# Supplementary material
Source: PubMed Central journal article supplement (PMC122701)
Supplement: pnas_072661699_1.pdf [file pnas_072661699_1.pdf]

## EXPERIMENTAL DETAILS

### A. Crystal Data

|                                                                        |                                                                                                                                                                                                                 |
|------------------------------------------------------------------------|-----------------------------------------------------------------------------------------------------------------------------------------------------------------------------------------------------------------|
| Empirical Formula                                                      | $C_{30}H_{36}N_{10}Ni$                                                                                                                                                                                          |
| Formula Weight                                                         | 595.38                                                                                                                                                                                                          |
| Crystal Color, Habit                                                   | violet, prismatic                                                                                                                                                                                               |
| Crystal Dimensions                                                     | 0.25 X 0.47 X 0.15 mm                                                                                                                                                                                           |
| Crystal System                                                         | triclinic                                                                                                                                                                                                       |
| Lattice Type                                                           | Primitive                                                                                                                                                                                                       |
| No. of Reflections Used for Unit Cell Determination ( $2\theta$ range) | 25 ( 24.0 - 31.0° )                                                                                                                                                                                             |
| Omega Scan Peak Width at Half-height                                   | 0.44°                                                                                                                                                                                                           |
| Lattice Parameters                                                     | $a = 10.395(8) \text{ \AA}$<br>$b = 11.117(6) \text{ \AA}$<br>$c = 8.425(4) \text{ \AA}$<br>$\alpha = 106.84(5)^\circ$<br>$\beta = 106.97(5)^\circ$<br>$\gamma = 104.33(6)^\circ$<br>$V = 830(1) \text{ \AA}^3$ |
| Space Group                                                            | $P\bar{1}$ (#2)                                                                                                                                                                                                 |
| Z value                                                                | 1                                                                                                                                                                                                               |
| $D_{calc}$                                                             | 1.190 g/cm <sup>3</sup>                                                                                                                                                                                         |
| $F_{000}$                                                              | 314.00                                                                                                                                                                                                          |
| $\mu(\text{MoK}\alpha)$                                                | 6.18 cm <sup>-1</sup>                                                                                                                                                                                           |

### B. Intensity Measurements

|                |                                                                            |
|----------------|----------------------------------------------------------------------------|
| Diffractometer | Rigaku AFC7R (rotating anode)                                              |
| Radiation      | MoK $\alpha$ ( $\lambda = 0.71069 \text{ \AA}$ )<br>graphite monochromated |

|                              |                                                                                                  |
|------------------------------|--------------------------------------------------------------------------------------------------|
| Attenuator                   | Zr foil (factor = 8.66)                                                                          |
| Temperature                  | 23.0 °C                                                                                          |
| Collimator Size              | 1.0 mm                                                                                           |
| Take-off Angle               | 6.0°                                                                                             |
| Detector Aperture            | 9.0 mm horizontal<br>13.0 mm vertical                                                            |
| Crystal to Detector Distance | 235 mm                                                                                           |
| Scan Type                    | $\omega$ - $2\theta$                                                                             |
| Scan Rate                    | 16.0°/min (in $\omega$ ) (up to 5 scans)                                                         |
| Scan Width                   | $(1.84 + 0.30 \tan \theta)^\circ$                                                                |
| $2\theta_{max}$              | 55.0°                                                                                            |
| No. of Reflections Measured  | Total: 4102<br>Unique: 3827 ( $R_{int} = 0.037$ )                                                |
| Corrections                  | Lorentz-polarization<br>Absorption<br>(trans. factors: 0.7831 - 0.9972)<br>Decay (0.99% decline) |

### C. Structure Solution and Refinement

|                                                                       |                                                                              |
|-----------------------------------------------------------------------|------------------------------------------------------------------------------|
| Structure Solution                                                    | Patterson Methods (DIRDIF94 PATTY)                                           |
| Refinement                                                            | Full-matrix least-squares                                                    |
| Function Minimized                                                    | $\Sigma w( F_o  -  F_c )^2$                                                  |
| Least Squares Weights                                                 | $w = \frac{1}{\sigma^2(F_o)} = [\sigma_c^2(F_o) + \frac{v^2}{4} F_o^2]^{-1}$ |
| p-factor                                                              | 0.1020                                                                       |
| Anomalous Dispersion                                                  | All non-hydrogen atoms                                                       |
| No. of Observations ( $I > 4.00\sigma(I)$ , $2\theta < 55.03^\circ$ ) | 1314                                                                         |
| No. Variables                                                         | 163                                                                          |
| Reflection/Parameter Ratio                                            | 8.06                                                                         |
| Residuals: R; Rw                                                      | 0.089 ; 0.119                                                                |

|                                 |                            |
|---------------------------------|----------------------------|
| Residuals: R1                   | 0.089                      |
| No. of Reflections to calc R1   | 1314                       |
| Goodness of Fit Indicator       | 1.76                       |
| Max Shift/Error in Final Cycle  | 0.371                      |
| Maximum peak in Final Diff. Map | $1.13 e^{-}/\text{\AA}^3$  |
| Minimum peak in Final Diff. Map | $-0.54 e^{-}/\text{\AA}^3$ |

Table 1. Atomic coordinates,  $B_{iso}/B_{eq}$  and occupancy

| atom  | x         | y          | z         | $B_{eq}$ | occ    |
|-------|-----------|------------|-----------|----------|--------|
| Ni(1) | 0.0000    | 0.0000     | 0.0000    | 1.84(6)  | 0.5000 |
| N(1)  | -0.169(1) | 0.0522(10) | -0.132(1) | 2.5(2)   | 1.0000 |
| N(2)  | -0.386(1) | 0.0592(10) | -0.154(1) | 3.1(3)   | 1.0000 |
| N(3)  | 0.137(1)  | 0.0504(10) | -0.125(1) | 2.6(2)   | 1.0000 |
| N(4)  | 0.350(1)  | 0.059(1)   | -0.144(1) | 3.3(3)   | 1.0000 |
| N(5)  | 0.099(1)  | 0.199(1)   | 0.203(1)  | 3.6(3)   | 1.0000 |
| C(1)  | -0.216(1) | 0.103(1)   | -0.259(2) | 3.6(3)   | 1.0000 |
| C(2)  | -0.348(1) | 0.105(1)   | -0.274(2) | 3.6(3)   | 1.0000 |
| C(3)  | -0.274(1) | 0.028(1)   | -0.072(1) | 2.2(3)   | 1.0000 |
| C(4)  | 0.153(1)  | 0.101(1)   | -0.253(2) | 3.1(3)   | 1.0000 |
| C(5)  | 0.281(1)  | 0.107(1)   | -0.264(2) | 3.9(4)   | 1.0000 |
| C(6)  | 0.258(1)  | 0.028(1)   | -0.068(1) | 1.9(3)   | 1.0000 |
| C(7)  | 0.139(2)  | 0.218(2)   | 0.375(2)  | 5.6(5)   | 1.0000 |
| C(8)  | 0.208(2)  | 0.346(2)   | 0.520(2)  | 8.0(6)   | 1.0000 |
| C(9)  | 0.230(2)  | 0.457(2)   | 0.480(3)  | 6.9(6)   | 1.0000 |
| C(10) | 0.196(3)  | 0.442(2)   | 0.308(3)  | 8.6(7)   | 1.0000 |
| C(11) | 0.123(2)  | 0.309(2)   | 0.167(2)  | 6.7(6)   | 1.0000 |
| C(12) | 0.307(4)  | 0.593(3)   | 0.628(6)  | 16(1)    | 1.0000 |
| C(13) | 0.3340    | 0.5997     | 0.8104    | 36(2)    | 1.0000 |
| C(14) | 0.2175    | 0.6962     | 0.5974    | 19(1)    | 1.0000 |
| C(15) | 0.4587    | 0.6782     | 0.6242    | 25(1)    | 1.0000 |
| H(1)  | -0.1691   | 0.1343     | -0.3300   | 4.7      | 1.0000 |
| H(2)  | -0.4142   | 0.1270     | -0.3574   | 5.0      | 1.0000 |
| H(3)  | -0.4700   | 0.0529     | -0.1282   | 5.0      | 0.5000 |

Table 1. Atomic coordinates,  $B_{iso}/B_{eq}$  and occupancy

| atom  | x      | y      | z       | $B_{eq}$ | occ    |
|-------|--------|--------|---------|----------|--------|
| H(4)  | 0.0840 | 0.1267 | -0.3291 | 4.6      | 1.0000 |
| H(5)  | 0.3237 | 0.1383 | -0.3377 | 5.1      | 1.0000 |
| H(6)  | 0.4418 | 0.0497 | -0.1173 | 4.4      | 0.5000 |
| H(7)  | 0.1190 | 0.1334 | 0.3997  | 7.6      | 1.0000 |
| H(8)  | 0.2396 | 0.3547 | 0.6401  | 10.4     | 1.0000 |
| H(9)  | 0.2181 | 0.5194 | 0.2757  | 13.3     | 1.0000 |
| H(10) | 0.0878 | 0.2929 | 0.0362  | 9.2      | 1.0000 |

$$B_{eq} = \frac{8}{3}\pi^2(U_{11}(aa^*)^2 + U_{22}(bb^*)^2 + U_{33}(cc^*)^2 + 2U_{12}aa^*bb^* \cos \gamma + 2U_{13}aa^*cc^* \cos \beta + 2U_{23}bb^*cc^* \cos \alpha)$$

Table 2. Anisotropic Displacement Parameters

| atom  | U <sub>11</sub> | U <sub>22</sub> | U <sub>33</sub> | U <sub>12</sub> | U <sub>13</sub> | U <sub>23</sub> |
|-------|-----------------|-----------------|-----------------|-----------------|-----------------|-----------------|
| Ni(1) | 0.014(1)        | 0.020(1)        | 0.024(2)        | 0.005(1)        | 0.005(1)        | -0.003(1)       |
| N(1)  | 0.037(6)        | 0.036(6)        | 0.030(6)        | 0.016(5)        | 0.018(5)        | 0.015(5)        |
| N(2)  | 0.031(7)        | 0.050(7)        | 0.049(7)        | 0.021(5)        | 0.019(6)        | 0.026(6)        |
| N(3)  | 0.042(6)        | 0.036(6)        | 0.025(5)        | 0.015(5)        | 0.017(5)        | 0.014(5)        |
| N(4)  | 0.049(7)        | 0.047(7)        | 0.051(7)        | 0.020(6)        | 0.037(6)        | 0.028(6)        |
| N(5)  | 0.062(8)        | 0.034(7)        | 0.043(7)        | 0.021(6)        | 0.025(6)        | 0.012(6)        |
| C(1)  | 0.045(8)        | 0.053(9)        | 0.043(8)        | 0.014(7)        | 0.024(7)        | 0.020(7)        |
| C(2)  | 0.055(9)        | 0.061(9)        | 0.039(8)        | 0.027(7)        | 0.021(7)        | 0.035(7)        |
| C(3)  | 0.033(7)        | 0.028(7)        | 0.026(7)        | 0.017(6)        | 0.014(6)        | 0.009(6)        |
| C(4)  | 0.028(7)        | 0.058(9)        | 0.044(8)        | 0.025(6)        | 0.018(6)        | 0.025(7)        |
| C(5)  | 0.050(9)        | 0.062(10)       | 0.051(9)        | 0.024(8)        | 0.024(7)        | 0.037(8)        |
| C(6)  | 0.021(6)        | 0.026(6)        | 0.022(6)        | 0.008(5)        | 0.006(5)        | 0.008(6)        |
| C(7)  | 0.09(1)         | 0.07(1)         | 0.06(1)         | 0.041(10)       | 0.026(10)       | 0.04(1)         |
| C(8)  | 0.14(2)         | 0.08(2)         | 0.05(1)         | 0.03(1)         | 0.01(1)         | 0.00(1)         |
| C(9)  | 0.12(2)         | 0.06(1)         | 0.06(1)         | 0.02(1)         | 0.02(1)         | 0.01(1)         |
| C(10) | 0.15(2)         | 0.03(1)         | 0.11(2)         | 0.02(1)         | 0.03(2)         | 0.01(1)         |
| C(11) | 0.11(2)         | 0.09(2)         | 0.08(1)         | 0.05(1)         | 0.05(1)         | 0.05(1)         |
| C(12) | 0.29(4)         | 0.14(3)         | 0.33(5)         | 0.10(3)         | 0.20(4)         | 0.16(3)         |

The general temperature factor expression:

$$\exp(-2\pi^2(a^*U_{11}h^2 + b^*U_{22}k^2 + c^*U_{33}l^2 + 2a^*b^*U_{12}hk + 2a^*c^*U_{13}hl + 2b^*c^*U_{23}kl))$$

Table 3. Bond Lengths( $\text{\AA}$ )

| atom  | atom  | distance | atom  | atom               | distance |
|-------|-------|----------|-------|--------------------|----------|
| Ni(1) | N(1)  | 2.09(1)  | Ni(1) | N(1) <sup>1)</sup> | 2.09(1)  |
| Ni(1) | N(3)  | 2.066(9) | Ni(1) | N(3) <sup>1)</sup> | 2.066(9) |
| Ni(1) | N(5)  | 2.13(1)  | Ni(1) | N(5) <sup>1)</sup> | 2.13(1)  |
| N(1)  | C(1)  | 1.38(2)  | N(1)  | C(3)               | 1.33(1)  |
| N(2)  | C(2)  | 1.36(2)  | N(2)  | C(3)               | 1.35(1)  |
| N(2)  | H(3)  | 0.95     | N(3)  | C(4)               | 1.38(1)  |
| N(3)  | C(6)  | 1.33(1)  | N(4)  | C(5)               | 1.38(2)  |
| N(4)  | C(6)  | 1.33(1)  | N(4)  | H(6)               | 0.95     |
| N(5)  | C(7)  | 1.32(2)  | N(5)  | C(11)              | 1.33(2)  |
| C(1)  | C(2)  | 1.34(2)  | C(1)  | H(1)               | 0.96     |
| C(2)  | H(2)  | 0.97     | C(3)  | C(6) <sup>1)</sup> | 1.47(2)  |
| C(4)  | C(5)  | 1.35(2)  | C(4)  | H(4)               | 0.97     |
| C(5)  | H(5)  | 0.95     | C(7)  | C(8)               | 1.42(2)  |
| C(7)  | H(7)  | 1.00     | C(8)  | C(9)               | 1.36(2)  |
| C(8)  | H(8)  | 0.93     | C(9)  | C(10)              | 1.34(3)  |
| C(9)  | C(12) | 1.48(4)  | C(10) | C(11)              | 1.44(2)  |
| C(10) | H(9)  | 0.97     | C(11) | H(10)              | 1.00     |
| C(12) | C(13) | 1.45(4)  | C(12) | C(14)              | 1.68(3)  |
| C(12) | C(15) | 1.64(3)  |       |                    |          |

Symmetry operations

(1)  $-X,-Y,-Z$

Table 4. Bond Angles(°)

| atom               | atom  | atom               | angle     | atom               | atom  | atom               | angle     |
|--------------------|-------|--------------------|-----------|--------------------|-------|--------------------|-----------|
| N(1)               | Ni(1) | N(1) <sup>1)</sup> | 180.0     | N(1)               | Ni(1) | N(3)               | 99.0(4)   |
| N(1)               | Ni(1) | N(3) <sup>1)</sup> | 81.0(4)   | N(1)               | Ni(1) | N(5)               | 89.7(4)   |
| N(1)               | Ni(1) | N(5) <sup>1)</sup> | 90.3(4)   | N(1) <sup>1)</sup> | Ni(1) | N(3)               | 81.0(4)   |
| N(1) <sup>1)</sup> | Ni(1) | N(3) <sup>1)</sup> | 99.0(4)   | N(1) <sup>1)</sup> | Ni(1) | N(5)               | 90.3(4)   |
| N(1) <sup>1)</sup> | Ni(1) | N(5) <sup>1)</sup> | 89.7(4)   | N(3)               | Ni(1) | N(3) <sup>1)</sup> | 180.0     |
| N(3)               | Ni(1) | N(5)               | 90.2(4)   | N(3)               | Ni(1) | N(5) <sup>1)</sup> | 89.8(4)   |
| N(3) <sup>1)</sup> | Ni(1) | N(5)               | 89.8(4)   | N(3) <sup>1)</sup> | Ni(1) | N(5) <sup>1)</sup> | 90.2(4)   |
| N(5)               | Ni(1) | N(5) <sup>1)</sup> | 180.0     | Ni(1)              | N(1)  | C(1)               | 144.8(8)  |
| Ni(1)              | N(1)  | C(3)               | 110.5(8)  | C(1)               | N(1)  | C(3)               | 104(1)    |
| C(2)               | N(2)  | C(3)               | 104.7(10) | C(2)               | N(2)  | H(3)               | 129.1     |
| C(3)               | N(2)  | H(3)               | 126.2     | Ni(1)              | N(3)  | C(4)               | 144.2(9)  |
| Ni(1)              | N(3)  | C(6)               | 113.4(8)  | C(4)               | N(3)  | C(6)               | 102.4(10) |
| C(5)               | N(4)  | C(6)               | 103.5(10) | C(5)               | N(4)  | H(6)               | 130.3     |
| C(6)               | N(4)  | H(6)               | 126.2     | Ni(1)              | N(5)  | C(7)               | 120(1)    |
| Ni(1)              | N(5)  | C(11)              | 123(1)    | C(7)               | N(5)  | C(11)              | 116(1)    |
| N(1)               | C(1)  | C(2)               | 108(1)    | N(1)               | C(1)  | H(1)               | 129.4     |
| C(2)               | C(1)  | H(1)               | 121.9     | N(2)               | C(2)  | C(1)               | 109(1)    |
| N(2)               | C(2)  | H(2)               | 121.1     | C(1)               | C(2)  | H(2)               | 129.6     |
| N(1)               | C(3)  | N(2)               | 112.6(10) | N(1)               | C(3)  | C(6) <sup>1)</sup> | 119(1)    |
| N(2)               | C(3)  | C(6) <sup>1)</sup> | 128(1)    | N(3)               | C(4)  | C(5)               | 110(1)    |
| N(3)               | C(4)  | H(4)               | 127.2     | C(5)               | C(4)  | H(4)               | 122.6     |
| N(4)               | C(5)  | C(4)               | 108(1)    | N(4)               | C(5)  | H(5)               | 121.7     |
| C(4)               | C(5)  | H(5)               | 130.2     | N(3)               | C(6)  | N(4)               | 115(1)    |
| N(3)               | C(6)  | C(3) <sup>1)</sup> | 115.8(10) | N(4)               | C(6)  | C(3) <sup>1)</sup> | 128(1)    |



Table 4. Bond Angles(°) (continued)

| atom  | atom  | atom  | angle  | atom  | atom  | atom  | angle  |
|-------|-------|-------|--------|-------|-------|-------|--------|
| N(5)  | C(7)  | C(8)  | 124(1) | N(5)  | C(7)  | H(7)  | 115.4  |
| C(8)  | C(7)  | H(7)  | 120.1  | C(7)  | C(8)  | C(9)  | 117(1) |
| C(7)  | C(8)  | H(8)  | 121.4  | C(9)  | C(8)  | H(8)  | 120.6  |
| C(8)  | C(9)  | C(10) | 118(1) | C(8)  | C(9)  | C(12) | 119(2) |
| C(10) | C(9)  | C(12) | 121(2) | C(9)  | C(10) | C(11) | 120(1) |
| C(9)  | C(10) | H(9)  | 120.8  | C(11) | C(10) | H(9)  | 119.2  |
| N(5)  | C(11) | C(10) | 121(1) | N(5)  | C(11) | H(10) | 115.5  |
| C(10) | C(11) | H(10) | 122.8  | C(9)  | C(12) | C(13) | 117(1) |
| C(9)  | C(12) | C(14) | 110(2) | C(9)  | C(12) | C(15) | 113(2) |
| C(13) | C(12) | C(14) | 106(2) | C(13) | C(12) | C(15) | 108(2) |
| C(14) | C(12) | C(15) | 98(1)  |       |       |       |        |

## Symmetry operations

(1) -X,-Y,-Z
