# Supplementary material
Source: PubMed Central journal article supplement (PMC122701)
Supplement: pnas_072661699_2.pdf [file pnas_072661699_2.pdf]

## EXPERIMENTAL DETAILS

### A. Crystal Data

|                                                                        |                                                                                     |
|------------------------------------------------------------------------|-------------------------------------------------------------------------------------|
| Empirical Formula                                                      | C <sub>44</sub> H <sub>36</sub> N <sub>20</sub> Ni <sub>2</sub>                     |
| Formula Weight                                                         | 962.30                                                                              |
| Crystal Color, Habit                                                   | orange, prismatic                                                                   |
| Crystal Dimensions                                                     | 0.21 X 0.18 X 0.27 mm                                                               |
| Crystal System                                                         | orthorhombic                                                                        |
| Lattice Type                                                           | Primitive                                                                           |
| No. of Reflections Used for Unit Cell Determination (2 $\theta$ range) | 20 ( 20.1 - 27.9° )                                                                 |
| Omega Scan Peak Width at Half-height                                   | 0.42°                                                                               |
| Lattice Parameters                                                     | a = 33.248(6) Å<br>b = 16.832(5) Å<br>c = 16.279(4) Å<br>V = 9110(6) Å <sup>3</sup> |
| Space Group                                                            | Pbca (#61)                                                                          |
| Z value                                                                | 8                                                                                   |
| D <sub>calc</sub>                                                      | 1.403 g/cm <sup>3</sup>                                                             |
| F <sub>000</sub>                                                       | 3968.00                                                                             |
| $\mu(\text{MoK}\alpha)$                                                | 8.84 cm <sup>-1</sup>                                                               |

### B. Intensity Measurements

|                |                                                                 |
|----------------|-----------------------------------------------------------------|
| Diffractometer | Rigaku AFC7R (rotating anode)                                   |
| Radiation      | MoK $\alpha$ ( $\lambda = 0.71069$ Å)<br>graphite monochromated |
| Attenuator     | Zr foil (factor = 8.71)                                         |

|                              |                                                                                                   |
|------------------------------|---------------------------------------------------------------------------------------------------|
| Temperature                  | 20.0 °C                                                                                           |
| Collimator Size              | 1.0 mm                                                                                            |
| Take-off Angle               | 6.0°                                                                                              |
| Detector Aperture            | 9.0 mm horizontal<br>13.0 mm vertical                                                             |
| Crystal to Detector Distance | 400 mm                                                                                            |
| Scan Type                    | $\omega$ - $2\theta$                                                                              |
| Scan Rate                    | 16.0°/min (in $\omega$ ) (up to 3 scans)                                                          |
| Scan Width                   | $(0.73 + 0.30 \tan \theta)^\circ$                                                                 |
| $2\theta_{max}$              | 60.0°                                                                                             |
| No. of Reflections Measured  | Total: 11611                                                                                      |
| Corrections                  | Lorentz-polarization<br>Absorption<br>(trans. factors: 0.3770 - 0.8529)<br>Decay (0.37% increase) |

### C. Structure Solution and Refinement

|                                                              |                                                                              |
|--------------------------------------------------------------|------------------------------------------------------------------------------|
| Structure Solution                                           | Direct Methods (SHELXS-86)                                                   |
| Refinement                                                   | Full-matrix least-squares                                                    |
| Function Minimized                                           | $\Sigma w( Fo  -  Fc )^2$                                                    |
| Least Squares Weights                                        | $w = \frac{1}{\sigma^2(F_o)} = [\sigma_c^2(F_o) + \frac{v^2}{4} F_o^2]^{-1}$ |
| p-factor                                                     | 0.0070                                                                       |
| Anomalous Dispersion                                         | All non-hydrogen atoms                                                       |
| No. of Observations (I>3.00 $\sigma$ (I), 2 $\theta$ <0.00°) | 3727                                                                         |
| No. Variables                                                | 740                                                                          |
| Reflection/Parameter Ratio                                   | 5.04                                                                         |
| Residuals: R; Rw                                             | 0.041 ; 0.033                                                                |
| Residuals: R1                                                | 0.041                                                                        |
| No. of Reflections to calc R1                                | 3727                                                                         |

|                                 |                            |
|---------------------------------|----------------------------|
| Goodness of Fit Indicator       | 1.51                       |
| Max Shift/Error in Final Cycle  | 5.452                      |
| Maximum peak in Final Diff. Map | $0.22 e^{-}/\text{\AA}^3$  |
| Minimum peak in Final Diff. Map | $-0.17 e^{-}/\text{\AA}^3$ |

Table 1. Atomic coordinates and  $B_{iso}/B_{eq}$ 

| atom  | x          | y          | z          | $B_{eq}$ |
|-------|------------|------------|------------|----------|
| Ni(1) | 0.83690(2) | 0.19531(4) | 0.23093(4) | 4.48(2)  |
| Ni(2) | 0.58512(2) | 0.25019(5) | 0.06842(5) | 5.36(2)  |
| N(1)  | 0.8681(1)  | 0.1388(3)  | 0.3266(3)  | 5.0(1)   |
| N(2)  | 0.8961(1)  | 0.1965(3)  | 0.1876(3)  | 5.6(1)   |
| N(3)  | 0.8354(1)  | 0.3026(3)  | 0.2968(3)  | 4.7(1)   |
| N(4)  | 0.8058(2)  | 0.4200(3)  | 0.3036(3)  | 5.3(1)   |
| N(5)  | 0.8123(1)  | 0.2693(3)  | 0.1430(3)  | 4.8(1)   |
| N(6)  | 0.7781(1)  | 0.3850(3)  | 0.1245(3)  | 5.4(1)   |
| N(7)  | 0.7810(1)  | 0.1613(3)  | 0.2768(3)  | 4.2(1)   |
| N(8)  | 0.7351(1)  | 0.0625(3)  | 0.2830(3)  | 5.6(1)   |
| N(9)  | 0.8280(1)  | 0.0883(3)  | 0.1650(3)  | 4.5(1)   |
| N(10) | 0.7853(1)  | -0.0089(3) | 0.1391(3)  | 4.8(1)   |
| N(11) | 0.6416(2)  | 0.1985(3)  | 0.0456(3)  | 6.3(2)   |
| N(12) | 0.6207(2)  | 0.2980(3)  | 0.1630(3)  | 5.8(2)   |
| N(13) | 0.5895(2)  | 0.3552(3)  | 0.0001(3)  | 5.3(1)   |
| N(14) | 0.5577(2)  | 0.4654(3)  | -0.0413(3) | 5.5(2)   |
| N(15) | 0.5329(1)  | 0.3080(3)  | 0.1037(3)  | 5.1(1)   |
| N(16) | 0.4916(2)  | 0.4113(3)  | 0.0837(3)  | 5.5(1)   |
| N(17) | 0.5570(1)  | 0.1955(3)  | -0.0306(3) | 4.9(1)   |
| N(18) | 0.5180(1)  | 0.0959(3)  | -0.0726(3) | 5.2(1)   |
| N(19) | 0.5665(1)  | 0.1449(3)  | 0.1250(3)  | 5.1(1)   |
| N(20) | 0.5308(1)  | 0.0314(3)  | 0.1068(3)  | 5.0(1)   |
| C(1)  | 0.8528(2)  | 0.1195(4)  | 0.3992(4)  | 6.0(2)   |
| C(2)  | 0.8753(3)  | 0.0896(5)  | 0.4630(5)  | 7.7(2)   |

Table 1. Atomic coordinates and  $B_{iso}/B_{eq}$  (continued)

| atom  | x         | y          | z          | $B_{eq}$ |
|-------|-----------|------------|------------|----------|
| C(3)  | 0.9153(3) | 0.0793(6)  | 0.4491(6)  | 9.5(3)   |
| C(4)  | 0.9320(2) | 0.0975(5)  | 0.3751(6)  | 8.1(3)   |
| C(5)  | 0.9077(2) | 0.1281(4)  | 0.3122(4)  | 5.6(2)   |
| C(6)  | 0.9216(2) | 0.1524(4)  | 0.2312(5)  | 6.0(2)   |
| C(7)  | 0.9593(2) | 0.1303(5)  | 0.2011(6)  | 8.6(3)   |
| C(8)  | 0.9691(3) | 0.1571(7)  | 0.1229(7)  | 10.4(4)  |
| C(9)  | 0.9442(3) | 0.2019(6)  | 0.0805(6)  | 9.4(3)   |
| C(10) | 0.9074(2) | 0.2212(4)  | 0.1141(5)  | 7.1(2)   |
| C(11) | 0.8138(2) | 0.3561(4)  | 0.2570(3)  | 4.5(2)   |
| C(12) | 0.8012(2) | 0.3393(4)  | 0.1737(4)  | 4.7(2)   |
| C(13) | 0.8415(2) | 0.3340(4)  | 0.3744(4)  | 5.6(2)   |
| C(14) | 0.8237(2) | 0.4048(4)  | 0.3781(4)  | 5.9(2)   |
| C(15) | 0.7959(2) | 0.2702(4)  | 0.0660(4)  | 5.7(2)   |
| C(16) | 0.7751(2) | 0.3387(5)  | 0.0555(4)  | 6.4(2)   |
| C(17) | 0.7688(2) | 0.0907(3)  | 0.2480(3)  | 4.2(1)   |
| C(18) | 0.7931(2) | 0.0552(3)  | 0.1850(3)  | 4.1(1)   |
| C(19) | 0.7530(2) | 0.1808(4)  | 0.3346(4)  | 5.1(2)   |
| C(20) | 0.7259(2) | 0.1212(5)  | 0.3378(4)  | 6.1(2)   |
| C(21) | 0.8431(2) | 0.0414(4)  | 0.1032(4)  | 5.0(2)   |
| C(22) | 0.8179(2) | -0.0178(4) | 0.0874(4)  | 5.5(2)   |
| C(23) | 0.6487(2) | 0.1441(6)  | -0.0101(5) | 7.8(3)   |
| C(24) | 0.6840(3) | 0.1005(6)  | -0.0139(6) | 9.3(3)   |
| C(25) | 0.7126(3) | 0.1154(8)  | 0.0443(7)  | 11.3(4)  |
| C(26) | 0.7053(3) | 0.1722(7)  | 0.1024(6)  | 10.5(4)  |

Table 1. Atomic coordinates and  $B_{iso}/B_{eq}$  (continued)

| atom  | x         | y         | z          | $B_{eq}$ |
|-------|-----------|-----------|------------|----------|
| C(27) | 0.6696(2) | 0.2142(5) | 0.1041(5)  | 6.7(2)   |
| C(28) | 0.6586(3) | 0.2746(5) | 0.1630(4)  | 6.7(2)   |
| C(29) | 0.6868(3) | 0.3102(7) | 0.2164(6)  | 8.9(3)   |
| C(30) | 0.6749(4) | 0.3680(8) | 0.2663(6)  | 10.8(4)  |
| C(31) | 0.6361(3) | 0.3934(5) | 0.2672(5)  | 8.7(3)   |
| C(32) | 0.6100(2) | 0.3564(5) | 0.2133(5)  | 7.2(2)   |
| C(33) | 0.5572(2) | 0.4022(4) | 0.0095(4)  | 5.0(2)   |
| C(34) | 0.5267(2) | 0.3767(4) | 0.0659(4)  | 4.9(2)   |
| C(35) | 0.6117(2) | 0.3915(5) | -0.0604(5) | 6.0(2)   |
| C(36) | 0.5926(2) | 0.4578(5) | -0.0866(4) | 6.2(2)   |
| C(37) | 0.4992(2) | 0.2963(4) | 0.1498(4)  | 5.7(2)   |
| C(38) | 0.4741(2) | 0.3578(5) | 0.1372(4)  | 6.1(2)   |
| C(39) | 0.5389(2) | 0.1281(4) | -0.0095(4) | 4.4(2)   |
| C(40) | 0.5443(2) | 0.0997(4) | 0.0744(4)  | 4.3(2)   |
| C(41) | 0.5471(2) | 0.2060(4) | -0.1118(4) | 5.7(2)   |
| C(42) | 0.5239(2) | 0.1463(5) | -0.1374(4) | 6.1(2)   |
| C(43) | 0.5671(2) | 0.1012(5) | 0.1956(4)  | 5.9(2)   |
| C(44) | 0.5461(2) | 0.0338(4) | 0.1854(4)  | 6.0(2)   |
| H(1)  | 0.824(1)  | 0.130(3)  | 0.405(3)   | 4(1)     |
| H(2)  | 0.864(3)  | 0.075(5)  | 0.527(5)   | 19.7(6)  |
| H(3)  | 0.930(2)  | 0.062(4)  | 0.489(4)   | 8.9(9)   |
| H(4)  | 0.960(2)  | 0.097(4)  | 0.361(4)   | 9.4(9)   |
| H(5)  | 0.974(2)  | 0.092(4)  | 0.233(4)   | 10.0(8)  |
| H(6)  | 0.991(2)  | 0.138(4)  | 0.100(4)   | 11.7(7)  |

Table 1. Atomic coordinates and  $B_{iso}/B_{eq}$  (continued)

| atom  | x        | y         | z         | $B_{eq}$ |
|-------|----------|-----------|-----------|----------|
| H(7)  | 0.946(2) | 0.228(3)  | 0.028(3)  | 6(1)     |
| H(8)  | 0.889(1) | 0.257(2)  | 0.089(2)  | 2.6(10)  |
| H(9)  | 0.856(1) | 0.305(3)  | 0.412(3)  | 4(1)     |
| H(10) | 0.825(1) | 0.443(3)  | 0.416(3)  | 4(1)     |
| H(11) | 0.798(1) | 0.224(3)  | 0.035(3)  | 4(1)     |
| H(12) | 0.764(2) | 0.361(3)  | 0.009(3)  | 8(1)     |
| H(13) | 0.793(1) | 0.470(3)  | 0.289(3)  | 4(1)     |
| H(14) | 0.755(1) | 0.230(2)  | 0.357(2)  | 3(1)     |
| H(15) | 0.703(1) | 0.119(3)  | 0.362(3)  | 5(1)     |
| H(16) | 0.868(1) | 0.053(2)  | 0.081(3)  | 3.5(10)  |
| H(17) | 0.818(1) | -0.057(3) | 0.055(3)  | 3(1)     |
| H(18) | 0.766(2) | -0.039(3) | 0.140(4)  | 7.4(9)   |
| H(19) | 0.630(2) | 0.140(3)  | -0.055(3) | 7(1)     |
| H(20) | 0.687(2) | 0.058(3)  | -0.056(4) | 7.7(9)   |
| H(21) | 0.738(2) | 0.089(4)  | 0.039(4)  | 10.7(8)  |
| H(22) | 0.721(2) | 0.185(5)  | 0.148(4)  | 11.2(8)  |
| H(23) | 0.708(2) | 0.282(4)  | 0.212(4)  | 8.2(8)   |
| H(24) | 0.692(2) | 0.396(5)  | 0.300(5)  | 14.4(6)  |
| H(25) | 0.624(3) | 0.449(5)  | 0.297(5)  | 19.1(6)  |
| H(26) | 0.582(2) | 0.376(3)  | 0.204(4)  | 7.9(10)  |
| H(27) | 0.635(1) | 0.360(3)  | -0.076(3) | 4(1)     |
| H(28) | 0.598(2) | 0.502(3)  | -0.125(3) | 6(1)     |
| H(29) | 0.496(1) | 0.246(3)  | 0.177(3)  | 4(1)     |
| H(30) | 0.451(1) | 0.365(3)  | 0.159(3)  | 3(1)     |

Table 1. Atomic coordinates and  $B_{iso}/B_{eq}$  (continued)

| atom  | x        | y         | z         | $B_{eq}$ |
|-------|----------|-----------|-----------|----------|
| H(31) | 0.531(3) | 0.517(6)  | -0.053(5) | 20.4(6)  |
| H(32) | 0.560(1) | 0.248(3)  | -0.139(3) | 6(1)     |
| H(33) | 0.511(2) | 0.134(3)  | -0.189(3) | 7(1)     |
| H(34) | 0.580(2) | 0.123(3)  | 0.235(3)  | 5(1)     |
| H(35) | 0.544(2) | -0.008(3) | 0.220(3)  | 6(1)     |
| H(36) | 0.506(2) | 0.045(4)  | -0.083(4) | 10.2(9)  |

$$B_{eq} = \frac{8}{3}\pi^2(U_{11}(aa^*)^2 + U_{22}(bb^*)^2 + U_{33}(cc^*)^2 + 2U_{12}aa^*bb^* \cos \gamma + 2U_{13}aa^*cc^* \cos \beta + 2U_{23}bb^*cc^* \cos \alpha)$$



Table 2. Anisotropic Displacement Parameters

| atom  | $U_{11}$  | $U_{22}$  | $U_{33}$  | $U_{12}$   | $U_{13}$   | $U_{23}$   |
|-------|-----------|-----------|-----------|------------|------------|------------|
| Ni(1) | 0.0476(4) | 0.0707(5) | 0.0518(4) | 0.0012(4)  | 0.0012(4)  | -0.0007(4) |
| Ni(2) | 0.0582(4) | 0.0809(5) | 0.0647(5) | -0.0069(5) | -0.0088(4) | 0.0062(5)  |
| N(1)  | 0.058(3)  | 0.074(4)  | 0.059(3)  | 0.004(3)   | -0.006(3)  | 0.006(3)   |
| N(2)  | 0.052(3)  | 0.097(4)  | 0.061(3)  | -0.013(3)  | 0.012(3)   | -0.002(3)  |
| N(3)  | 0.058(3)  | 0.069(3)  | 0.052(3)  | 0.004(3)   | -0.010(2)  | 0.003(3)   |
| N(4)  | 0.079(4)  | 0.066(4)  | 0.055(3)  | 0.014(3)   | -0.017(3)  | -0.006(3)  |
| N(5)  | 0.064(3)  | 0.073(4)  | 0.045(3)  | 0.009(3)   | -0.002(3)  | -0.001(3)  |
| N(6)  | 0.078(4)  | 0.082(4)  | 0.046(3)  | 0.015(3)   | -0.003(3)  | -0.005(3)  |
| N(7)  | 0.050(3)  | 0.066(3)  | 0.042(3)  | 0.002(2)   | 0.003(2)   | -0.002(3)  |
| N(8)  | 0.062(3)  | 0.087(4)  | 0.062(3)  | -0.013(3)  | 0.015(3)   | -0.014(3)  |
| N(9)  | 0.046(3)  | 0.064(3)  | 0.061(3)  | 0.003(3)   | 0.009(2)   | -0.003(3)  |
| N(10) | 0.056(4)  | 0.070(4)  | 0.057(3)  | -0.004(3)  | 0.006(3)   | -0.007(3)  |
| N(11) | 0.063(4)  | 0.100(5)  | 0.075(4)  | 0.007(4)   | -0.002(3)  | 0.009(3)   |
| N(12) | 0.067(4)  | 0.090(4)  | 0.064(4)  | -0.016(3)  | -0.015(3)  | 0.012(3)   |
| N(13) | 0.052(3)  | 0.085(4)  | 0.065(3)  | -0.018(3)  | -0.001(3)  | 0.013(3)   |
| N(14) | 0.062(4)  | 0.080(4)  | 0.068(4)  | -0.012(3)  | -0.003(3)  | 0.013(3)   |
| N(15) | 0.060(3)  | 0.075(4)  | 0.061(3)  | -0.008(3)  | 0.001(3)   | 0.002(3)   |
| N(16) | 0.068(4)  | 0.082(4)  | 0.058(3)  | -0.002(3)  | 0.005(3)   | 0.003(3)   |
| N(17) | 0.054(3)  | 0.078(4)  | 0.056(3)  | -0.004(3)  | -0.008(3)  | 0.006(3)   |
| N(18) | 0.060(3)  | 0.076(4)  | 0.060(3)  | -0.001(3)  | -0.009(3)  | -0.001(3)  |
| N(19) | 0.061(3)  | 0.074(4)  | 0.058(3)  | -0.007(3)  | -0.013(3)  | 0.001(3)   |
| N(20) | 0.056(3)  | 0.077(4)  | 0.057(3)  | 0.001(3)   | -0.004(3)  | 0.003(3)   |
| C(1)  | 0.073(5)  | 0.084(5)  | 0.072(5)  | 0.009(4)   | -0.015(4)  | 0.011(4)   |
| C(2)  | 0.104(6)  | 0.103(6)  | 0.087(6)  | 0.015(5)   | -0.026(5)  | 0.024(5)   |

Table 2. Anisotropic Displacement Parameters (continued)

| atom  | $U_{11}$ | $U_{22}$ | $U_{33}$ | $U_{12}$  | $U_{13}$  | $U_{23}$  |
|-------|----------|----------|----------|-----------|-----------|-----------|
| C(3)  | 0.131(9) | 0.123(7) | 0.108(8) | 0.028(7)  | -0.051(7) | 0.028(6)  |
| C(4)  | 0.070(5) | 0.118(7) | 0.120(7) | 0.022(5)  | -0.024(6) | -0.002(6) |
| C(5)  | 0.056(4) | 0.076(4) | 0.083(5) | 0.008(4)  | -0.005(4) | -0.013(4) |
| C(6)  | 0.048(4) | 0.093(5) | 0.087(5) | 0.001(4)  | -0.003(4) | -0.028(5) |
| C(7)  | 0.068(6) | 0.138(8) | 0.122(8) | 0.019(5)  | 0.013(5)  | -0.030(6) |
| C(8)  | 0.070(7) | 0.19(1)  | 0.14(1)  | -0.014(7) | 0.033(7)  | -0.061(9) |
| C(9)  | 0.091(7) | 0.17(1)  | 0.098(8) | -0.014(7) | 0.030(6)  | -0.013(7) |
| C(10) | 0.062(5) | 0.105(7) | 0.102(7) | -0.001(4) | 0.014(5)  | -0.010(5) |
| C(11) | 0.060(4) | 0.064(4) | 0.046(4) | 0.000(3)  | -0.003(3) | -0.008(3) |
| C(12) | 0.060(4) | 0.067(4) | 0.050(4) | 0.002(3)  | 0.005(3)  | 0.000(4)  |
| C(13) | 0.072(5) | 0.083(6) | 0.057(4) | 0.005(4)  | -0.015(4) | 0.005(4)  |
| C(14) | 0.089(5) | 0.081(6) | 0.056(5) | -0.001(5) | -0.016(4) | -0.012(4) |
| C(15) | 0.076(5) | 0.082(6) | 0.057(4) | 0.011(4)  | 0.003(4)  | -0.023(4) |
| C(16) | 0.090(5) | 0.106(6) | 0.046(4) | 0.022(5)  | -0.005(4) | -0.010(4) |
| C(17) | 0.047(4) | 0.066(4) | 0.045(3) | 0.002(3)  | -0.003(3) | -0.005(3) |
| C(18) | 0.053(4) | 0.059(4) | 0.042(3) | 0.005(3)  | -0.002(3) | 0.000(3)  |
| C(19) | 0.066(4) | 0.069(5) | 0.058(4) | 0.006(4)  | 0.004(3)  | -0.017(4) |
| C(20) | 0.058(5) | 0.103(6) | 0.072(5) | -0.009(5) | 0.019(4)  | -0.016(4) |
| C(21) | 0.054(4) | 0.080(5) | 0.058(4) | 0.006(4)  | 0.022(3)  | -0.004(4) |
| C(22) | 0.082(5) | 0.074(5) | 0.054(4) | -0.001(4) | 0.013(4)  | -0.006(4) |
| C(23) | 0.063(5) | 0.143(8) | 0.091(6) | 0.022(5)  | -0.007(4) | 0.011(6)  |
| C(24) | 0.097(7) | 0.138(9) | 0.118(8) | 0.038(7)  | -0.005(6) | 0.005(6)  |
| C(25) | 0.083(7) | 0.20(1)  | 0.14(1)  | 0.054(8)  | -0.002(7) | 0.043(9)  |
| C(26) | 0.090(8) | 0.19(1)  | 0.118(9) | 0.028(7)  | -0.035(6) | 0.029(8)  |

Table 2. Anisotropic Displacement Parameters (continued)

| atom  | U <sub>11</sub> | U <sub>22</sub> | U <sub>33</sub> | U <sub>12</sub> | U <sub>13</sub> | U <sub>23</sub> |
|-------|-----------------|-----------------|-----------------|-----------------|-----------------|-----------------|
| C(27) | 0.048(5)        | 0.122(7)        | 0.084(5)        | -0.013(4)       | -0.019(4)       | 0.041(5)        |
| C(28) | 0.081(6)        | 0.112(7)        | 0.064(5)        | -0.026(5)       | -0.017(4)       | 0.019(4)        |
| C(29) | 0.096(7)        | 0.16(1)         | 0.085(6)        | -0.023(8)       | -0.024(6)       | 0.034(7)        |
| C(30) | 0.14(1)         | 0.19(1)         | 0.082(7)        | -0.077(9)       | -0.026(8)       | 0.009(7)        |
| C(31) | 0.136(8)        | 0.128(8)        | 0.067(5)        | -0.049(7)       | -0.016(6)       | 0.004(5)        |
| C(32) | 0.100(6)        | 0.103(7)        | 0.070(5)        | -0.019(6)       | -0.016(5)       | 0.007(5)        |
| C(33) | 0.060(4)        | 0.068(5)        | 0.061(4)        | -0.016(4)       | -0.014(4)       | 0.003(4)        |
| C(34) | 0.062(4)        | 0.070(5)        | 0.053(4)        | -0.010(4)       | -0.004(4)       | 0.011(4)        |
| C(35) | 0.055(5)        | 0.089(6)        | 0.085(5)        | -0.005(4)       | -0.011(4)       | 0.003(5)        |
| C(36) | 0.064(5)        | 0.095(6)        | 0.079(5)        | -0.022(4)       | -0.004(4)       | 0.022(4)        |
| C(37) | 0.081(5)        | 0.075(5)        | 0.061(4)        | -0.009(5)       | -0.004(4)       | 0.002(4)        |
| C(38) | 0.068(5)        | 0.103(6)        | 0.062(5)        | -0.006(5)       | 0.014(4)        | 0.000(4)        |
| C(39) | 0.037(3)        | 0.072(5)        | 0.059(4)        | 0.009(3)        | 0.001(3)        | 0.006(4)        |
| C(40) | 0.044(4)        | 0.064(4)        | 0.056(4)        | 0.009(3)        | 0.000(3)        | 0.006(4)        |
| C(41) | 0.064(4)        | 0.087(6)        | 0.066(5)        | -0.012(4)       | -0.004(4)       | 0.018(4)        |
| C(42) | 0.072(5)        | 0.097(6)        | 0.061(5)        | -0.009(4)       | -0.012(4)       | 0.013(5)        |
| C(43) | 0.080(5)        | 0.087(6)        | 0.055(5)        | -0.003(4)       | -0.013(4)       | 0.003(4)        |
| C(44) | 0.078(5)        | 0.078(5)        | 0.073(5)        | 0.004(4)        | -0.009(4)       | 0.013(5)        |

The general temperature factor expression:

$$\exp(-2\pi^2(a^*U_{11}h^2 + b^*U_{22}k^2 + c^*U_{33}l^2 + 2a^*b^*U_{12}hk + 2a^*c^*U_{13}hl + 2b^*c^*U_{23}kl))$$

Table 3. Bond Lengths( $\text{\AA}$ )

| atom  | atom  | distance | atom  | atom  | distance |
|-------|-------|----------|-------|-------|----------|
| Ni(1) | N(1)  | 2.100(5) | Ni(1) | N(2)  | 2.090(4) |
| Ni(1) | N(3)  | 2.100(4) | Ni(1) | N(5)  | 2.066(4) |
| Ni(1) | N(7)  | 2.083(4) | Ni(1) | N(9)  | 2.117(4) |
| Ni(2) | N(11) | 2.102(5) | Ni(2) | N(12) | 2.102(5) |
| Ni(2) | N(13) | 2.093(5) | Ni(2) | N(15) | 2.071(5) |
| Ni(2) | N(17) | 2.079(5) | Ni(2) | N(19) | 2.090(5) |
| N(1)  | C(1)  | 1.327(7) | N(1)  | C(5)  | 1.347(7) |
| N(2)  | C(6)  | 1.334(7) | N(2)  | C(10) | 1.321(8) |
| N(3)  | C(11) | 1.322(6) | N(3)  | C(13) | 1.384(7) |
| N(4)  | C(11) | 1.343(6) | N(4)  | C(14) | 1.375(7) |
| N(4)  | H(13) | 0.96(4)  | N(5)  | C(12) | 1.333(6) |
| N(5)  | C(15) | 1.366(7) | N(6)  | C(12) | 1.349(6) |
| N(6)  | C(16) | 1.372(7) | N(7)  | C(17) | 1.340(6) |
| N(7)  | C(19) | 1.363(6) | N(8)  | C(17) | 1.344(6) |
| N(8)  | C(20) | 1.366(7) | N(9)  | C(18) | 1.327(6) |
| N(9)  | C(21) | 1.374(6) | N(10) | C(18) | 1.338(6) |
| N(10) | C(22) | 1.380(7) | N(10) | H(18) | 0.81(5)  |
| N(11) | C(23) | 1.311(9) | N(11) | C(27) | 1.357(7) |
| N(12) | C(28) | 1.320(8) | N(12) | C(32) | 1.328(8) |
| N(13) | C(33) | 1.343(7) | N(13) | C(35) | 1.374(8) |
| N(14) | C(33) | 1.348(7) | N(14) | C(36) | 1.380(7) |
| N(14) | H(31) | 1.3(1)   | N(15) | C(34) | 1.326(6) |
| N(15) | C(37) | 1.363(7) | N(16) | C(34) | 1.338(7) |
| N(16) | C(38) | 1.381(8) | N(17) | C(39) | 1.330(6) |

Table 3. Bond Lengths( $\text{\AA}$ ) (continued)

| atom  | atom  | distance | atom  | atom  | distance |
|-------|-------|----------|-------|-------|----------|
| N(17) | C(41) | 1.374(7) | N(18) | C(39) | 1.352(7) |
| N(18) | C(42) | 1.367(7) | N(18) | H(36) | 0.96(6)  |
| N(19) | C(40) | 1.344(6) | N(19) | C(43) | 1.364(7) |
| N(20) | C(40) | 1.343(6) | N(20) | C(44) | 1.378(7) |
| C(1)  | C(2)  | 1.374(9) | C(1)  | H(1)  | 0.97(4)  |
| C(2)  | C(3)  | 1.36(1)  | C(2)  | H(2)  | 1.13(8)  |
| C(3)  | C(4)  | 1.36(1)  | C(3)  | H(3)  | 0.87(6)  |
| C(4)  | C(5)  | 1.403(9) | C(4)  | H(4)  | 0.95(6)  |
| C(5)  | C(6)  | 1.457(8) | C(6)  | C(7)  | 1.395(9) |
| C(7)  | C(8)  | 1.39(1)  | C(7)  | H(5)  | 0.97(6)  |
| C(8)  | C(9)  | 1.32(1)  | C(8)  | H(6)  | 0.87(7)  |
| C(9)  | C(10) | 1.38(1)  | C(9)  | H(7)  | 0.96(5)  |
| C(10) | H(8)  | 0.96(4)  | C(11) | C(12) | 1.449(7) |
| C(13) | C(14) | 1.332(8) | C(13) | H(9)  | 0.91(4)  |
| C(14) | H(10) | 0.90(4)  | C(15) | C(16) | 1.356(8) |
| C(15) | H(11) | 0.93(4)  | C(16) | H(12) | 0.92(5)  |
| C(17) | C(18) | 1.436(7) | C(19) | C(20) | 1.351(8) |
| C(19) | H(14) | 0.91(4)  | C(20) | H(15) | 0.87(4)  |
| C(21) | C(22) | 1.328(8) | C(21) | H(16) | 0.92(4)  |
| C(22) | H(17) | 0.85(4)  | C(23) | C(24) | 1.39(1)  |
| C(23) | H(19) | 0.97(5)  | C(24) | C(25) | 1.37(1)  |
| C(24) | H(20) | 1.00(5)  | C(25) | C(26) | 1.37(1)  |
| C(25) | H(21) | 0.97(6)  | C(26) | C(27) | 1.38(1)  |
| C(26) | H(22) | 0.93(6)  | C(27) | C(28) | 1.444(9) |

Table 3. Bond Lengths( $\text{\AA}$ ) (continued)

| atom  | atom  | distance | atom  | atom  | distance  |
|-------|-------|----------|-------|-------|-----------|
| C(28) | C(29) | 1.41(1)  | C(29) | C(30) | 1.33(1)   |
| C(29) | H(23) | 0.86(6)  | C(30) | C(31) | 1.36(1)   |
| C(30) | H(24) | 0.91(7)  | C(31) | C(32) | 1.383(10) |
| C(31) | H(25) | 1.13(8)  | C(32) | H(26) | 0.99(5)   |
| C(33) | C(34) | 1.434(8) | C(35) | C(36) | 1.352(8)  |
| C(35) | H(27) | 0.97(4)  | C(36) | H(28) | 1.00(5)   |
| C(37) | C(38) | 1.345(9) | C(37) | H(29) | 0.96(4)   |
| C(38) | H(30) | 0.86(4)  | C(39) | C(40) | 1.457(7)  |
| C(41) | C(42) | 1.333(8) | C(41) | H(32) | 0.93(5)   |
| C(42) | H(33) | 0.96(5)  | C(43) | C(44) | 1.342(8)  |
| C(43) | H(34) | 0.86(4)  | C(44) | H(35) | 0.91(5)   |

Table 4. Bond Angles(°)

| atom  | atom  | atom  | angle    | atom  | atom  | atom  | angle    |
|-------|-------|-------|----------|-------|-------|-------|----------|
| N(1)  | Ni(1) | N(2)  | 77.9(2)  | N(1)  | Ni(1) | N(3)  | 91.3(2)  |
| N(1)  | Ni(1) | N(5)  | 169.3(2) | N(1)  | Ni(1) | N(7)  | 92.9(2)  |
| N(1)  | Ni(1) | N(9)  | 93.4(2)  | N(2)  | Ni(1) | N(3)  | 100.7(2) |
| N(2)  | Ni(1) | N(5)  | 97.6(2)  | N(2)  | Ni(1) | N(7)  | 164.5(2) |
| N(2)  | Ni(1) | N(9)  | 88.2(2)  | N(3)  | Ni(1) | N(5)  | 80.0(2)  |
| N(3)  | Ni(1) | N(7)  | 91.9(2)  | N(3)  | Ni(1) | N(9)  | 170.6(2) |
| N(5)  | Ni(1) | N(7)  | 93.5(2)  | N(5)  | Ni(1) | N(9)  | 96.1(2)  |
| N(7)  | Ni(1) | N(9)  | 79.8(2)  | N(11) | Ni(2) | N(12) | 77.6(2)  |
| N(11) | Ni(2) | N(13) | 101.1(2) | N(11) | Ni(2) | N(15) | 172.7(2) |
| N(11) | Ni(2) | N(17) | 94.7(2)  | N(11) | Ni(2) | N(19) | 89.5(2)  |
| N(12) | Ni(2) | N(13) | 91.5(2)  | N(12) | Ni(2) | N(15) | 95.1(2)  |
| N(12) | Ni(2) | N(17) | 172.3(2) | N(12) | Ni(2) | N(19) | 99.7(2)  |
| N(13) | Ni(2) | N(15) | 79.0(2)  | N(13) | Ni(2) | N(17) | 89.6(2)  |
| N(13) | Ni(2) | N(19) | 166.1(2) | N(15) | Ni(2) | N(17) | 92.7(2)  |
| N(15) | Ni(2) | N(19) | 91.6(2)  | N(17) | Ni(2) | N(19) | 80.4(2)  |
| Ni(1) | N(1)  | C(1)  | 125.6(4) | Ni(1) | N(1)  | C(5)  | 114.4(4) |
| C(1)  | N(1)  | C(5)  | 119.7(6) | Ni(1) | N(2)  | C(6)  | 114.5(4) |
| Ni(1) | N(2)  | C(10) | 125.3(5) | C(6)  | N(2)  | C(10) | 118.4(6) |
| Ni(1) | N(3)  | C(11) | 110.4(4) | Ni(1) | N(3)  | C(13) | 142.2(4) |
| C(11) | N(3)  | C(13) | 105.4(5) | C(11) | N(4)  | C(14) | 105.2(5) |
| C(11) | N(4)  | H(13) | 129(2)   | C(14) | N(4)  | H(13) | 124(2)   |
| Ni(1) | N(5)  | C(12) | 112.5(4) | Ni(1) | N(5)  | C(15) | 143.2(5) |
| C(12) | N(5)  | C(15) | 102.8(5) | C(12) | N(6)  | C(16) | 101.8(5) |
| Ni(1) | N(7)  | C(17) | 112.9(4) | Ni(1) | N(7)  | C(19) | 142.2(4) |

Table 4. Bond Angles(°) (continued)

| atom  | atom  | atom  | angle    | atom  | atom  | atom  | angle    |
|-------|-------|-------|----------|-------|-------|-------|----------|
| C(17) | N(7)  | C(19) | 104.4(5) | C(17) | N(8)  | C(20) | 102.0(5) |
| Ni(1) | N(9)  | C(18) | 110.8(4) | Ni(1) | N(9)  | C(21) | 144.0(4) |
| C(18) | N(9)  | C(21) | 104.9(5) | C(18) | N(10) | C(22) | 106.1(5) |
| C(18) | N(10) | H(18) | 130(4)   | C(22) | N(10) | H(18) | 123(4)   |
| Ni(2) | N(11) | C(23) | 124.9(5) | Ni(2) | N(11) | C(27) | 114.1(5) |
| C(23) | N(11) | C(27) | 119.9(7) | Ni(2) | N(12) | C(28) | 115.0(5) |
| Ni(2) | N(12) | C(32) | 125.7(5) | C(28) | N(12) | C(32) | 118.5(7) |
| Ni(2) | N(13) | C(33) | 112.4(4) | Ni(2) | N(13) | C(35) | 142.6(5) |
| C(33) | N(13) | C(35) | 104.4(6) | C(33) | N(14) | C(36) | 105.3(6) |
| C(33) | N(14) | H(31) | 129(3)   | C(36) | N(14) | H(31) | 125(3)   |
| Ni(2) | N(15) | C(34) | 114.3(4) | Ni(2) | N(15) | C(37) | 140.7(5) |
| C(34) | N(15) | C(37) | 104.7(6) | C(34) | N(16) | C(38) | 102.7(6) |
| Ni(2) | N(17) | C(39) | 112.4(4) | Ni(2) | N(17) | C(41) | 142.8(5) |
| C(39) | N(17) | C(41) | 104.5(5) | C(39) | N(18) | C(42) | 105.4(5) |
| C(39) | N(18) | H(36) | 134(3)   | C(42) | N(18) | H(36) | 118(3)   |
| Ni(2) | N(19) | C(40) | 111.9(4) | Ni(2) | N(19) | C(43) | 145.4(5) |
| C(40) | N(19) | C(43) | 102.7(5) | C(40) | N(20) | C(44) | 102.4(5) |
| N(1)  | C(1)  | C(2)  | 123.7(7) | N(1)  | C(1)  | H(1)  | 114(2)   |
| C(2)  | C(1)  | H(1)  | 122(3)   | C(1)  | C(2)  | C(3)  | 116.8(8) |
| C(1)  | C(2)  | H(2)  | 126(4)   | C(3)  | C(2)  | H(2)  | 116(4)   |
| C(2)  | C(3)  | C(4)  | 121.1(8) | C(2)  | C(3)  | H(3)  | 118(4)   |
| C(4)  | C(3)  | H(3)  | 120(4)   | C(3)  | C(4)  | C(5)  | 119.5(8) |
| C(3)  | C(4)  | H(4)  | 127(4)   | C(5)  | C(4)  | H(4)  | 112(4)   |
| N(1)  | C(5)  | C(4)  | 119.0(7) | N(1)  | C(5)  | C(6)  | 115.6(6) |



Table 4. Bond Angles(°) (continued)

| atom  | atom  | atom  | angle     | atom  | atom  | atom  | angle     |
|-------|-------|-------|-----------|-------|-------|-------|-----------|
| C(4)  | C(5)  | C(6)  | 125.4(7)  | N(2)  | C(6)  | C(5)  | 115.8(6)  |
| N(2)  | C(6)  | C(7)  | 122.2(7)  | C(5)  | C(6)  | C(7)  | 122.0(8)  |
| C(6)  | C(7)  | C(8)  | 116.6(9)  | C(6)  | C(7)  | H(5)  | 116(4)    |
| C(8)  | C(7)  | H(5)  | 126(4)    | C(7)  | C(8)  | C(9)  | 121.2(10) |
| C(7)  | C(8)  | H(6)  | 117(5)    | C(9)  | C(8)  | H(6)  | 120(5)    |
| C(8)  | C(9)  | C(10) | 119.1(10) | C(8)  | C(9)  | H(7)  | 133(3)    |
| C(10) | C(9)  | H(7)  | 107(3)    | N(2)  | C(10) | C(9)  | 122.6(8)  |
| N(2)  | C(10) | H(8)  | 113(2)    | C(9)  | C(10) | H(8)  | 123(2)    |
| N(3)  | C(11) | N(4)  | 112.2(5)  | N(3)  | C(11) | C(12) | 118.9(6)  |
| N(4)  | C(11) | C(12) | 128.9(6)  | N(5)  | C(12) | N(6)  | 116.1(5)  |
| N(5)  | C(12) | C(11) | 116.3(6)  | N(6)  | C(12) | C(11) | 127.5(6)  |
| N(3)  | C(13) | C(14) | 108.6(6)  | N(3)  | C(13) | H(9)  | 118(3)    |
| C(14) | C(13) | H(9)  | 132(3)    | N(4)  | C(14) | C(13) | 108.6(6)  |
| N(4)  | C(14) | H(10) | 119(3)    | C(13) | C(14) | H(10) | 131(3)    |
| N(5)  | C(15) | C(16) | 109.3(6)  | N(5)  | C(15) | H(11) | 116(2)    |
| C(16) | C(15) | H(11) | 133(3)    | N(6)  | C(16) | C(15) | 110.0(6)  |
| N(6)  | C(16) | H(12) | 118(3)    | C(15) | C(16) | H(12) | 130(3)    |
| N(7)  | C(17) | N(8)  | 114.7(5)  | N(7)  | C(17) | C(18) | 116.6(5)  |
| N(8)  | C(17) | C(18) | 128.7(6)  | N(9)  | C(18) | N(10) | 111.8(5)  |
| N(9)  | C(18) | C(17) | 119.5(5)  | N(10) | C(18) | C(17) | 128.7(6)  |
| N(7)  | C(19) | C(20) | 107.7(6)  | N(7)  | C(19) | H(14) | 116(2)    |
| C(20) | C(19) | H(14) | 134(2)    | N(8)  | C(20) | C(19) | 111.2(6)  |
| N(8)  | C(20) | H(15) | 117(3)    | C(19) | C(20) | H(15) | 130(3)    |
| N(9)  | C(21) | C(22) | 110.1(6)  | N(9)  | C(21) | H(16) | 119(2)    |

Table 4. Bond Angles(°) (continued)

| atom  | atom  | atom  | angle     | atom  | atom  | atom  | angle     |
|-------|-------|-------|-----------|-------|-------|-------|-----------|
| C(22) | C(21) | H(16) | 130(2)    | N(10) | C(22) | C(21) | 107.1(6)  |
| N(10) | C(22) | H(17) | 117(3)    | C(21) | C(22) | H(17) | 135(3)    |
| N(11) | C(23) | C(24) | 123.5(8)  | N(11) | C(23) | H(19) | 116(3)    |
| C(24) | C(23) | H(19) | 118(3)    | C(23) | C(24) | C(25) | 117.6(9)  |
| C(23) | C(24) | H(20) | 119(3)    | C(25) | C(24) | H(20) | 123(3)    |
| C(24) | C(25) | C(26) | 119.0(10) | C(24) | C(25) | H(21) | 118(4)    |
| C(26) | C(25) | H(21) | 122(4)    | C(25) | C(26) | C(27) | 121.6(10) |
| C(25) | C(26) | H(22) | 127(5)    | C(27) | C(26) | H(22) | 111(4)    |
| N(11) | C(27) | C(26) | 118.4(8)  | N(11) | C(27) | C(28) | 115.5(7)  |
| C(26) | C(27) | C(28) | 126.1(8)  | N(12) | C(28) | C(27) | 116.8(7)  |
| N(12) | C(28) | C(29) | 120.4(8)  | C(27) | C(28) | C(29) | 122.7(9)  |
| C(28) | C(29) | C(30) | 119.4(10) | C(28) | C(29) | H(23) | 104(5)    |
| C(30) | C(29) | H(23) | 135(5)    | C(29) | C(30) | C(31) | 121(1)    |
| C(29) | C(30) | H(24) | 123(6)    | C(31) | C(30) | H(24) | 114(5)    |
| C(30) | C(31) | C(32) | 116.6(10) | C(30) | C(31) | H(25) | 126(4)    |
| C(32) | C(31) | H(25) | 115(4)    | N(12) | C(32) | C(31) | 123.8(8)  |
| N(12) | C(32) | H(26) | 113(3)    | C(31) | C(32) | H(26) | 122(3)    |
| N(13) | C(33) | N(14) | 112.7(6)  | N(13) | C(33) | C(34) | 117.5(6)  |
| N(14) | C(33) | C(34) | 129.7(7)  | N(15) | C(34) | N(16) | 114.5(6)  |
| N(15) | C(34) | C(33) | 116.7(7)  | N(16) | C(34) | C(33) | 128.7(6)  |
| N(13) | C(35) | C(36) | 110.0(6)  | N(13) | C(35) | H(27) | 111(3)    |
| C(36) | C(35) | H(27) | 137(3)    | N(14) | C(36) | C(35) | 107.7(6)  |
| N(14) | C(36) | H(28) | 115(3)    | C(35) | C(36) | H(28) | 136(3)    |
| N(15) | C(37) | C(38) | 108.4(6)  | N(15) | C(37) | H(29) | 117(3)    |

Table 4. Bond Angles(°) (continued)

| atom  | atom  | atom  | angle    | atom  | atom  | atom  | angle    |
|-------|-------|-------|----------|-------|-------|-------|----------|
| C(38) | C(37) | H(29) | 132(3)   | N(16) | C(38) | C(37) | 109.7(6) |
| N(16) | C(38) | H(30) | 123(3)   | C(37) | C(38) | H(30) | 127(3)   |
| N(17) | C(39) | N(18) | 112.1(5) | N(17) | C(39) | C(40) | 117.7(6) |
| N(18) | C(39) | C(40) | 130.1(6) | N(19) | C(40) | N(20) | 115.4(5) |
| N(19) | C(40) | C(39) | 117.2(6) | N(20) | C(40) | C(39) | 127.4(6) |
| N(17) | C(41) | C(42) | 110.1(6) | N(17) | C(41) | H(32) | 116(3)   |
| C(42) | C(41) | H(32) | 132(3)   | N(18) | C(42) | C(41) | 107.9(6) |
| N(18) | C(42) | H(33) | 117(3)   | C(41) | C(42) | H(33) | 134(3)   |
| N(19) | C(43) | C(44) | 110.1(6) | N(19) | C(43) | H(34) | 114(3)   |
| C(44) | C(43) | H(34) | 135(3)   | N(20) | C(44) | C(43) | 109.4(6) |
| N(20) | C(44) | H(35) | 121(3)   | C(43) | C(44) | H(35) | 128(3)   |
