# Supplementary material
Source: PubMed Central journal article supplement (PMC122701)
Supplement: pnas_072661699_3.pdf [file pnas_072661699_3.pdf]

## EXPERIMENTAL DETAILS

### A. Crystal Data

|                                                                        |                                                                                                                                                           |
|------------------------------------------------------------------------|-----------------------------------------------------------------------------------------------------------------------------------------------------------|
| Empirical Formula                                                      | $C_{36}H_{30}N_{24}Ru_2$                                                                                                                                  |
| Formula Weight                                                         | 1000.93                                                                                                                                                   |
| Crystal Color, Habit                                                   | deep, plate                                                                                                                                               |
| Crystal Dimensions                                                     | 0.12 X 0.25 X 0.26 mm                                                                                                                                     |
| Crystal System                                                         | monoclinic                                                                                                                                                |
| Lattice Type                                                           | Primitive                                                                                                                                                 |
| No. of Reflections Used for Unit Cell Determination ( $2\theta$ range) | 25 ( 58.9 - 59.9° )                                                                                                                                       |
| Omega Scan Peak Width at Half-height                                   | 0.36°                                                                                                                                                     |
| Lattice Parameters                                                     | $a = 12.2426(8) \text{ \AA}$<br>$b = 12.643(1) \text{ \AA}$<br>$c = 13.2066(6) \text{ \AA}$<br>$\beta = 92.738(4)^\circ$<br>$V = 2041.8(2) \text{ \AA}^3$ |
| Space Group                                                            | $P2_1$ (#4)                                                                                                                                               |
| Z value                                                                | 2                                                                                                                                                         |
| $D_{calc}$                                                             | 1.628 g/cm <sup>3</sup>                                                                                                                                   |
| $F_{000}$                                                              | 1004.00                                                                                                                                                   |
| $\mu(CuK\alpha)$                                                       | 65.12 cm <sup>-1</sup>                                                                                                                                    |

### B. Intensity Measurements

|                |                                                                           |
|----------------|---------------------------------------------------------------------------|
| Diffractometer | Rigaku AFC7R (rotating anode)                                             |
| Radiation      | $CuK\alpha$ ( $\lambda = 1.54178 \text{ \AA}$ )<br>graphite monochromated |
| Attenuator     | Ni foil (factor = 9.14)                                                   |

|                              |                                                                                                                                                         |
|------------------------------|---------------------------------------------------------------------------------------------------------------------------------------------------------|
| Temperature                  | 23.0 °C                                                                                                                                                 |
| Collimator Size              | 1.0 mm                                                                                                                                                  |
| Take-off Angle               | 6.0°                                                                                                                                                    |
| Detector Aperture            | 9.0 mm horizontal<br>13.0 mm vertical                                                                                                                   |
| Crystal to Detector Distance | 235 mm                                                                                                                                                  |
| Scan Type                    | $\omega$ - $2\theta$                                                                                                                                    |
| Scan Rate                    | 16.0°/min (in $\omega$ ) (up to 5 scans)                                                                                                                |
| Scan Width                   | $(1.68 + 0.30 \tan \theta)^\circ$                                                                                                                       |
| $2\theta_{max}$              | 120.2°                                                                                                                                                  |
| No. of Reflections Measured  | Total: 3360<br>Unique: 3194 ( $R_{int} = 0.041$ )                                                                                                       |
| Corrections                  | Lorentz-polarization<br>Absorption<br>(trans. factors: 0.5343 - 0.9994)<br>Decay (0.96% increase)<br>Secondary Extinction<br>(coefficient: 6.37500e-07) |

### C. Structure Solution and Refinement

|                                                                        |                                                                              |
|------------------------------------------------------------------------|------------------------------------------------------------------------------|
| Structure Solution                                                     | Direct Methods (SHELXS-86)                                                   |
| Refinement                                                             | Full-matrix least-squares                                                    |
| Function Minimized                                                     | $\Sigma w( F_o  -  F_c )^2$                                                  |
| Least Squares Weights                                                  | $w = \frac{1}{\sigma^2(F_o)} = [\sigma_c^2(F_o) + \frac{v^2}{4} F_o^2]^{-1}$ |
| p-factor                                                               | 0.0030                                                                       |
| Anomalous Dispersion                                                   | All non-hydrogen atoms                                                       |
| No. of Observations ( $I > 3.00\sigma(I)$ , $2\theta < 120.20^\circ$ ) | 2776                                                                         |
| No. Variables                                                          | 560                                                                          |
| Reflection/Parameter Ratio                                             | 4.96                                                                         |
| Residuals: R; Rw                                                       | 0.042 ; 0.067                                                                |

|                                 |                            |
|---------------------------------|----------------------------|
| Residuals: R1                   | 0.042                      |
| No. of Reflections to calc R1   | 2636                       |
| Goodness of Fit Indicator       | 1.75                       |
| Max Shift/Error in Final Cycle  | 0.684                      |
| Maximum peak in Final Diff. Map | $0.72 e^{-}/\text{\AA}^3$  |
| Minimum peak in Final Diff. Map | $-1.46 e^{-}/\text{\AA}^3$ |

Table 1. Atomic coordinates and  $B_{iso}/B_{eq}$ 

| atom  | x           | y           | z          | $B_{eq}$ |
|-------|-------------|-------------|------------|----------|
| Ru(1) | -0.39091(6) | 0.19991(10) | 0.90562(6) | 3.06(2)  |
| Ru(2) | 0.10811(7)  | 0.00990(10) | 0.40632(6) | 3.46(2)  |
| N(1)  | -0.5527(7)  | 0.1511(8)   | 0.8665(8)  | 4.3(2)   |
| N(2)  | -0.7115(8)  | 0.1991(8)   | 0.8005(8)  | 4.5(2)   |
| N(3)  | -0.4597(8)  | 0.3398(6)   | 0.8465(5)  | 2.8(1)   |
| N(4)  | -0.5966(8)  | 0.4222(7)   | 0.7633(8)  | 4.1(2)   |
| N(5)  | -0.3324(7)  | 0.0582(6)   | 0.9471(6)  | 2.8(1)   |
| N(6)  | -0.2493(9)  | -0.0921(8)  | 0.8992(8)  | 4.4(2)   |
| N(7)  | -0.3431(9)  | 0.1447(7)   | 0.7691(7)  | 4.2(2)   |
| N(8)  | -0.3088(9)  | -0.0021(9)  | 0.6795(8)  | 4.5(2)   |
| N(9)  | -0.2446(7)  | 0.2592(7)   | 0.9704(5)  | 2.9(1)   |
| N(10) | -0.1594(9)  | 0.3230(9)   | 1.1130(7)  | 4.7(2)   |
| N(11) | -0.4329(7)  | 0.2388(7)   | 1.0396(6)  | 3.5(1)   |
| N(12) | -0.3953(9)  | 0.3092(8)   | 1.1969(8)  | 5.1(2)   |
| N(13) | 0.1816(8)   | 0.1593(7)   | 0.4453(8)  | 3.9(2)   |
| N(14) | 0.2627(9)   | 0.3047(7)   | 0.4051(7)  | 3.7(2)   |
| N(15) | 0.1553(6)   | 0.0730(7)   | 0.2660(7)  | 3.3(1)   |
| N(16) | 0.2015(8)   | 0.2128(7)   | 0.1795(6)  | 3.4(2)   |
| N(17) | -0.0402(7)  | 0.0574(6)   | 0.3567(5)  | 2.6(1)   |
| N(18) | -0.2115(8)  | 0.0210(8)   | 0.3008(6)  | 4.0(2)   |
| N(19) | 0.0485(7)   | -0.1233(8)  | 0.3458(8)  | 4.5(2)   |
| N(20) | -0.0960(9)  | -0.2067(8)  | 0.2646(7)  | 4.4(2)   |
| N(21) | 0.2518(7)   | -0.0523(7)  | 0.4715(8)  | 3.8(2)   |
| N(22) | 0.3428(7)   | -0.1072(7)  | 0.6077(8)  | 3.7(2)   |

Table 1. Atomic coordinates and  $B_{iso}/B_{eq}$  (continued)

| atom  | x           | y          | z          | $B_{eq}$ |
|-------|-------------|------------|------------|----------|
| N(23) | 0.0547(6)   | -0.0288(7) | 0.5540(5)  | 3.3(1)   |
| N(24) | 0.1035(7)   | -0.0905(7) | 0.7043(6)  | 3.1(2)   |
| C(1)  | -0.612(1)   | 0.0707(9)  | 0.8584(10) | 5.4(3)   |
| C(2)  | -0.709(1)   | 0.090(1)   | 0.828(1)   | 6.1(3)   |
| C(3)  | -0.421(1)   | 0.4447(9)  | 0.826(1)   | 4.6(3)   |
| C(4)  | -0.513(1)   | 0.498(1)   | 0.782(1)   | 5.7(3)   |
| C(5)  | -0.6072(9)  | 0.2273(9)  | 0.8147(8)  | 3.4(2)   |
| C(6)  | -0.555(1)   | 0.3274(9)  | 0.7988(9)  | 3.4(2)   |
| C(7)  | -0.296(1)   | -0.002(1)  | 1.0315(9)  | 5.0(3)   |
| C(8)  | -0.251(1)   | -0.084(1)  | 1.009(1)   | 5.2(3)   |
| C(9)  | -0.366(1)   | 0.167(1)   | 0.6655(9)  | 4.7(3)   |
| C(10) | -0.334(1)   | 0.078(1)   | 0.613(1)   | 4.5(3)   |
| C(11) | -0.2938(9)  | -0.0049(8) | 0.8614(7)  | 3.2(2)   |
| C(12) | -0.3096(8)  | 0.0433(8)  | 0.7683(9)  | 3.1(2)   |
| C(13) | -0.1420(10) | 0.2708(9)  | 0.9498(9)  | 3.8(2)   |
| C(14) | -0.0838(9)  | 0.306(1)   | 1.0378(9)  | 5.1(3)   |
| C(15) | -0.5336(8)  | 0.2388(8)  | 1.1089(8)  | 3.5(2)   |
| C(16) | -0.501(1)   | 0.285(1)   | 1.1950(9)  | 4.2(2)   |
| C(17) | -0.2528(8)  | 0.2922(7)  | 1.0674(7)  | 2.6(2)   |
| C(18) | -0.3678(9)  | 0.2786(8)  | 1.112(1)   | 4.4(2)   |
| C(19) | 0.2078(10)  | 0.2039(10) | 0.5353(9)  | 4.1(2)   |
| C(20) | 0.261(1)    | 0.3043(9)  | 0.5033(9)  | 4.5(2)   |
| C(21) | 0.1424(10)  | 0.0477(8)  | 0.1708(9)  | 3.8(2)   |
| C(22) | 0.166(1)    | 0.131(1)   | 0.1146(8)  | 5.1(3)   |

Table 1. Atomic coordinates and  $B_{iso}/B_{eq}$  (continued)

| atom  | x           | y          | z          | $B_{eq}$ |
|-------|-------------|------------|------------|----------|
| C(23) | 0.2061(9)   | 0.2129(8)  | 0.3788(8)  | 3.6(2)   |
| C(24) | 0.189(1)    | 0.1755(9)  | 0.2715(8)  | 3.9(2)   |
| C(25) | -0.1100(9)  | 0.1515(8)  | 0.3771(9)  | 3.5(2)   |
| C(26) | -0.2147(9)  | 0.1199(10) | 0.330(1)   | 4.1(2)   |
| C(27) | 0.0729(9)   | -0.2245(9) | 0.3311(10) | 3.6(2)   |
| C(28) | -0.0089(10) | -0.2710(8) | 0.2764(7)  | 3.2(2)   |
| C(29) | -0.113(1)   | -0.0194(9) | 0.3242(7)  | 3.1(2)   |
| C(30) | -0.0633(9)  | -0.1211(9) | 0.3119(9)  | 3.3(2)   |
| C(31) | 0.3648(10)  | -0.069(1)  | 0.452(1)   | 4.5(2)   |
| C(32) | 0.4149(10)  | -0.106(1)  | 0.5375(9)  | 4.8(2)   |
| C(33) | -0.0277(7)  | -0.0337(9) | 0.5883(8)  | 3.9(2)   |
| C(34) | -0.0088(9)  | -0.066(1)  | 0.6913(10) | 4.1(2)   |
| C(35) | 0.2421(9)   | -0.077(1)  | 0.571(1)   | 4.6(2)   |
| C(36) | 0.1488(8)   | -0.0675(8) | 0.6086(5)  | 2.6(1)   |
| H(1)  | -0.7721     | 0.2350     | 0.7663     | 4.9      |
| H(2)  | -0.5854     | -0.0005    | 0.8721     | 5.6      |
| H(3)  | -0.7775     | 0.0397     | 0.8412     | 7.1      |
| H(4)  | -0.3369     | 0.4721     | 0.8386     | 6.9      |
| H(5)  | -0.5115     | 0.5756     | 0.7577     | 7.2      |
| H(6)  | -0.2251     | -0.1534    | 0.8629     | 4.1      |
| H(7)  | -0.3128     | 0.0170     | 1.1028     | 4.3      |
| H(8)  | -0.2161     | -0.1327    | 1.0525     | 4.1      |
| H(9)  | -0.3867     | 0.2323     | 0.6387     | 3.7      |
| H(10) | -0.3233     | 0.0738     | 0.5400     | 4.5      |

Table 1. Atomic coordinates and  $B_{iso}/B_{eq}$  (continued)

| atom  | x       | y       | z      | $B_{eq}$ |
|-------|---------|---------|--------|----------|
| H(11) | -0.1452 | 0.3505  | 1.1836 | 5.5      |
| H(12) | -0.1136 | 0.2535  | 0.8816 | 4.1      |
| H(13) | -0.0079 | 0.3304  | 1.0420 | 4.6      |
| H(14) | -0.6099 | 0.2143  | 1.0888 | 4.2      |
| H(15) | -0.5411 | 0.2979  | 1.2517 | 4.7      |
| H(16) | 0.2974  | 0.3526  | 0.3569 | 4.3      |
| H(17) | 0.1989  | 0.1747  | 0.6047 | 6.0      |
| H(18) | 0.2962  | 0.3653  | 0.5489 | 6.5      |
| H(19) | 0.1125  | -0.0242 | 0.1367 | 5.8      |
| H(20) | 0.1457  | 0.1411  | 0.0436 | 5.3      |
| H(21) | -0.2709 | -0.0233 | 0.2738 | 4.6      |
| H(22) | -0.0903 | 0.2185  | 0.4119 | 4.0      |
| H(23) | -0.2761 | 0.1644  | 0.3127 | 3.8      |
| H(24) | 0.1371  | -0.2607 | 0.3552 | 2.8      |
| H(25) | -0.0127 | -0.3416 | 0.2525 | 3.7      |
| H(26) | 0.3557  | -0.1318 | 0.6755 | 3.8      |
| H(27) | 0.4050  | -0.0630 | 0.3924 | 5.4      |
| H(28) | 0.4983  | -0.1116 | 0.5515 | 6.9      |
| H(29) | -0.0960 | -0.0140 | 0.5524 | 4.3      |
| H(30) | -0.0685 | -0.0764 | 0.7445 | 4.3      |

$$B_{eq} = \frac{8}{3}\pi^2(U_{11}(aa^*)^2 + U_{22}(bb^*)^2 + U_{33}(cc^*)^2 + 2U_{12}aa^*bb^* \cos \gamma + 2U_{13}aa^*cc^* \cos \beta + 2U_{23}bb^*cc^* \cos \alpha)$$

Table 2. Anisotropic Displacement Parameters

| atom  | U <sub>11</sub> | U <sub>22</sub> | U <sub>33</sub> | U <sub>12</sub> | U <sub>13</sub> | U <sub>23</sub> |
|-------|-----------------|-----------------|-----------------|-----------------|-----------------|-----------------|
| Ru(1) | 0.0363(4)       | 0.0316(4)       | 0.0476(5)       | 0.0040(4)       | -0.0076(4)      | -0.0044(3)      |
| Ru(2) | 0.0505(6)       | 0.0362(5)       | 0.0426(5)       | -0.0079(4)      | -0.0189(5)      | 0.0095(3)       |
| N(1)  | 0.034(3)        | 0.049(4)        | 0.079(6)        | 0.003(3)        | -0.010(4)       | 0.014(4)        |
| N(2)  | 0.047(4)        | 0.043(4)        | 0.081(7)        | -0.020(4)       | -0.016(5)       | 0.019(5)        |
| N(3)  | 0.059(5)        | 0.028(3)        | 0.018(3)        | 0.006(3)        | -0.001(3)       | -0.015(3)       |
| N(4)  | 0.046(5)        | 0.035(4)        | 0.073(6)        | 0.024(3)        | -0.020(5)       | -0.019(4)       |
| N(5)  | 0.044(4)        | 0.039(3)        | 0.026(3)        | 0.016(3)        | 0.017(3)        | -0.009(3)       |
| N(6)  | 0.067(6)        | 0.041(5)        | 0.059(4)        | 0.021(4)        | -0.012(5)       | -0.004(4)       |
| N(7)  | 0.094(7)        | 0.026(4)        | 0.035(3)        | 0.017(4)        | -0.025(4)       | 0.005(3)        |
| N(8)  | 0.052(6)        | 0.051(6)        | 0.069(5)        | 0.003(5)        | 0.006(5)        | -0.008(4)       |
| N(9)  | 0.049(3)        | 0.046(5)        | 0.014(3)        | -0.002(3)       | -0.017(3)       | 0.004(3)        |
| N(10) | 0.061(5)        | 0.087(8)        | 0.028(4)        | -0.008(6)       | -0.013(4)       | -0.013(5)       |
| N(11) | 0.037(3)        | 0.032(4)        | 0.068(3)        | 0.005(3)        | 0.037(3)        | 0.000(3)        |
| N(12) | 0.066(5)        | 0.052(6)        | 0.071(5)        | -0.010(5)       | -0.039(5)       | 0.013(4)        |
| N(13) | 0.056(6)        | 0.032(3)        | 0.058(4)        | 0.004(3)        | -0.022(5)       | -0.001(3)       |
| N(14) | 0.060(6)        | 0.035(4)        | 0.043(3)        | -0.001(4)       | -0.016(4)       | 0.004(4)        |
| N(15) | 0.018(3)        | 0.047(4)        | 0.061(3)        | 0.007(3)        | -0.004(3)       | 0.019(3)        |
| N(16) | 0.063(5)        | 0.033(4)        | 0.032(4)        | -0.008(4)       | -0.013(4)       | 0.009(3)        |
| N(17) | 0.058(3)        | 0.020(3)        | 0.018(3)        | 0.003(3)        | -0.013(3)       | 0.011(3)        |
| N(18) | 0.064(5)        | 0.046(4)        | 0.037(4)        | -0.014(4)       | -0.026(4)       | 0.020(4)        |
| N(19) | 0.025(4)        | 0.044(4)        | 0.098(7)        | -0.003(3)       | -0.022(4)       | -0.014(4)       |
| N(20) | 0.057(6)        | 0.057(5)        | 0.054(6)        | 0.019(4)        | -0.003(5)       | -0.027(4)       |
| N(21) | 0.035(3)        | 0.028(4)        | 0.081(5)        | -0.018(3)       | 0.001(3)        | 0.014(4)        |
| N(22) | 0.031(4)        | 0.039(5)        | 0.069(6)        | -0.002(4)       | -0.016(3)       | 0.011(4)        |



Table 2. Anisotropic Displacement Parameters (continued)

| atom  | $U_{11}$ | $U_{22}$ | $U_{33}$ | $U_{12}$  | $U_{13}$  | $U_{23}$  |
|-------|----------|----------|----------|-----------|-----------|-----------|
| N(23) | 0.033(3) | 0.047(5) | 0.041(2) | -0.015(3) | -0.038(2) | 0.020(3)  |
| N(24) | 0.031(3) | 0.048(5) | 0.039(4) | -0.021(3) | 0.015(3)  | 0.020(4)  |
| C(1)  | 0.116(8) | 0.025(5) | 0.060(6) | -0.012(4) | -0.049(6) | 0.008(4)  |
| C(2)  | 0.110(8) | 0.036(5) | 0.08(1)  | -0.022(7) | -0.038(9) | -0.001(6) |
| C(3)  | 0.083(8) | 0.029(4) | 0.062(7) | -0.005(5) | -0.010(7) | 0.001(5)  |
| C(4)  | 0.062(7) | 0.035(6) | 0.12(1)  | -0.001(4) | 0.004(7)  | -0.012(6) |
| C(5)  | 0.044(4) | 0.036(5) | 0.048(6) | -0.006(4) | -0.014(5) | -0.010(4) |
| C(6)  | 0.051(5) | 0.028(4) | 0.048(5) | 0.010(3)  | -0.003(4) | -0.008(4) |
| C(7)  | 0.089(9) | 0.060(7) | 0.039(5) | 0.016(6)  | -0.032(6) | 0.002(4)  |
| C(8)  | 0.082(9) | 0.059(7) | 0.057(4) | 0.014(6)  | 0.003(6)  | 0.031(5)  |
| C(9)  | 0.082(9) | 0.066(7) | 0.030(4) | -0.002(7) | -0.015(6) | 0.003(5)  |
| C(10) | 0.053(7) | 0.058(6) | 0.061(7) | -0.012(5) | -0.010(6) | -0.006(4) |
| C(11) | 0.051(5) | 0.034(4) | 0.038(4) | 0.019(4)  | -0.006(4) | -0.030(3) |
| C(12) | 0.030(5) | 0.027(4) | 0.061(4) | 0.000(4)  | -0.006(5) | 0.009(3)  |
| C(13) | 0.046(4) | 0.045(6) | 0.051(6) | 0.004(5)  | -0.016(4) | -0.007(5) |
| C(14) | 0.040(6) | 0.092(8) | 0.060(6) | 0.019(6)  | -0.016(4) | -0.051(6) |
| C(15) | 0.040(5) | 0.040(5) | 0.055(5) | 0.006(4)  | 0.033(4)  | -0.008(4) |
| C(16) | 0.062(5) | 0.045(7) | 0.052(5) | 0.016(5)  | 0.022(5)  | -0.009(5) |
| C(17) | 0.048(4) | 0.024(5) | 0.029(3) | 0.018(4)  | 0.003(3)  | -0.003(4) |
| C(18) | 0.032(4) | 0.027(5) | 0.108(7) | 0.011(4)  | 0.008(4)  | -0.014(5) |
| C(19) | 0.057(6) | 0.042(5) | 0.058(5) | -0.001(5) | 0.000(5)  | -0.011(4) |
| C(20) | 0.087(9) | 0.040(6) | 0.042(3) | -0.019(5) | -0.033(6) | 0.001(5)  |
| C(21) | 0.048(6) | 0.027(5) | 0.069(5) | -0.009(5) | -0.014(6) | -0.004(4) |
| C(22) | 0.11(1)  | 0.056(6) | 0.024(5) | -0.035(7) | -0.018(6) | -0.002(4) |

Table 2. Anisotropic Displacement Parameters (continued)

| atom  | U <sub>11</sub> | U <sub>22</sub> | U <sub>33</sub> | U <sub>12</sub> | U <sub>13</sub> | U <sub>23</sub> |
|-------|-----------------|-----------------|-----------------|-----------------|-----------------|-----------------|
| C(23) | 0.050(6)        | 0.040(5)        | 0.043(4)        | 0.012(4)        | -0.025(4)       | -0.013(3)       |
| C(24) | 0.061(7)        | 0.053(5)        | 0.033(3)        | -0.020(5)       | -0.013(6)       | 0.015(4)        |
| C(25) | 0.035(4)        | 0.032(4)        | 0.064(6)        | -0.001(3)       | -0.008(4)       | -0.003(4)       |
| C(26) | 0.030(4)        | 0.047(5)        | 0.078(8)        | -0.005(5)       | -0.011(5)       | 0.005(6)        |
| C(27) | 0.027(4)        | 0.044(4)        | 0.064(7)        | -0.001(4)       | 0.006(4)        | 0.008(5)        |
| C(28) | 0.057(5)        | 0.024(5)        | 0.040(5)        | -0.007(3)       | 0.001(4)        | -0.011(4)       |
| C(29) | 0.061(5)        | 0.037(4)        | 0.018(4)        | -0.014(3)       | -0.010(4)       | 0.006(4)        |
| C(30) | 0.030(4)        | 0.047(4)        | 0.046(5)        | 0.001(4)        | -0.015(4)       | 0.017(4)        |
| C(31) | 0.039(4)        | 0.067(8)        | 0.065(7)        | -0.004(5)       | 0.009(5)        | -0.006(6)       |
| C(32) | 0.043(6)        | 0.074(7)        | 0.062(5)        | 0.017(5)        | -0.005(4)       | -0.034(5)       |
| C(33) | 0.025(3)        | 0.062(6)        | 0.058(5)        | 0.000(4)        | -0.038(3)       | -0.018(4)       |
| C(34) | 0.040(4)        | 0.049(7)        | 0.064(5)        | 0.000(5)        | -0.024(5)       | 0.001(5)        |
| C(35) | 0.036(4)        | 0.059(8)        | 0.076(6)        | 0.011(5)        | -0.026(4)       | 0.011(6)        |
| C(36) | 0.051(4)        | 0.040(5)        | 0.004(3)        | 0.004(4)        | -0.029(2)       | 0.001(3)        |

The general temperature factor expression:

$$\exp(-2\pi^2(a^*U_{11}h^2 + b^*U_{22}k^2 + c^*U_{33}l^2 + 2a^*b^*U_{12}hk + 2a^*c^*U_{13}hl + 2b^*c^*U_{23}kl))$$

Table 3. Bond Lengths( $\text{\AA}$ )

| atom  | atom  | distance | atom  | atom  | distance  |
|-------|-------|----------|-------|-------|-----------|
| Ru(1) | N(1)  | 2.115(9) | Ru(1) | N(3)  | 2.093(8)  |
| Ru(1) | N(5)  | 1.996(8) | Ru(1) | N(7)  | 2.045(9)  |
| Ru(1) | N(9)  | 2.087(9) | Ru(1) | N(11) | 1.929(9)  |
| Ru(2) | N(13) | 2.144(9) | Ru(2) | N(15) | 2.122(10) |
| Ru(2) | N(17) | 1.993(8) | Ru(2) | N(19) | 1.987(10) |
| Ru(2) | N(21) | 2.076(9) | Ru(2) | N(23) | 2.144(7)  |
| N(1)  | C(1)  | 1.25(2)  | N(1)  | C(5)  | 1.34(1)   |
| N(2)  | C(2)  | 1.42(2)  | N(2)  | C(5)  | 1.33(1)   |
| N(2)  | H(1)  | 0.96     | N(3)  | C(3)  | 1.44(1)   |
| N(3)  | C(6)  | 1.31(1)  | N(4)  | C(4)  | 1.41(2)   |
| N(4)  | C(6)  | 1.38(1)  | N(5)  | C(7)  | 1.40(1)   |
| N(5)  | C(11) | 1.48(1)  | N(6)  | C(8)  | 1.45(2)   |
| N(6)  | C(11) | 1.32(1)  | N(6)  | H(6)  | 0.96      |
| N(7)  | C(9)  | 1.41(1)  | N(7)  | C(12) | 1.35(1)   |
| N(8)  | C(10) | 1.36(2)  | N(8)  | C(12) | 1.31(2)   |
| N(9)  | C(13) | 1.31(2)  | N(9)  | C(17) | 1.36(1)   |
| N(10) | C(14) | 1.41(2)  | N(10) | C(17) | 1.33(1)   |
| N(10) | H(11) | 1.00     | N(11) | C(15) | 1.57(1)   |
| N(11) | C(18) | 1.32(1)  | N(12) | C(16) | 1.33(2)   |
| N(12) | C(18) | 1.24(2)  | N(13) | C(19) | 1.34(2)   |
| N(13) | C(23) | 1.16(1)  | N(14) | C(20) | 1.30(1)   |
| N(14) | C(23) | 1.39(1)  | N(14) | H(16) | 0.99      |
| N(15) | C(21) | 1.30(2)  | N(15) | C(24) | 1.36(2)   |
| N(16) | C(22) | 1.40(2)  | N(16) | C(24) | 1.32(1)   |

Table 3. Bond Lengths( $\text{\AA}$ ) (continued)

| atom  | atom  | distance | atom  | atom  | distance |
|-------|-------|----------|-------|-------|----------|
| N(17) | C(25) | 1.50(1)  | N(17) | C(29) | 1.37(1)  |
| N(18) | C(26) | 1.31(2)  | N(18) | C(29) | 1.34(2)  |
| N(18) | H(21) | 0.97     | N(19) | C(27) | 1.33(2)  |
| N(19) | C(30) | 1.42(1)  | N(20) | C(28) | 1.34(2)  |
| N(20) | C(30) | 1.30(2)  | N(21) | C(31) | 1.44(2)  |
| N(21) | C(35) | 1.37(2)  | N(22) | C(32) | 1.31(2)  |
| N(22) | C(35) | 1.36(1)  | N(22) | H(26) | 0.95     |
| N(23) | C(33) | 1.13(1)  | N(23) | C(36) | 1.42(1)  |
| N(24) | C(34) | 1.41(1)  | N(24) | C(36) | 1.43(1)  |
| C(1)  | C(2)  | 1.26(2)  | C(1)  | H(2)  | 0.97     |
| C(2)  | H(3)  | 1.08     | C(3)  | C(4)  | 1.41(2)  |
| C(3)  | H(4)  | 1.10     | C(4)  | H(5)  | 1.04     |
| C(5)  | C(6)  | 1.44(2)  | C(7)  | C(8)  | 1.22(2)  |
| C(7)  | H(7)  | 1.00     | C(8)  | H(8)  | 0.93     |
| C(9)  | C(10) | 1.38(2)  | C(9)  | H(9)  | 0.93     |
| C(10) | H(10) | 0.99     | C(11) | C(12) | 1.38(1)  |
| C(13) | C(14) | 1.41(2)  | C(13) | H(12) | 1.00     |
| C(14) | H(13) | 0.98     | C(15) | C(16) | 1.33(2)  |
| C(15) | H(14) | 1.01     | C(16) | H(15) | 0.93     |
| C(17) | C(18) | 1.56(2)  | C(19) | C(20) | 1.50(2)  |
| C(19) | H(17) | 1.00     | C(20) | H(18) | 1.06     |
| C(21) | C(22) | 1.33(2)  | C(21) | H(19) | 1.07     |
| C(22) | H(20) | 0.97     | C(23) | C(24) | 1.50(2)  |
| C(25) | C(26) | 1.46(2)  | C(25) | H(22) | 0.99     |

Table 3. Bond Lengths( $\text{\AA}$ ) (continued)

| atom  | atom  | distance | atom  | atom  | distance |
|-------|-------|----------|-------|-------|----------|
| C(26) | H(23) | 0.96     | C(27) | C(28) | 1.34(2)  |
| C(27) | H(24) | 0.95     | C(28) | H(25) | 0.95     |
| C(29) | C(30) | 1.43(2)  | C(31) | C(32) | 1.34(2)  |
| C(31) | H(27) | 0.95     | C(32) | H(28) | 1.03     |
| C(33) | C(34) | 1.43(2)  | C(33) | H(29) | 0.97     |
| C(34) | H(30) | 1.05     | C(35) | C(36) | 1.27(1)  |

Table 4. Bond Angles(°)

| atom  | atom  | atom  | angle    | atom  | atom  | atom  | angle     |
|-------|-------|-------|----------|-------|-------|-------|-----------|
| N(1)  | Ru(1) | N(3)  | 78.5(4)  | N(1)  | Ru(1) | N(5)  | 97.2(4)   |
| N(1)  | Ru(1) | N(7)  | 89.4(4)  | N(1)  | Ru(1) | N(9)  | 168.6(4)  |
| N(1)  | Ru(1) | N(11) | 90.6(4)  | N(3)  | Ru(1) | N(5)  | 173.2(3)  |
| N(3)  | Ru(1) | N(7)  | 95.0(3)  | N(3)  | Ru(1) | N(9)  | 99.9(3)   |
| N(3)  | Ru(1) | N(11) | 90.4(3)  | N(5)  | Ru(1) | N(7)  | 79.7(3)   |
| N(5)  | Ru(1) | N(9)  | 85.4(3)  | N(5)  | Ru(1) | N(11) | 94.9(3)   |
| N(7)  | Ru(1) | N(9)  | 102.0(4) | N(7)  | Ru(1) | N(11) | 174.5(4)  |
| N(9)  | Ru(1) | N(11) | 78.1(3)  | N(13) | Ru(2) | N(15) | 75.5(4)   |
| N(13) | Ru(2) | N(17) | 100.3(3) | N(13) | Ru(2) | N(19) | 169.9(4)  |
| N(13) | Ru(2) | N(21) | 84.0(4)  | N(13) | Ru(2) | N(23) | 97.2(4)   |
| N(15) | Ru(2) | N(17) | 83.2(3)  | N(15) | Ru(2) | N(19) | 94.4(4)   |
| N(15) | Ru(2) | N(21) | 104.1(4) | N(15) | Ru(2) | N(23) | 171.0(3)  |
| N(17) | Ru(2) | N(19) | 79.2(3)  | N(17) | Ru(2) | N(21) | 172.3(3)  |
| N(17) | Ru(2) | N(23) | 93.1(3)  | N(19) | Ru(2) | N(21) | 97.7(4)   |
| N(19) | Ru(2) | N(23) | 92.9(4)  | N(21) | Ru(2) | N(23) | 79.9(4)   |
| Ru(1) | N(1)  | C(1)  | 142.1(9) | Ru(1) | N(1)  | C(5)  | 110.6(8)  |
| C(1)  | N(1)  | C(5)  | 105(1)   | C(2)  | N(2)  | C(5)  | 102(1)    |
| C(2)  | N(2)  | H(1)  | 125.7    | C(5)  | N(2)  | H(1)  | 130.7     |
| Ru(1) | N(3)  | C(3)  | 136.1(8) | Ru(1) | N(3)  | C(6)  | 114.4(7)  |
| C(3)  | N(3)  | C(6)  | 108.1(9) | C(4)  | N(4)  | C(6)  | 106.1(10) |
| Ru(1) | N(5)  | C(7)  | 143.2(7) | Ru(1) | N(5)  | C(11) | 113.4(6)  |
| C(7)  | N(5)  | C(11) | 102.3(8) | C(8)  | N(6)  | C(11) | 107.0(10) |
| C(8)  | N(6)  | H(6)  | 124.9    | C(11) | N(6)  | H(6)  | 127.9     |
| Ru(1) | N(7)  | C(9)  | 137.1(9) | Ru(1) | N(7)  | C(12) | 115.6(7)  |

Table 4. Bond Angles(°) (continued)

| atom  | atom  | atom  | angle     | atom  | atom  | atom  | angle    |
|-------|-------|-------|-----------|-------|-------|-------|----------|
| C(9)  | N(7)  | C(12) | 103.3(9)  | C(10) | N(8)  | C(12) | 103(1)   |
| Ru(1) | N(9)  | C(13) | 140.4(7)  | Ru(1) | N(9)  | C(17) | 113.4(7) |
| C(13) | N(9)  | C(17) | 106.1(9)  | C(14) | N(10) | C(17) | 102.5(9) |
| C(14) | N(10) | H(11) | 128.2     | C(17) | N(10) | H(11) | 129.2    |
| Ru(1) | N(11) | C(15) | 141.8(6)  | Ru(1) | N(11) | C(18) | 126.0(8) |
| C(15) | N(11) | C(18) | 92.2(8)   | C(16) | N(12) | C(18) | 102(1)   |
| Ru(2) | N(13) | C(19) | 131.5(8)  | Ru(2) | N(13) | C(23) | 117.0(8) |
| C(19) | N(13) | C(23) | 111(1)    | C(20) | N(14) | C(23) | 102.5(9) |
| C(20) | N(14) | H(16) | 132.2     | C(23) | N(14) | H(16) | 125.2    |
| Ru(2) | N(15) | C(21) | 136.6(8)  | Ru(2) | N(15) | C(24) | 114.0(7) |
| C(21) | N(15) | C(24) | 107.9(9)  | C(22) | N(16) | C(24) | 104.7(9) |
| Ru(2) | N(17) | C(25) | 134.4(6)  | Ru(2) | N(17) | C(29) | 117.0(7) |
| C(25) | N(17) | C(29) | 104.7(8)  | C(26) | N(18) | C(29) | 109.7(9) |
| C(26) | N(18) | H(21) | 128.7     | C(29) | N(18) | H(21) | 121.2    |
| Ru(2) | N(19) | C(27) | 142.5(8)  | Ru(2) | N(19) | C(30) | 116.1(7) |
| C(27) | N(19) | C(30) | 101.1(9)  | C(28) | N(20) | C(30) | 102.8(9) |
| Ru(2) | N(21) | C(31) | 141.8(9)  | Ru(2) | N(21) | C(35) | 112.0(7) |
| C(31) | N(21) | C(35) | 105.7(10) | C(32) | N(22) | C(35) | 112(1)   |
| C(32) | N(22) | H(26) | 125.6     | C(35) | N(22) | H(26) | 122.1    |
| Ru(2) | N(23) | C(33) | 134.1(7)  | Ru(2) | N(23) | C(36) | 105.4(5) |
| C(33) | N(23) | C(36) | 119.9(8)  | C(34) | N(24) | C(36) | 105.4(8) |
| N(1)  | C(1)  | C(2)  | 113(1)    | N(1)  | C(1)  | H(2)  | 123.8    |
| C(2)  | C(1)  | H(2)  | 122.7     | N(2)  | C(2)  | C(1)  | 106(1)   |
| N(2)  | C(2)  | H(3)  | 127.2     | C(1)  | C(2)  | H(3)  | 124.4    |

Table 4. Bond Angles(°) (continued)

| atom  | atom  | atom  | angle     | atom  | atom  | atom  | angle    |
|-------|-------|-------|-----------|-------|-------|-------|----------|
| N(3)  | C(3)  | C(4)  | 104(1)    | N(3)  | C(3)  | H(4)  | 125.3    |
| C(4)  | C(3)  | H(4)  | 129.7     | N(4)  | C(4)  | C(3)  | 107(1)   |
| N(4)  | C(4)  | H(5)  | 127.7     | C(3)  | C(4)  | H(5)  | 123.8    |
| N(1)  | C(5)  | N(2)  | 109.3(10) | N(1)  | C(5)  | C(6)  | 119(1)   |
| N(2)  | C(5)  | C(6)  | 130(1)    | N(3)  | C(6)  | N(4)  | 111.5(9) |
| N(3)  | C(6)  | C(5)  | 115.3(10) | N(4)  | C(6)  | C(5)  | 131(1)   |
| N(5)  | C(7)  | C(8)  | 113(1)    | N(5)  | C(7)  | H(7)  | 122.9    |
| C(8)  | C(7)  | H(7)  | 123.5     | N(6)  | C(8)  | C(7)  | 109(1)   |
| N(6)  | C(8)  | H(8)  | 122.8     | C(7)  | C(8)  | H(8)  | 127.4    |
| N(7)  | C(9)  | C(10) | 105(1)    | N(7)  | C(9)  | H(9)  | 125.9    |
| C(10) | C(9)  | H(9)  | 127.6     | N(8)  | C(10) | C(9)  | 110(1)   |
| N(8)  | C(10) | H(10) | 123.3     | C(9)  | C(10) | H(10) | 126.0    |
| N(5)  | C(11) | N(6)  | 107.6(8)  | N(5)  | C(11) | C(12) | 114.1(9) |
| N(6)  | C(11) | C(12) | 138(1)    | N(7)  | C(12) | N(8)  | 116(1)   |
| N(7)  | C(12) | C(11) | 116.3(10) | N(8)  | C(12) | C(11) | 126(1)   |
| N(9)  | C(13) | C(14) | 108(1)    | N(9)  | C(13) | H(12) | 122.6    |
| C(14) | C(13) | H(12) | 128.8     | N(10) | C(14) | C(13) | 107(1)   |
| N(10) | C(14) | H(13) | 124.6     | C(13) | C(14) | H(13) | 126.0    |
| N(11) | C(15) | C(16) | 106.8(9)  | N(11) | C(15) | H(14) | 126.2    |
| C(16) | C(15) | H(14) | 126.8     | N(12) | C(16) | C(15) | 111(1)   |
| N(12) | C(16) | H(15) | 119.8     | C(15) | C(16) | H(15) | 128.4    |
| N(9)  | C(17) | N(10) | 114.7(9)  | N(9)  | C(17) | C(18) | 115.8(9) |
| N(10) | C(17) | C(18) | 129.2(9)  | N(11) | C(18) | N(12) | 126(1)   |
| N(11) | C(18) | C(17) | 106(1)    | N(12) | C(18) | C(17) | 126(1)   |



Table 4. Bond Angles(°) (continued)

| atom  | atom  | atom  | angle     | atom  | atom  | atom  | angle     |
|-------|-------|-------|-----------|-------|-------|-------|-----------|
| N(13) | C(19) | C(20) | 101.3(10) | N(13) | C(19) | H(17) | 128.8     |
| C(20) | C(19) | H(17) | 129.8     | N(14) | C(20) | C(19) | 108.2(10) |
| N(14) | C(20) | H(18) | 122.9     | C(19) | C(20) | H(18) | 128.9     |
| N(15) | C(21) | C(22) | 109(1)    | N(15) | C(21) | H(19) | 129.7     |
| C(22) | C(21) | H(19) | 121.0     | N(16) | C(22) | C(21) | 108.2(10) |
| N(16) | C(22) | H(20) | 123.7     | C(21) | C(22) | H(20) | 126.6     |
| N(13) | C(23) | N(14) | 116.3(10) | N(13) | C(23) | C(24) | 120(1)    |
| N(14) | C(23) | C(24) | 123.1(10) | N(15) | C(24) | N(16) | 109.9(10) |
| N(15) | C(24) | C(23) | 112.2(10) | N(16) | C(24) | C(23) | 137(1)    |
| N(17) | C(25) | C(26) | 101.7(9)  | N(17) | C(25) | H(22) | 129.5     |
| C(26) | C(25) | H(22) | 128.8     | N(18) | C(26) | C(25) | 110.5(10) |
| N(18) | C(26) | H(23) | 121.9     | C(25) | C(26) | H(23) | 127.2     |
| N(19) | C(27) | C(28) | 109.5(10) | N(19) | C(27) | H(24) | 127.0     |
| C(28) | C(27) | H(24) | 123.6     | N(20) | C(28) | C(27) | 111.4(10) |
| N(20) | C(28) | H(25) | 120.4     | C(27) | C(28) | H(25) | 128.0     |
| N(17) | C(29) | N(18) | 111.5(9)  | N(17) | C(29) | C(30) | 113(1)    |
| N(18) | C(29) | C(30) | 134(1)    | N(19) | C(30) | N(20) | 113(1)    |
| N(19) | C(30) | C(29) | 112.7(10) | N(20) | C(30) | C(29) | 132(1)    |
| N(21) | C(31) | C(32) | 107(1)    | N(21) | C(31) | H(27) | 132.8     |
| C(32) | C(31) | H(27) | 119.4     | N(22) | C(32) | C(31) | 107(1)    |
| N(22) | C(32) | H(28) | 124.5     | C(31) | C(32) | H(28) | 125.8     |
| N(23) | C(33) | C(34) | 106.9(9)  | N(23) | C(33) | H(29) | 123.7     |
| C(34) | C(33) | H(29) | 129.3     | N(24) | C(34) | C(33) | 106.9(9)  |
| N(24) | C(34) | H(30) | 126.8     | C(33) | C(34) | H(30) | 126.0     |

Table 4. Bond Angles(°) (continued)

| atom  | atom  | atom  | angle     | atom  | atom  | atom  | angle    |
|-------|-------|-------|-----------|-------|-------|-------|----------|
| N(21) | C(35) | N(22) | 106.6(10) | N(21) | C(35) | C(36) | 118(1)   |
| N(22) | C(35) | C(36) | 135(1)    | N(23) | C(36) | N(24) | 100.3(7) |
| N(23) | C(36) | C(35) | 124.0(8)  | N(24) | C(36) | C(35) | 135.7(9) |
