# Supplementary material
Source: PubMed Central journal article supplement (PMC122701)
Supplement: pnas_072661699_4.pdf [file pnas_072661699_4.pdf]

## EXPERIMENTAL DETAILS

### A. Crystal Data

|                                                                        |                                                                                                                          |
|------------------------------------------------------------------------|--------------------------------------------------------------------------------------------------------------------------|
| Empirical Formula                                                      | $\text{Co}_2\text{C}_{45}\text{H}_{58}\text{N}_{24}\text{O}_5$                                                           |
| Formula Weight                                                         | 1132.98                                                                                                                  |
| Crystal Color, Habit                                                   | red, prismatic                                                                                                           |
| Crystal Dimensions                                                     | 0.24 X 0.18 X 0.21 mm                                                                                                    |
| Crystal System                                                         | orthorhombic                                                                                                             |
| Lattice Type                                                           | Primitive                                                                                                                |
| No. of Reflections Used for Unit Cell Determination ( $2\theta$ range) | 25 ( 57.1 - 59.3° )                                                                                                      |
| Omega Scan Peak Width at Half-height                                   | 0.30°                                                                                                                    |
| Lattice Parameters                                                     | $a = 13.917(4) \text{ \AA}$<br>$b = 31.216(8) \text{ \AA}$<br>$c = 12.721(5) \text{ \AA}$<br>$V = 5526(2) \text{ \AA}^3$ |
| Space Group                                                            | $P2_12_12_1$ (#19)                                                                                                       |
| Z value                                                                | 4                                                                                                                        |
| $D_{calc}$                                                             | 1.362 g/cm <sup>3</sup>                                                                                                  |
| $F_{000}$                                                              | 2360.00                                                                                                                  |
| $\mu(\text{CuK}\alpha)$                                                | 52.54 cm <sup>-1</sup>                                                                                                   |

### B. Intensity Measurements

|                |                                                                                  |
|----------------|----------------------------------------------------------------------------------|
| Diffractometer | Rigaku AFC7R (rotating anode)                                                    |
| Radiation      | $\text{CuK}\alpha$ ( $\lambda = 1.54178 \text{ \AA}$ )<br>graphite monochromated |
| Attenuator     | Ni foil (factor = 9.30)                                                          |

|                              |                                                                                                                                                         |
|------------------------------|---------------------------------------------------------------------------------------------------------------------------------------------------------|
| Temperature                  | -123.0 °C                                                                                                                                               |
| Collimator Size              | 1.0 mm                                                                                                                                                  |
| Take-off Angle               | 6.0°                                                                                                                                                    |
| Detector Aperture            | 9.0 mm horizontal<br>13.0 mm vertical                                                                                                                   |
| Crystal to Detector Distance | 235 mm                                                                                                                                                  |
| Scan Type                    | $\omega$ - $2\theta$                                                                                                                                    |
| Scan Rate                    | 8.0°/min (in $\omega$ ) (up to 5 scans)                                                                                                                 |
| Scan Width                   | $(0.73 + 0.30 \tan \theta)^\circ$                                                                                                                       |
| $2\theta_{max}$              | 120.2°                                                                                                                                                  |
| No. of Reflections Measured  | Total: 4530<br>Unique: 4528 ( $R_{int} = 0.034$ )                                                                                                       |
| Corrections                  | Lorentz-polarization<br>Absorption<br>(trans. factors: 0.6697 - 0.9979)<br>Decay (1.92% increase)<br>Secondary Extinction<br>(coefficient: 1.79293e-06) |

### C. Structure Solution and Refinement

|                                                                        |                                                                              |
|------------------------------------------------------------------------|------------------------------------------------------------------------------|
| Structure Solution                                                     | Direct Methods (SIR92)                                                       |
| Refinement                                                             | Full-matrix least-squares                                                    |
| Function Minimized                                                     | $\Sigma w( F_o  -  F_c )^2$                                                  |
| Least Squares Weights                                                  | $w = \frac{1}{\sigma^2(F_o)} = [\sigma_c^2(F_o) + \frac{v^2}{4} F_o^2]^{-1}$ |
| p-factor                                                               | 0.0500                                                                       |
| Anomalous Dispersion                                                   | All non-hydrogen atoms                                                       |
| No. of Observations ( $I > 3.00\sigma(I)$ , $2\theta < 120.19^\circ$ ) | 2913                                                                         |
| No. Variables                                                          | 686                                                                          |
| Reflection/Parameter Ratio                                             | 4.25                                                                         |
| Residuals: R; Rw                                                       | 0.044 ; 0.051                                                                |

|                                 |                            |
|---------------------------------|----------------------------|
| Residuals: R1                   | 0.044                      |
| No. of Reflections to calc R1   | 2913                       |
| Goodness of Fit Indicator       | 1.25                       |
| Max Shift/Error in Final Cycle  | 0.034                      |
| Maximum peak in Final Diff. Map | $0.38 e^{-}/\text{\AA}^3$  |
| Minimum peak in Final Diff. Map | $-0.31 e^{-}/\text{\AA}^3$ |

Table 1. Atomic coordinates and  $B_{iso}/B_{eq}$ 

| atom  | x           | y           | z          | $B_{eq}$ |
|-------|-------------|-------------|------------|----------|
| Co(1) | 0.15568(9)  | -0.44457(4) | 0.1145(1)  | 2.18(3)  |
| Co(2) | 0.09998(10) | 0.18939(4)  | 0.0026(1)  | 2.59(3)  |
| O(1)  | 0.7359(4)   | 0.4089(2)   | 0.3763(5)  | 3.5(1)   |
| O(2)  | 0.4052(5)   | 0.1711(3)   | 0.3953(6)  | 6.8(2)   |
| O(3)  | 0.3409(5)   | 0.0792(2)   | 0.2375(6)  | 5.2(2)   |
| O(4)  | 0.2329(5)   | 0.1619(2)   | 0.4851(5)  | 4.2(2)   |
| O(5)  | 0.3108(4)   | 0.0518(2)   | 0.4434(5)  | 4.5(2)   |
| N(1)  | 0.1771(5)   | -0.3849(2)  | 0.0864(5)  | 2.3(1)   |
| N(2)  | 0.2427(5)   | -0.3232(2)  | 0.1416(6)  | 2.8(2)   |
| N(3)  | 0.2130(5)   | -0.4300(2)  | 0.2493(5)  | 2.0(2)   |
| N(4)  | 0.2771(5)   | -0.3816(2)  | 0.3527(5)  | 2.4(2)   |
| N(5)  | 0.2800(4)   | -0.4576(2)  | 0.0552(5)  | 2.1(1)   |
| N(6)  | 0.4014(5)   | -0.5016(2)  | 0.0474(6)  | 2.6(2)   |
| N(7)  | 0.1579(5)   | -0.5046(2)  | 0.1492(5)  | 2.5(2)   |
| N(8)  | 0.2464(5)   | -0.5650(2)  | 0.1641(5)  | 2.7(2)   |
| N(9)  | 0.0284(5)   | -0.4372(2)  | 0.1698(6)  | 2.4(2)   |
| N(10) | -0.1266(4)  | -0.4372(2)  | 0.1447(6)  | 2.6(2)   |
| N(11) | 0.0873(5)   | -0.4510(2)  | -0.0151(5) | 2.4(2)   |
| N(12) | -0.0535(5)  | -0.4422(2)  | -0.1006(6) | 3.3(2)   |
| N(13) | 0.1073(5)   | 0.1287(2)   | -0.0206(5) | 2.5(2)   |
| N(14) | 0.0300(5)   | 0.0675(2)   | -0.0588(5) | 2.2(2)   |
| N(15) | -0.0290(5)  | 0.1817(2)   | -0.0471(6) | 2.7(2)   |
| N(16) | -0.1394(5)  | 0.1369(2)   | -0.1076(6) | 2.9(2)   |
| N(17) | 0.1452(5)   | 0.2035(2)   | -0.1364(5) | 2.8(2)   |

Table 1. Atomic coordinates and  $B_{iso}/B_{eq}$  (continued)

| atom  | x          | y          | z          | $B_{eq}$ |
|-------|------------|------------|------------|----------|
| N(18) | 0.1954(5)  | 0.2532(2)  | -0.2472(5) | 2.8(2)   |
| N(19) | 0.0915(5)  | 0.2506(2)  | 0.0166(6)  | 2.2(2)   |
| N(20) | 0.1256(5)  | 0.3144(2)  | -0.0542(6) | 2.5(2)   |
| N(21) | 0.0667(5)  | 0.1812(2)  | 0.1480(6)  | 2.6(2)   |
| N(22) | 0.1117(5)  | 0.1733(2)  | 0.3128(6)  | 3.1(2)   |
| N(23) | 0.2274(5)  | 0.1878(2)  | 0.0567(5)  | 2.4(2)   |
| N(24) | 0.3236(5)  | 0.1736(2)  | 0.1960(6)  | 3.2(2)   |
| C(1)  | 0.1701(6)  | -0.3559(3) | 0.0078(7)  | 2.6(2)   |
| C(2)  | 0.2102(7)  | -0.3188(3) | 0.0407(7)  | 3.2(2)   |
| C(3)  | 0.2325(6)  | -0.4501(3) | 0.3423(7)  | 2.5(2)   |
| C(4)  | 0.2738(7)  | -0.4202(3) | 0.4073(7)  | 2.9(2)   |
| C(5)  | 0.2217(6)  | -0.3636(3) | 0.1662(7)  | 2.5(2)   |
| C(6)  | 0.2394(6)  | -0.3892(3) | 0.2566(7)  | 2.3(2)   |
| C(7)  | 0.3539(6)  | -0.4379(3) | 0.0041(7)  | 2.8(2)   |
| C(8)  | 0.4288(6)  | -0.4647(3) | -0.0010(8) | 2.7(2)   |
| C(9)  | 0.1017(6)  | -0.5351(3) | 0.1970(7)  | 2.7(2)   |
| C(10) | 0.1565(7)  | -0.5715(3) | 0.2049(7)  | 2.6(2)   |
| C(11) | 0.3116(6)  | -0.4969(2) | 0.0803(6)  | 2.1(2)   |
| C(12) | 0.2423(5)  | -0.5243(3) | 0.1334(6)  | 2.1(2)   |
| C(13) | -0.0165(7) | -0.4327(3) | 0.2664(7)  | 2.6(2)   |
| C(14) | -0.1119(7) | -0.4328(3) | 0.2513(7)  | 2.8(2)   |
| C(15) | 0.1045(6)  | -0.4516(3) | -0.1212(7) | 2.5(2)   |
| C(16) | 0.0195(7)  | -0.4469(3) | -0.1712(7) | 3.4(2)   |
| C(17) | -0.0407(6) | -0.4400(3) | 0.0990(7)  | 2.3(2)   |

Table 1. Atomic coordinates and  $B_{iso}/B_{eq}$  (continued)

| atom  | x          | y          | z          | $B_{eq}$ |
|-------|------------|------------|------------|----------|
| C(18) | -0.0089(6) | -0.4446(3) | -0.0074(7) | 2.6(2)   |
| C(19) | 0.1717(6)  | 0.0961(3)  | -0.0083(7) | 2.9(2)   |
| C(20) | 0.1231(6)  | 0.0588(3)  | -0.0321(6) | 2.6(2)   |
| C(21) | -0.1077(6) | 0.2051(3)  | -0.0737(7) | 3.3(2)   |
| C(22) | -0.1771(6) | 0.1781(3)  | -0.1126(9) | 3.6(2)   |
| C(23) | 0.0246(6)  | 0.1099(3)  | -0.0493(7) | 2.5(2)   |
| C(24) | -0.0500(6) | 0.1402(3)  | -0.0693(7) | 2.6(2)   |
| C(25) | 0.1739(7)  | 0.1833(3)  | -0.2267(8) | 3.8(2)   |
| C(26) | 0.2054(7)  | 0.2134(3)  | -0.2949(7) | 3.2(2)   |
| C(27) | 0.0642(6)  | 0.2815(3)  | 0.0867(7)  | 2.6(2)   |
| C(28) | 0.0861(6)  | 0.3206(3)  | 0.0429(7)  | 2.6(2)   |
| C(29) | 0.1583(6)  | 0.2450(3)  | -0.1513(7) | 2.5(2)   |
| C(30) | 0.1274(6)  | 0.2729(3)  | -0.0665(6) | 2.2(2)   |
| C(31) | -0.0133(6) | 0.1799(3)  | 0.2095(8)  | 3.1(2)   |
| C(32) | 0.0141(6)  | 0.1750(3)  | 0.3106(8)  | 3.1(2)   |
| C(33) | 0.3200(6)  | 0.1864(3)  | 0.0228(7)  | 2.8(2)   |
| C(34) | 0.3765(6)  | 0.1784(3)  | 0.1059(8)  | 3.4(2)   |
| C(35) | 0.1409(7)  | 0.1772(3)  | 0.2111(7)  | 2.7(2)   |
| C(36) | 0.2344(6)  | 0.1797(3)  | 0.1610(7)  | 2.5(2)   |
| C(37) | 0.7819(7)  | 0.4200(3)  | 0.2790(8)  | 3.6(2)   |
| C(38) | 0.7970(8)  | 0.4667(3)  | 0.2703(10) | 5.4(3)   |
| C(39) | 0.8742(8)  | 0.3950(3)  | 0.2738(9)  | 5.1(3)   |
| C(40) | 0.4865(10) | 0.1971(6)  | 0.411(1)   | 8.7(5)   |
| C(41) | 0.513(1)   | 0.1949(10) | 0.522(1)   | 19.5(9)  |

Table 1. Atomic coordinates and  $B_{iso}/B_{eq}$  (continued)

| atom  | x         | y         | z          | $B_{eq}$ |
|-------|-----------|-----------|------------|----------|
| C(42) | 0.464(1)  | 0.2417(6) | 0.372(2)   | 12.4(7)  |
| C(43) | 0.4255(7) | 0.0570(4) | 0.2012(10) | 4.9(3)   |
| C(44) | 0.5119(8) | 0.0787(4) | 0.241(1)   | 6.1(3)   |
| C(45) | 0.4279(9) | 0.0550(4) | 0.084(1)   | 6.3(3)   |
| H(1)  | 0.1418    | -0.3608   | -0.0589    | 3.2      |
| H(2)  | 0.2146    | -0.2939   | -0.0009    | 4.1      |
| H(3)  | 0.2201    | -0.4790   | 0.3593     | 3.0      |
| H(4)  | 0.2961    | -0.4250   | 0.4763     | 3.6      |
| H(5)  | 0.2730    | -0.3026   | 0.1843     | 3.4      |
| H(6)  | 0.3516    | -0.4095   | -0.0238    | 3.4      |
| H(7)  | 0.4897    | -0.4589   | -0.0324    | 3.2      |
| H(8)  | 0.0372    | -0.5319   | 0.2198     | 3.2      |
| H(9)  | 0.1346    | -0.5976   | 0.2356     | 3.1      |
| H(10) | 0.4401    | -0.5265   | 0.0559     | 3.2      |
| H(11) | 0.0148    | -0.4303   | 0.3326     | 3.2      |
| H(12) | -0.1600   | -0.4302   | 0.3047     | 3.4      |
| H(13) | 0.1656    | -0.4547   | -0.1533    | 3.0      |
| H(14) | 0.0120    | -0.4467   | -0.2456    | 4.1      |
| H(15) | -0.1870   | -0.4379   | 0.1099     | 3.3      |
| H(16) | 0.2372    | 0.0986    | 0.0131     | 3.4      |
| H(17) | 0.1505    | 0.0310    | -0.0303    | 3.2      |
| H(18) | -0.1122   | 0.2346    | -0.0662    | 4.3      |
| H(19) | -0.2387   | 0.1861    | -0.1369    | 4.5      |
| H(20) | -0.1706   | 0.1104    | -0.1289    | 3.5      |

Table 1. Atomic coordinates and  $B_{iso}/B_{eq}$  (continued)

| atom  | x       | y      | z       | $B_{eq}$ |
|-------|---------|--------|---------|----------|
| H(21) | 0.1708  | 0.1534 | -0.2395 | 4.5      |
| H(22) | 0.2307  | 0.2080 | -0.3633 | 3.9      |
| H(23) | 0.0357  | 0.2772 | 0.1537  | 3.1      |
| H(24) | 0.0760  | 0.3478 | 0.0751  | 3.0      |
| H(25) | 0.1475  | 0.3363 | -0.1031 | 3.0      |
| H(26) | -0.0778 | 0.1820 | 0.1859  | 3.7      |
| H(27) | -0.0276 | 0.1730 | 0.3701  | 3.7      |
| H(28) | 0.3411  | 0.1903 | -0.0479 | 3.4      |
| H(29) | 0.4441  | 0.1757 | 0.1038  | 4.1      |
| H(30) | 0.1516  | 0.1702 | 0.3731  | 3.7      |
| H(31) | 0.7423  | 0.4109 | 0.2227  | 4.4      |
| H(32) | 0.8279  | 0.4726 | 0.2046  | 6.6      |
| H(33) | 0.8369  | 0.4761 | 0.3258  | 6.6      |
| H(34) | 0.7372  | 0.4808 | 0.2725  | 6.6      |
| H(35) | 0.8612  | 0.3654 | 0.2766  | 6.1      |
| H(36) | 0.9071  | 0.4017 | 0.2102  | 6.1      |
| H(37) | 0.9142  | 0.4028 | 0.3319  | 6.1      |
| H(38) | 0.6667  | 0.4151 | 0.4025  | 4.5      |
| H(39) | 0.5371  | 0.1839 | 0.3712  | 10.8     |
| H(40) | 0.5735  | 0.2076 | 0.5309  | 25.2     |
| H(41) | 0.4662  | 0.2060 | 0.5636  | 25.2     |
| H(42) | 0.5214  | 0.1638 | 0.5412  | 25.2     |
| H(43) | 0.4466  | 0.2391 | 0.3020  | 15.9     |
| H(44) | 0.5213  | 0.2573 | 0.3806  | 15.9     |



Table 1. Atomic coordinates and  $B_{iso}/B_{eq}$  (continued)

| atom  | x      | y      | z      | $B_{eq}$ |
|-------|--------|--------|--------|----------|
| H(45) | 0.4148 | 0.2522 | 0.4144 | 15.9     |
| H(46) | 0.3679 | 0.1458 | 0.3537 | 4.5      |
| H(47) | 0.4240 | 0.0286 | 0.2283 | 5.9      |
| H(48) | 0.5091 | 0.0813 | 0.3157 | 7.3      |
| H(49) | 0.5678 | 0.0635 | 0.2218 | 7.3      |
| H(50) | 0.5157 | 0.1072 | 0.2118 | 7.3      |
| H(51) | 0.4819 | 0.0389 | 0.0615 | 7.7      |
| H(52) | 0.3706 | 0.0417 | 0.0582 | 7.7      |
| H(53) | 0.4317 | 0.0832 | 0.0556 | 7.7      |
| H(54) | 0.3395 | 0.1049 | 0.2053 | 4.5      |

$$B_{eq} = \frac{8}{3}\pi^2(U_{11}(aa^*)^2 + U_{22}(bb^*)^2 + U_{33}(cc^*)^2 + 2U_{12}aa^*bb^* \cos \gamma + 2U_{13}aa^*cc^* \cos \beta + 2U_{23}bb^*cc^* \cos \alpha)$$

Table 2. Anisotropic Displacement Parameters

| atom  | $U_{11}$  | $U_{22}$  | $U_{33}$  | $U_{12}$   | $U_{13}$   | $U_{23}$   |
|-------|-----------|-----------|-----------|------------|------------|------------|
| Co(1) | 0.0284(7) | 0.0328(7) | 0.0215(7) | 0.0009(7)  | -0.0004(7) | -0.0020(7) |
| Co(2) | 0.0322(7) | 0.0328(7) | 0.0336(8) | -0.0016(7) | 0.0032(8)  | 0.0019(8)  |
| O(1)  | 0.036(3)  | 0.057(4)  | 0.039(4)  | 0.002(3)   | 0.013(3)   | 0.002(4)   |
| O(2)  | 0.053(5)  | 0.145(8)  | 0.060(5)  | -0.016(5)  | -0.006(5)  | 0.000(6)   |
| O(3)  | 0.032(4)  | 0.066(5)  | 0.098(6)  | 0.005(4)   | 0.002(4)   | 0.013(5)   |
| O(4)  | 0.062(4)  | 0.069(4)  | 0.026(4)  | -0.002(4)  | -0.005(4)  | -0.003(4)  |
| O(5)  | 0.038(4)  | 0.072(5)  | 0.059(5)  | 0.006(4)   | -0.006(4)  | 0.003(4)   |
| N(1)  | 0.028(4)  | 0.040(4)  | 0.019(4)  | 0.004(3)   | 0.001(3)   | -0.002(3)  |
| N(2)  | 0.037(4)  | 0.036(4)  | 0.034(5)  | -0.006(4)  | -0.005(4)  | -0.002(4)  |
| N(3)  | 0.033(4)  | 0.027(4)  | 0.018(4)  | -0.001(3)  | -0.001(3)  | -0.001(3)  |
| N(4)  | 0.035(4)  | 0.039(4)  | 0.019(4)  | -0.001(3)  | 0.001(3)   | -0.001(3)  |
| N(5)  | 0.020(3)  | 0.037(4)  | 0.023(4)  | -0.005(3)  | 0.001(3)   | -0.004(3)  |
| N(6)  | 0.029(4)  | 0.036(4)  | 0.034(4)  | 0.002(3)   | -0.005(4)  | 0.002(4)   |
| N(7)  | 0.030(4)  | 0.042(4)  | 0.021(4)  | -0.012(4)  | 0.004(3)   | -0.001(3)  |
| N(8)  | 0.043(5)  | 0.041(5)  | 0.018(4)  | 0.000(4)   | -0.001(4)  | -0.001(4)  |
| N(9)  | 0.032(4)  | 0.026(4)  | 0.034(4)  | 0.004(3)   | 0.006(4)   | 0.007(4)   |
| N(10) | 0.013(3)  | 0.043(4)  | 0.044(5)  | 0.003(3)   | 0.000(3)   | 0.002(4)   |
| N(11) | 0.035(4)  | 0.035(4)  | 0.021(4)  | 0.001(3)   | -0.001(4)  | -0.005(3)  |
| N(12) | 0.040(4)  | 0.045(4)  | 0.039(5)  | 0.005(4)   | 0.002(4)   | -0.002(4)  |
| N(13) | 0.027(4)  | 0.035(4)  | 0.033(5)  | -0.007(3)  | -0.001(4)  | 0.003(4)   |
| N(14) | 0.031(4)  | 0.030(4)  | 0.024(4)  | -0.001(3)  | 0.000(3)   | -0.003(3)  |
| N(15) | 0.030(4)  | 0.033(4)  | 0.039(5)  | 0.005(3)   | 0.007(4)   | 0.002(4)   |
| N(16) | 0.033(4)  | 0.033(4)  | 0.045(5)  | 0.000(3)   | -0.003(4)  | 0.008(4)   |
| N(17) | 0.041(4)  | 0.035(4)  | 0.030(5)  | -0.012(4)  | 0.003(4)   | -0.003(3)  |

Table 2. Anisotropic Displacement Parameters (continued)

| atom  | $U_{11}$ | $U_{22}$ | $U_{33}$ | $U_{12}$  | $U_{13}$  | $U_{23}$  |
|-------|----------|----------|----------|-----------|-----------|-----------|
| N(18) | 0.050(5) | 0.031(4) | 0.025(4) | 0.001(4)  | 0.002(4)  | -0.007(4) |
| N(19) | 0.029(4) | 0.034(3) | 0.022(4) | 0.002(3)  | 0.001(4)  | 0.002(3)  |
| N(20) | 0.035(4) | 0.027(4) | 0.034(4) | -0.003(3) | -0.002(4) | 0.007(4)  |
| N(21) | 0.029(4) | 0.030(4) | 0.040(5) | -0.004(3) | 0.000(4)  | -0.004(4) |
| N(22) | 0.046(5) | 0.038(4) | 0.035(5) | -0.004(4) | 0.003(4)  | 0.002(4)  |
| N(23) | 0.033(4) | 0.024(4) | 0.035(4) | -0.003(3) | 0.008(4)  | -0.003(4) |
| N(24) | 0.036(4) | 0.044(5) | 0.043(5) | 0.003(4)  | 0.006(4)  | 0.005(4)  |
| C(1)  | 0.028(4) | 0.040(5) | 0.032(5) | -0.001(4) | 0.001(5)  | 0.011(5)  |
| C(2)  | 0.051(6) | 0.042(6) | 0.030(5) | 0.003(5)  | -0.001(5) | 0.012(5)  |
| C(3)  | 0.030(5) | 0.039(5) | 0.025(5) | -0.009(4) | -0.004(4) | 0.008(4)  |
| C(4)  | 0.043(5) | 0.044(5) | 0.025(5) | -0.004(5) | -0.002(5) | 0.008(4)  |
| C(5)  | 0.026(4) | 0.037(5) | 0.030(5) | -0.003(4) | 0.001(4)  | -0.002(4) |
| C(6)  | 0.029(5) | 0.037(5) | 0.022(5) | 0.002(4)  | 0.009(4)  | 0.006(4)  |
| C(7)  | 0.030(4) | 0.043(5) | 0.034(5) | -0.004(4) | 0.002(5)  | 0.004(5)  |
| C(8)  | 0.026(4) | 0.042(5) | 0.034(5) | -0.003(4) | 0.007(5)  | 0.013(5)  |
| C(9)  | 0.025(4) | 0.049(5) | 0.027(5) | 0.001(4)  | 0.000(4)  | -0.001(4) |
| C(10) | 0.037(5) | 0.034(5) | 0.026(5) | -0.007(4) | 0.002(5)  | -0.003(4) |
| C(11) | 0.027(5) | 0.023(4) | 0.028(5) | 0.004(4)  | -0.007(4) | -0.008(4) |
| C(12) | 0.022(4) | 0.041(5) | 0.016(5) | -0.001(4) | -0.006(4) | 0.006(4)  |
| C(13) | 0.045(6) | 0.032(5) | 0.021(5) | 0.003(4)  | 0.005(4)  | -0.004(4) |
| C(14) | 0.043(6) | 0.039(5) | 0.023(5) | 0.010(4)  | 0.005(5)  | -0.004(4) |
| C(15) | 0.032(5) | 0.038(5) | 0.023(5) | 0.002(4)  | 0.007(5)  | -0.002(4) |
| C(16) | 0.052(6) | 0.047(6) | 0.031(5) | 0.002(5)  | -0.013(5) | -0.001(5) |
| C(17) | 0.030(5) | 0.029(5) | 0.030(5) | 0.002(4)  | 0.004(4)  | 0.001(4)  |

Table 2. Anisotropic Displacement Parameters (continued)

| atom  | U <sub>11</sub> | U <sub>22</sub> | U <sub>33</sub> | U <sub>12</sub> | U <sub>13</sub> | U <sub>23</sub> |
|-------|-----------------|-----------------|-----------------|-----------------|-----------------|-----------------|
| C(18) | 0.032(5)        | 0.040(5)        | 0.027(5)        | -0.006(4)       | 0.000(4)        | 0.001(5)        |
| C(19) | 0.041(5)        | 0.037(5)        | 0.034(5)        | 0.005(4)        | 0.005(5)        | 0.009(5)        |
| C(20) | 0.039(5)        | 0.034(5)        | 0.028(5)        | -0.001(4)       | 0.007(4)        | 0.007(4)        |
| C(21) | 0.031(5)        | 0.052(6)        | 0.042(6)        | 0.001(5)        | 0.004(5)        | 0.001(5)        |
| C(22) | 0.027(5)        | 0.046(5)        | 0.065(7)        | 0.003(4)        | 0.004(5)        | 0.004(6)        |
| C(23) | 0.032(5)        | 0.039(5)        | 0.023(5)        | 0.000(4)        | 0.001(4)        | 0.001(4)        |
| C(24) | 0.029(5)        | 0.045(5)        | 0.026(5)        | 0.002(4)        | 0.005(4)        | 0.002(4)        |
| C(25) | 0.056(7)        | 0.047(6)        | 0.040(6)        | 0.003(5)        | 0.016(5)        | -0.014(5)       |
| C(26) | 0.056(6)        | 0.043(5)        | 0.021(5)        | 0.001(5)        | 0.010(5)        | -0.004(5)       |
| C(27) | 0.021(4)        | 0.049(5)        | 0.029(5)        | 0.004(4)        | 0.006(4)        | -0.007(5)       |
| C(28) | 0.035(5)        | 0.032(5)        | 0.032(5)        | 0.005(4)        | 0.000(4)        | 0.002(4)        |
| C(29) | 0.032(5)        | 0.032(5)        | 0.031(5)        | -0.014(4)       | 0.006(5)        | -0.001(4)       |
| C(30) | 0.031(5)        | 0.031(5)        | 0.022(5)        | -0.001(4)       | 0.002(4)        | 0.002(4)        |
| C(31) | 0.026(5)        | 0.039(6)        | 0.053(7)        | -0.006(4)       | 0.009(5)        | -0.003(5)       |
| C(32) | 0.035(5)        | 0.043(6)        | 0.041(6)        | -0.007(5)       | 0.019(5)        | -0.007(5)       |
| C(33) | 0.026(5)        | 0.041(5)        | 0.038(6)        | -0.005(4)       | 0.004(4)        | -0.008(5)       |
| C(34) | 0.038(6)        | 0.043(5)        | 0.049(6)        | -0.008(4)       | 0.008(5)        | -0.003(5)       |
| C(35) | 0.039(5)        | 0.029(5)        | 0.033(5)        | -0.004(4)       | 0.007(5)        | 0.001(4)        |
| C(36) | 0.032(5)        | 0.036(5)        | 0.027(5)        | -0.002(4)       | 0.004(4)        | -0.003(4)       |
| C(37) | 0.039(6)        | 0.059(6)        | 0.039(6)        | -0.001(5)       | 0.015(5)        | -0.005(5)       |
| C(38) | 0.068(8)        | 0.050(6)        | 0.088(10)       | -0.001(6)       | 0.011(7)        | 0.020(7)        |
| C(39) | 0.058(7)        | 0.063(7)        | 0.073(8)        | 0.000(6)        | 0.022(6)        | -0.013(6)       |
| C(40) | 0.055(8)        | 0.18(2)         | 0.09(1)         | -0.02(1)        | 0.003(8)        | -0.06(1)        |
| C(41) | 0.09(1)         | 0.55(4)         | 0.09(1)         | -0.06(2)        | -0.05(1)        | -0.05(2)        |

Table 2. Anisotropic Displacement Parameters (continued)

| atom  | U <sub>11</sub> | U <sub>22</sub> | U <sub>33</sub> | U <sub>12</sub> | U <sub>13</sub> | U <sub>23</sub> |
|-------|-----------------|-----------------|-----------------|-----------------|-----------------|-----------------|
| C(42) | 0.13(1)         | 0.16(2)         | 0.18(2)         | -0.03(1)        | 0.05(2)         | -0.07(2)        |
| C(43) | 0.040(6)        | 0.064(7)        | 0.082(9)        | -0.003(6)       | 0.007(6)        | 0.005(7)        |
| C(44) | 0.042(7)        | 0.098(9)        | 0.09(1)         | 0.014(7)        | 0.015(7)        | 0.016(9)        |
| C(45) | 0.087(9)        | 0.065(7)        | 0.087(10)       | 0.012(7)        | -0.025(8)       | -0.016(8)       |

The general temperature factor expression:

$$\exp(-2\pi^2(a^*U_{11}h^2 + b^*U_{22}k^2 + c^*U_{33}l^2 + 2a^*b^*U_{12}hk + 2a^*c^*U_{13}hl + 2b^*c^*U_{23}kl))$$

Table 3. Bond Lengths( $\text{\AA}$ )

| atom  | atom  | distance  | atom  | atom  | distance  |
|-------|-------|-----------|-------|-------|-----------|
| Co(1) | N(1)  | 1.919(7)  | Co(1) | N(3)  | 1.945(7)  |
| Co(1) | N(5)  | 1.931(6)  | Co(1) | N(7)  | 1.925(7)  |
| Co(1) | N(9)  | 1.921(7)  | Co(1) | N(11) | 1.913(7)  |
| Co(2) | N(13) | 1.919(7)  | Co(2) | N(15) | 1.918(7)  |
| Co(2) | N(17) | 1.929(7)  | Co(2) | N(19) | 1.922(7)  |
| Co(2) | N(21) | 1.923(8)  | Co(2) | N(23) | 1.903(7)  |
| O(1)  | C(37) | 1.44(1)   | O(1)  | H(38) | 1.04      |
| O(2)  | C(40) | 1.41(1)   | O(2)  | H(46) | 1.08      |
| O(3)  | C(43) | 1.44(1)   | O(3)  | H(54) | 0.90      |
| N(1)  | C(1)  | 1.353(10) | N(1)  | C(5)  | 1.363(10) |
| N(2)  | C(2)  | 1.37(1)   | N(2)  | C(5)  | 1.334(10) |
| N(2)  | H(5)  | 0.94      | N(3)  | C(3)  | 1.367(10) |
| N(3)  | C(6)  | 1.330(10) | N(4)  | C(4)  | 1.390(10) |
| N(4)  | C(6)  | 1.35(1)   | N(5)  | C(7)  | 1.362(10) |
| N(5)  | C(11) | 1.344(9)  | N(6)  | C(8)  | 1.361(10) |
| N(6)  | C(11) | 1.326(10) | N(6)  | H(10) | 0.95      |
| N(7)  | C(9)  | 1.375(10) | N(7)  | C(12) | 1.341(10) |
| N(8)  | C(10) | 1.37(1)   | N(8)  | C(12) | 1.331(10) |
| N(9)  | C(13) | 1.38(1)   | N(9)  | C(17) | 1.32(1)   |
| N(10) | C(14) | 1.38(1)   | N(10) | C(17) | 1.332(10) |
| N(10) | H(15) | 0.95      | N(11) | C(15) | 1.37(1)   |
| N(11) | C(18) | 1.357(10) | N(12) | C(16) | 1.36(1)   |
| N(12) | C(18) | 1.34(1)   | N(13) | C(19) | 1.367(10) |
| N(13) | C(23) | 1.344(10) | N(14) | C(20) | 1.37(1)   |

Table 3. Bond Lengths( $\text{\AA}$ ) (continued)

| atom  | atom  | distance  | atom  | atom  | distance  |
|-------|-------|-----------|-------|-------|-----------|
| N(14) | C(23) | 1.330(10) | N(15) | C(21) | 1.36(1)   |
| N(15) | C(24) | 1.36(1)   | N(16) | C(22) | 1.39(1)   |
| N(16) | C(24) | 1.34(1)   | N(16) | H(20) | 0.97      |
| N(17) | C(25) | 1.37(1)   | N(17) | C(29) | 1.321(9)  |
| N(18) | C(26) | 1.39(1)   | N(18) | C(29) | 1.35(1)   |
| N(19) | C(27) | 1.37(1)   | N(19) | C(30) | 1.361(10) |
| N(20) | C(28) | 1.37(1)   | N(20) | C(30) | 1.304(10) |
| N(20) | H(25) | 0.97      | N(21) | C(31) | 1.36(1)   |
| N(21) | C(35) | 1.31(1)   | N(22) | C(32) | 1.36(1)   |
| N(22) | C(35) | 1.36(1)   | N(22) | H(30) | 0.95      |
| N(23) | C(33) | 1.360(10) | N(23) | C(36) | 1.35(1)   |
| N(24) | C(34) | 1.37(1)   | N(24) | C(36) | 1.33(1)   |
| C(1)  | C(2)  | 1.35(1)   | C(1)  | H(1)  | 0.95      |
| C(2)  | H(2)  | 0.94      | C(3)  | C(4)  | 1.37(1)   |
| C(3)  | H(3)  | 0.94      | C(4)  | H(4)  | 0.94      |
| C(5)  | C(6)  | 1.42(1)   | C(7)  | C(8)  | 1.34(1)   |
| C(7)  | H(6)  | 0.95      | C(8)  | H(7)  | 0.95      |
| C(9)  | C(10) | 1.37(1)   | C(9)  | H(8)  | 0.95      |
| C(10) | H(9)  | 0.95      | C(11) | C(12) | 1.45(1)   |
| C(13) | C(14) | 1.34(1)   | C(13) | H(11) | 0.95      |
| C(14) | H(12) | 0.96      | C(15) | C(16) | 1.35(1)   |
| C(15) | H(13) | 0.95      | C(16) | H(14) | 0.95      |
| C(17) | C(18) | 1.43(1)   | C(19) | C(20) | 1.38(1)   |
| C(19) | H(16) | 0.95      | C(20) | H(17) | 0.95      |

Table 3. Bond Lengths( $\text{\AA}$ ) (continued)

| atom  | atom  | distance | atom  | atom  | distance |
|-------|-------|----------|-------|-------|----------|
| C(21) | C(22) | 1.37(1)  | C(21) | H(18) | 0.93     |
| C(22) | H(19) | 0.95     | C(23) | C(24) | 1.43(1)  |
| C(25) | C(26) | 1.35(1)  | C(25) | H(21) | 0.95     |
| C(26) | H(22) | 0.95     | C(27) | C(28) | 1.37(1)  |
| C(27) | H(23) | 0.95     | C(28) | H(24) | 0.95     |
| C(29) | C(30) | 1.45(1)  | C(31) | C(32) | 1.35(1)  |
| C(31) | H(26) | 0.95     | C(32) | H(27) | 0.96     |
| C(33) | C(34) | 1.34(1)  | C(33) | H(28) | 0.95     |
| C(34) | H(29) | 0.94     | C(35) | C(36) | 1.45(1)  |
| C(37) | C(38) | 1.48(1)  | C(37) | C(39) | 1.50(1)  |
| C(37) | H(31) | 0.95     | C(38) | H(32) | 0.96     |
| C(38) | H(33) | 0.95     | C(38) | H(34) | 0.94     |
| C(39) | H(35) | 0.94     | C(39) | H(36) | 0.95     |
| C(39) | H(37) | 0.96     | C(40) | C(41) | 1.47(2)  |
| C(40) | C(42) | 1.51(2)  | C(40) | H(39) | 0.96     |
| C(41) | H(40) | 0.94     | C(41) | H(41) | 0.91     |
| C(41) | H(42) | 1.01     | C(42) | H(43) | 0.92     |
| C(42) | H(44) | 0.94     | C(42) | H(45) | 0.93     |
| C(43) | C(44) | 1.47(2)  | C(43) | C(45) | 1.50(2)  |
| C(43) | H(47) | 0.95     | C(44) | H(48) | 0.96     |
| C(44) | H(49) | 0.94     | C(44) | H(50) | 0.97     |
| C(45) | H(51) | 0.95     | C(45) | H(52) | 0.96     |
| C(45) | H(53) | 0.95     |       |       |          |



Table 4. Bond Angles(°)

| atom  | atom  | atom  | angle    | atom  | atom  | atom  | angle    |
|-------|-------|-------|----------|-------|-------|-------|----------|
| N(1)  | Co(1) | N(3)  | 82.8(3)  | N(1)  | Co(1) | N(5)  | 89.6(3)  |
| N(1)  | Co(1) | N(7)  | 169.9(3) | N(1)  | Co(1) | N(9)  | 95.4(3)  |
| N(1)  | Co(1) | N(11) | 91.0(3)  | N(3)  | Co(1) | N(5)  | 91.5(3)  |
| N(3)  | Co(1) | N(7)  | 91.1(3)  | N(3)  | Co(1) | N(9)  | 91.5(3)  |
| N(3)  | Co(1) | N(11) | 171.0(3) | N(5)  | Co(1) | N(7)  | 82.6(3)  |
| N(5)  | Co(1) | N(9)  | 174.5(3) | N(5)  | Co(1) | N(11) | 95.0(3)  |
| N(7)  | Co(1) | N(9)  | 92.7(3)  | N(7)  | Co(1) | N(11) | 96.0(3)  |
| N(9)  | Co(1) | N(11) | 82.5(3)  | N(13) | Co(2) | N(15) | 82.8(3)  |
| N(13) | Co(2) | N(17) | 93.9(3)  | N(13) | Co(2) | N(19) | 176.4(3) |
| N(13) | Co(2) | N(21) | 91.7(3)  | N(13) | Co(2) | N(23) | 88.9(3)  |
| N(15) | Co(2) | N(17) | 91.8(3)  | N(15) | Co(2) | N(19) | 95.6(3)  |
| N(15) | Co(2) | N(21) | 94.3(3)  | N(15) | Co(2) | N(23) | 171.1(3) |
| N(17) | Co(2) | N(19) | 83.0(3)  | N(17) | Co(2) | N(21) | 172.2(3) |
| N(17) | Co(2) | N(23) | 91.9(3)  | N(19) | Co(2) | N(21) | 91.6(3)  |
| N(19) | Co(2) | N(23) | 92.8(3)  | N(21) | Co(2) | N(23) | 82.7(3)  |
| C(37) | O(1)  | H(38) | 130.2    | C(40) | O(2)  | H(46) | 150.9    |
| C(43) | O(3)  | H(54) | 107.4    | Co(1) | N(1)  | C(1)  | 140.9(6) |
| Co(1) | N(1)  | C(5)  | 113.9(5) | C(1)  | N(1)  | C(5)  | 104.9(7) |
| C(2)  | N(2)  | C(5)  | 104.0(7) | C(2)  | N(2)  | H(5)  | 128.5    |
| C(5)  | N(2)  | H(5)  | 127.5    | Co(1) | N(3)  | C(3)  | 137.5(6) |
| Co(1) | N(3)  | C(6)  | 113.5(6) | C(3)  | N(3)  | C(6)  | 108.9(7) |
| C(4)  | N(4)  | C(6)  | 106.8(7) | Co(1) | N(5)  | C(7)  | 140.1(6) |
| Co(1) | N(5)  | C(11) | 113.1(5) | C(7)  | N(5)  | C(11) | 106.2(7) |
| C(8)  | N(6)  | C(11) | 108.3(7) | C(8)  | N(6)  | H(10) | 125.7    |

Table 4. Bond Angles(°) (continued)

| atom  | atom  | atom  | angle    | atom  | atom  | atom  | angle    |
|-------|-------|-------|----------|-------|-------|-------|----------|
| C(11) | N(6)  | H(10) | 126.0    | Co(1) | N(7)  | C(9)  | 140.1(6) |
| Co(1) | N(7)  | C(12) | 115.2(5) | C(9)  | N(7)  | C(12) | 104.3(7) |
| C(10) | N(8)  | C(12) | 102.3(7) | Co(1) | N(9)  | C(13) | 138.9(6) |
| Co(1) | N(9)  | C(17) | 114.4(6) | C(13) | N(9)  | C(17) | 106.5(7) |
| C(14) | N(10) | C(17) | 107.6(7) | C(14) | N(10) | H(15) | 126.3    |
| C(17) | N(10) | H(15) | 126.0    | Co(1) | N(11) | C(15) | 139.7(6) |
| Co(1) | N(11) | C(18) | 114.4(6) | C(15) | N(11) | C(18) | 104.2(7) |
| C(16) | N(12) | C(18) | 103.3(7) | Co(2) | N(13) | C(19) | 138.9(6) |
| Co(2) | N(13) | C(23) | 115.4(5) | C(19) | N(13) | C(23) | 105.4(7) |
| C(20) | N(14) | C(23) | 103.2(7) | Co(2) | N(15) | C(21) | 140.3(6) |
| Co(2) | N(15) | C(24) | 112.9(5) | C(21) | N(15) | C(24) | 106.7(7) |
| C(22) | N(16) | C(24) | 107.2(7) | C(22) | N(16) | H(20) | 127.3    |
| C(24) | N(16) | H(20) | 125.5    | Co(2) | N(17) | C(25) | 139.3(6) |
| Co(2) | N(17) | C(29) | 113.6(6) | C(25) | N(17) | C(29) | 107.0(7) |
| C(26) | N(18) | C(29) | 105.2(7) | Co(2) | N(19) | C(27) | 141.2(6) |
| Co(2) | N(19) | C(30) | 114.5(5) | C(27) | N(19) | C(30) | 104.2(6) |
| C(28) | N(20) | C(30) | 104.9(7) | C(28) | N(20) | H(25) | 127.2    |
| C(30) | N(20) | H(25) | 127.9    | Co(2) | N(21) | C(31) | 138.9(6) |
| Co(2) | N(21) | C(35) | 114.2(6) | C(31) | N(21) | C(35) | 106.8(8) |
| C(32) | N(22) | C(35) | 105.9(8) | C(32) | N(22) | H(30) | 127.1    |
| C(35) | N(22) | H(30) | 126.9    | Co(2) | N(23) | C(33) | 140.3(6) |
| Co(2) | N(23) | C(36) | 115.2(6) | C(33) | N(23) | C(36) | 103.7(7) |
| C(34) | N(24) | C(36) | 101.9(8) | N(1)  | C(1)  | C(2)  | 108.4(8) |
| N(1)  | C(1)  | H(1)  | 125.6    | C(2)  | C(1)  | H(1)  | 126.0    |

Table 4. Bond Angles(°) (continued)

| atom  | atom  | atom  | angle    | atom  | atom  | atom  | angle    |
|-------|-------|-------|----------|-------|-------|-------|----------|
| N(2)  | C(2)  | C(1)  | 110.0(8) | N(2)  | C(2)  | H(2)  | 125.9    |
| C(1)  | C(2)  | H(2)  | 124.1    | N(3)  | C(3)  | C(4)  | 107.0(7) |
| N(3)  | C(3)  | H(3)  | 126.9    | C(4)  | C(3)  | H(3)  | 126.1    |
| N(4)  | C(4)  | C(3)  | 107.6(7) | N(4)  | C(4)  | H(4)  | 126.2    |
| C(3)  | C(4)  | H(4)  | 126.2    | N(1)  | C(5)  | N(2)  | 112.8(8) |
| N(1)  | C(5)  | C(6)  | 114.1(7) | N(2)  | C(5)  | C(6)  | 133.1(8) |
| N(3)  | C(6)  | N(4)  | 109.7(7) | N(3)  | C(6)  | C(5)  | 115.7(8) |
| N(4)  | C(6)  | C(5)  | 134.6(8) | N(5)  | C(7)  | C(8)  | 109.2(7) |
| N(5)  | C(7)  | H(6)  | 124.8    | C(8)  | C(7)  | H(6)  | 126.0    |
| N(6)  | C(8)  | C(7)  | 106.8(7) | N(6)  | C(8)  | H(7)  | 126.8    |
| C(7)  | C(8)  | H(7)  | 126.4    | N(7)  | C(9)  | C(10) | 106.9(7) |
| N(7)  | C(9)  | H(8)  | 126.9    | C(10) | C(9)  | H(8)  | 126.2    |
| N(8)  | C(10) | C(9)  | 110.9(7) | N(8)  | C(10) | H(9)  | 125.0    |
| C(9)  | C(10) | H(9)  | 124.1    | N(5)  | C(11) | N(6)  | 109.5(7) |
| N(5)  | C(11) | C(12) | 115.5(7) | N(6)  | C(11) | C(12) | 135.0(7) |
| N(7)  | C(12) | N(8)  | 115.6(7) | N(7)  | C(12) | C(11) | 112.4(7) |
| N(8)  | C(12) | C(11) | 131.9(7) | N(9)  | C(13) | C(14) | 108.6(8) |
| N(9)  | C(13) | H(11) | 125.9    | C(14) | C(13) | H(11) | 125.5    |
| N(10) | C(14) | C(13) | 106.8(8) | N(10) | C(14) | H(12) | 127.0    |
| C(13) | C(14) | H(12) | 126.2    | N(11) | C(15) | C(16) | 108.0(8) |
| N(11) | C(15) | H(13) | 125.6    | C(16) | C(15) | H(13) | 126.4    |
| N(12) | C(16) | C(15) | 110.7(8) | N(12) | C(16) | H(14) | 124.8    |
| C(15) | C(16) | H(14) | 124.5    | N(9)  | C(17) | N(10) | 110.6(7) |
| N(9)  | C(17) | C(18) | 115.2(7) | N(10) | C(17) | C(18) | 134.2(8) |

Table 4. Bond Angles(°) (continued)

| atom  | atom  | atom  | angle    | atom  | atom  | atom  | angle    |
|-------|-------|-------|----------|-------|-------|-------|----------|
| N(11) | C(18) | N(12) | 113.7(8) | N(11) | C(18) | C(17) | 112.9(8) |
| N(12) | C(18) | C(17) | 133.4(8) | N(13) | C(19) | C(20) | 106.4(7) |
| N(13) | C(19) | H(16) | 126.6    | C(20) | C(19) | H(16) | 127.0    |
| N(14) | C(20) | C(19) | 110.6(8) | N(14) | C(20) | H(17) | 124.7    |
| C(19) | C(20) | H(17) | 124.7    | N(15) | C(21) | C(22) | 109.1(8) |
| N(15) | C(21) | H(18) | 124.2    | C(22) | C(21) | H(18) | 126.8    |
| N(16) | C(22) | C(21) | 106.6(8) | N(16) | C(22) | H(19) | 127.1    |
| C(21) | C(22) | H(19) | 126.3    | N(13) | C(23) | N(14) | 114.3(7) |
| N(13) | C(23) | C(24) | 112.4(7) | N(14) | C(23) | C(24) | 133.1(8) |
| N(15) | C(24) | N(16) | 110.4(7) | N(15) | C(24) | C(23) | 116.0(7) |
| N(16) | C(24) | C(23) | 133.6(8) | N(17) | C(25) | C(26) | 108.2(8) |
| N(17) | C(25) | H(21) | 125.8    | C(26) | C(25) | H(21) | 126.0    |
| N(18) | C(26) | C(25) | 107.9(8) | N(18) | C(26) | H(22) | 126.3    |
| C(25) | C(26) | H(22) | 125.8    | N(19) | C(27) | C(28) | 107.5(7) |
| N(19) | C(27) | H(23) | 126.9    | C(28) | C(27) | H(23) | 125.6    |
| N(20) | C(28) | C(27) | 109.2(7) | N(20) | C(28) | H(24) | 125.0    |
| C(27) | C(28) | H(24) | 125.8    | N(17) | C(29) | N(18) | 111.6(7) |
| N(17) | C(29) | C(30) | 116.2(7) | N(18) | C(29) | C(30) | 132.1(7) |
| N(19) | C(30) | N(20) | 114.1(7) | N(19) | C(30) | C(29) | 112.2(7) |
| N(20) | C(30) | C(29) | 133.7(8) | N(21) | C(31) | C(32) | 108.6(8) |
| N(21) | C(31) | H(26) | 126.1    | C(32) | C(31) | H(26) | 125.3    |
| N(22) | C(32) | C(31) | 107.9(8) | N(22) | C(32) | H(27) | 126.0    |
| C(31) | C(32) | H(27) | 126.1    | N(23) | C(33) | C(34) | 108.1(8) |
| N(23) | C(33) | H(28) | 125.9    | C(34) | C(33) | H(28) | 125.9    |

Table 4. Bond Angles(°) (continued)

| atom  | atom  | atom  | angle     | atom  | atom  | atom  | angle    |
|-------|-------|-------|-----------|-------|-------|-------|----------|
| N(24) | C(34) | C(33) | 111.4(8)  | N(24) | C(34) | H(29) | 123.3    |
| C(33) | C(34) | H(29) | 125.3     | N(21) | C(35) | N(22) | 110.7(8) |
| N(21) | C(35) | C(36) | 115.6(8)  | N(22) | C(35) | C(36) | 133.6(9) |
| N(23) | C(36) | N(24) | 114.9(8)  | N(23) | C(36) | C(35) | 112.1(8) |
| N(24) | C(36) | C(35) | 132.9(8)  | O(1)  | C(37) | C(38) | 111.5(8) |
| O(1)  | C(37) | C(39) | 107.0(8)  | O(1)  | C(37) | H(31) | 108.7    |
| C(38) | C(37) | C(39) | 112.7(9)  | C(38) | C(37) | H(31) | 108.8    |
| C(39) | C(37) | H(31) | 107.9     | C(37) | C(38) | H(32) | 108.6    |
| C(37) | C(38) | H(33) | 109.5     | C(37) | C(38) | H(34) | 109.4    |
| H(32) | C(38) | H(33) | 109.2     | H(32) | C(38) | H(34) | 109.5    |
| H(33) | C(38) | H(34) | 110.6     | C(37) | C(39) | H(35) | 110.0    |
| C(37) | C(39) | H(36) | 109.5     | C(37) | C(39) | H(37) | 109.3    |
| H(35) | C(39) | H(36) | 109.8     | H(35) | C(39) | H(37) | 109.4    |
| H(36) | C(39) | H(37) | 108.7     | O(2)  | C(40) | C(41) | 107(1)   |
| O(2)  | C(40) | C(42) | 108(1)    | O(2)  | C(40) | H(39) | 105.6    |
| C(41) | C(40) | C(42) | 114(1)    | C(41) | C(40) | H(39) | 107.7    |
| C(42) | C(40) | H(39) | 112.4     | C(40) | C(41) | H(40) | 108.6    |
| C(40) | C(41) | H(41) | 111.5     | C(40) | C(41) | H(42) | 107.9    |
| H(40) | C(41) | H(41) | 114.5     | H(40) | C(41) | H(42) | 105.7    |
| H(41) | C(41) | H(42) | 108.2     | C(40) | C(42) | H(43) | 106.6    |
| C(40) | C(42) | H(44) | 104.9     | C(40) | C(42) | H(45) | 106.9    |
| H(43) | C(42) | H(44) | 112.2     | H(43) | C(42) | H(45) | 113.7    |
| H(44) | C(42) | H(45) | 111.8     | O(3)  | C(43) | C(44) | 109.7(9) |
| O(3)  | C(43) | C(45) | 111.0(10) | O(3)  | C(43) | H(47) | 108.2    |

Table 4. Bond Angles(°) (continued)

| atom  | atom  | atom  | angle  | atom  | atom  | atom  | angle |
|-------|-------|-------|--------|-------|-------|-------|-------|
| C(44) | C(43) | C(45) | 110(1) | C(44) | C(43) | H(47) | 108.9 |
| C(45) | C(43) | H(47) | 108.9  | C(43) | C(44) | H(48) | 110.5 |
| C(43) | C(44) | H(49) | 110.7  | C(43) | C(44) | H(50) | 109.7 |
| H(48) | C(44) | H(49) | 109.5  | H(48) | C(44) | H(50) | 107.8 |
| H(49) | C(44) | H(50) | 108.6  | C(43) | C(45) | H(51) | 109.7 |
| C(43) | C(45) | H(52) | 109.8  | C(43) | C(45) | H(53) | 109.8 |
| H(51) | C(45) | H(52) | 109.1  | H(51) | C(45) | H(53) | 109.6 |
| H(52) | C(45) | H(53) | 108.8  |       |       |       |       |
