# Supplementary material
Source: PubMed Central journal article supplement (PMC122701)
Supplement: pnas_072661699_5.pdf [file pnas_072661699_5.pdf]

## EXPERIMENTAL DETAILS

### A. Crystal Data

|                                                                        |                                                                                                                       |
|------------------------------------------------------------------------|-----------------------------------------------------------------------------------------------------------------------|
| Empirical Formula                                                      | $C_{45}H_{54}O_5N_{24}CO_2$                                                                                           |
| Formula Weight                                                         | 1128.95                                                                                                               |
| Crystal Color, Habit                                                   | red, prismatic                                                                                                        |
| Crystal Dimensions                                                     | 0.21 X 0.25 X 0.26 mm                                                                                                 |
| Crystal System                                                         | orthorhombic                                                                                                          |
| Lattice Type                                                           | Primitive                                                                                                             |
| No. of Reflections Used for Unit Cell Determination ( $2\theta$ range) | 12 ( 45.0 - 50.0° )                                                                                                   |
| Omega Scan Peak Width at Half-height                                   | 0.32°                                                                                                                 |
| Lattice Parameters                                                     | $a = 13.90(3) \text{ \AA}$<br>$b = 31.2(1) \text{ \AA}$<br>$c = 12.71(1) \text{ \AA}$<br>$V = 5516(19) \text{ \AA}^3$ |
| Space Group                                                            | $P2_12_12_1$ (#19)                                                                                                    |
| Z value                                                                | 4                                                                                                                     |
| $D_{calc}$                                                             | 1.359 g/cm <sup>3</sup>                                                                                               |
| $F_{000}$                                                              | 2344.00                                                                                                               |
| $\mu(\text{CuK}\alpha)$                                                | 52.63 cm <sup>-1</sup>                                                                                                |

### B. Intensity Measurements

|                |                                                                                  |
|----------------|----------------------------------------------------------------------------------|
| Diffractometer | Rigaku AFC7R (rotating anode)                                                    |
| Radiation      | $\text{CuK}\alpha$ ( $\lambda = 1.54178 \text{ \AA}$ )<br>graphite monochromated |
| Attenuator     | Ni foil (factor = 9.30)                                                          |

|                              |                                                                                                                                                         |
|------------------------------|---------------------------------------------------------------------------------------------------------------------------------------------------------|
| Temperature                  | -123.0 °C                                                                                                                                               |
| Collimator Size              | 1.0 mm                                                                                                                                                  |
| Take-off Angle               | 6.0°                                                                                                                                                    |
| Detector Aperture            | 9.0 mm horizontal<br>13.0 mm vertical                                                                                                                   |
| Crystal to Detector Distance | 235 mm                                                                                                                                                  |
| Scan Type                    | $\omega$ - $2\theta$                                                                                                                                    |
| Scan Rate                    | 8.0°/min (in $\omega$ ) (up to 5 scans)                                                                                                                 |
| Scan Width                   | $(1.15 + 0.30 \tan \theta)^\circ$                                                                                                                       |
| $2\theta_{max}$              | 120.7°                                                                                                                                                  |
| No. of Reflections Measured  | Total: 4214                                                                                                                                             |
| Corrections                  | Lorentz-polarization<br>Absorption<br>(trans. factors: 0.4759 - 0.9918)<br>Decay (0.37% increase)<br>Secondary Extinction<br>(coefficient: 1.37467e-06) |

### C. Structure Solution and Refinement

|                                                                        |                                                                              |
|------------------------------------------------------------------------|------------------------------------------------------------------------------|
| Structure Solution                                                     | Direct Methods (SHELXS-86)                                                   |
| Refinement                                                             | Full-matrix least-squares                                                    |
| Function Minimized                                                     | $\Sigma w( Fo  -  Fc )^2$                                                    |
| Least Squares Weights                                                  | $w = \frac{1}{\sigma^2(F_o)} = [\sigma_c^2(F_o) + \frac{v^2}{4} F_o^2]^{-1}$ |
| p-factor                                                               | 0.0600                                                                       |
| Anomalous Dispersion                                                   | All non-hydrogen atoms                                                       |
| No. of Observations ( $I > 3.00\sigma(I)$ , $2\theta < 120.66^\circ$ ) | 3327                                                                         |
| No. Variables                                                          | 686                                                                          |
| Reflection/Parameter Ratio                                             | 4.85                                                                         |
| Residuals: R; Rw                                                       | 0.049 ; 0.068                                                                |
| Residuals: R1                                                          | 0.049                                                                        |

|                                 |                            |
|---------------------------------|----------------------------|
| No. of Reflections to calc R1   | 3327                       |
| Goodness of Fit Indicator       | 1.76                       |
| Max Shift/Error in Final Cycle  | 0.051                      |
| Maximum peak in Final Diff. Map | $0.55 e^{-}/\text{\AA}^3$  |
| Minimum peak in Final Diff. Map | $-0.44 e^{-}/\text{\AA}^3$ |

Table 1. Atomic coordinates and  $B_{iso}/B_{eq}$ 

| atom  | x          | y          | z          | $B_{eq}$ |
|-------|------------|------------|------------|----------|
| Co(1) | 0.39980(8) | 0.31065(4) | 0.4975(1)  | 3.32(3)  |
| Co(2) | 0.65570(8) | 0.44463(4) | 0.11454(9) | 2.99(3)  |
| O(1)  | 0.2654(4)  | 0.4093(2)  | 0.8762(4)  | 4.3(1)   |
| O(4)  | 0.1890(4)  | 0.4493(2)  | 1.0568(5)  | 5.3(2)   |
| O(6)  | 0.2312(4)  | 0.6615(2)  | 0.5143(5)  | 5.3(2)   |
| O(7)  | 0.3415(4)  | 0.5792(2)  | 0.7635(6)  | 5.5(2)   |
| O(8)  | 0.4056(6)  | 0.6701(3)  | 0.6049(5)  | 8.1(2)   |
| N(1)  | 0.4464(4)  | 0.4422(2)  | -0.1001(5) | 3.9(2)   |
| N(2)  | 0.3715(4)  | 0.4374(2)  | 0.1441(5)  | 3.8(2)   |
| N(3)  | 0.7428(4)  | 0.3232(2)  | 0.1420(5)  | 3.4(1)   |
| N(4)  | 0.4090(4)  | 0.2495(2)  | 0.4852(5)  | 3.3(1)   |
| N(5)  | 0.6406(4)  | 0.3625(2)  | 0.6086(5)  | 3.8(2)   |
| N(6)  | 0.6760(4)  | 0.3850(2)  | 0.0879(4)  | 3.1(1)   |
| N(7)  | 0.7129(4)  | 0.4304(2)  | 0.2483(5)  | 3.0(1)   |
| N(8)  | 0.3929(4)  | 0.3708(2)  | 0.5205(5)  | 3.4(1)   |
| N(9)  | 0.7761(5)  | 0.3817(2)  | 0.3527(5)  | 3.8(2)   |
| N(10) | 0.3736(4)  | 0.1850(2)  | 0.5548(5)  | 3.3(1)   |
| N(11) | 0.5876(4)  | 0.4512(2)  | -0.0166(5) | 3.3(1)   |
| N(12) | 0.5295(4)  | 0.3195(2)  | 0.5481(5)  | 3.4(1)   |
| N(13) | 0.2715(4)  | 0.3117(2)  | 0.4420(5)  | 3.7(2)   |
| N(14) | 0.7796(4)  | 0.4578(2)  | 0.0572(5)  | 3.0(1)   |
| N(16) | 0.1758(5)  | 0.3266(2)  | 0.3071(5)  | 4.0(2)   |
| N(17) | 0.7462(4)  | 0.5644(2)  | 0.1647(5)  | 3.2(1)   |
| N(18) | 0.4706(5)  | 0.4325(2)  | 0.5590(5)  | 3.4(1)   |

Table 1. Atomic coordinates and  $B_{iso}/B_{eq}$  (continued)

| atom  | x         | y         | z          | $B_{eq}$ |
|-------|-----------|-----------|------------|----------|
| N(20) | 0.4318(5) | 0.3182(2) | 0.3515(5)  | 3.7(2)   |
| N(21) | 0.3053(5) | 0.2470(2) | 0.7474(5)  | 3.7(2)   |
| N(22) | 0.3851(5) | 0.3265(2) | 0.1856(5)  | 4.2(2)   |
| N(24) | 0.3553(5) | 0.2968(2) | 0.6365(5)  | 3.6(1)   |
| N(25) | 0.9021(4) | 0.5030(2) | 0.0458(5)  | 3.6(1)   |
| N(26) | 0.6576(4) | 0.5037(2) | 0.1498(5)  | 3.4(1)   |
| N(27) | 0.5282(4) | 0.4373(2) | 0.1699(5)  | 3.2(1)   |
| C(1)  | 0.6051(6) | 0.4520(2) | -0.1216(6) | 3.4(2)   |
| C(2)  | 0.7430(5) | 0.5242(2) | 0.1340(6)  | 2.9(2)   |
| C(3)  | 0.4893(5) | 0.4444(3) | -0.0066(7) | 3.6(2)   |
| C(4)  | 0.6089(6) | 0.2949(3) | 0.5756(7)  | 3.8(2)   |
| C(5)  | 0.4750(5) | 0.3903(2) | 0.5498(6)  | 3.2(2)   |
| C(6)  | 0.7394(5) | 0.3896(2) | 0.2565(5)  | 2.9(2)   |
| C(7)  | 0.8111(5) | 0.4966(3) | 0.0795(5)  | 3.1(2)   |
| C(8)  | 0.8530(5) | 0.4369(2) | 0.0059(6)  | 3.4(2)   |
| C(9)  | 0.3725(5) | 0.2277(3) | 0.5664(6)  | 3.1(2)   |
| C(10) | 0.3863(6) | 0.4332(3) | 0.2496(7)  | 3.9(2)   |
| C(11) | 0.4607(5) | 0.4392(3) | 0.0978(6)  | 3.3(2)   |
| C(12) | 0.6017(5) | 0.5350(3) | 0.1974(6)  | 3.5(2)   |
| C(13) | 0.1792(6) | 0.3132(3) | 0.4789(6)  | 4.0(2)   |
| C(14) | 0.7323(5) | 0.4496(3) | 0.3426(6)  | 3.4(2)   |
| C(15) | 0.3590(6) | 0.3233(3) | 0.2876(6)  | 3.6(2)   |
| C(16) | 0.3418(5) | 0.2548(2) | 0.6512(6)  | 3.3(2)   |
| C(17) | 0.6699(5) | 0.3560(3) | 0.0074(6)  | 3.6(2)   |

Table 1. Atomic coordinates and  $B_{iso}/B_{eq}$  (continued)

| atom  | x         | y         | z          | $B_{eq}$ |
|-------|-----------|-----------|------------|----------|
| C(18) | 0.6559(6) | 0.5717(3) | 0.2059(6)  | 3.6(2)   |
| C(19) | 0.4845(6) | 0.4331(3) | 0.2662(6)  | 3.4(2)   |
| C(20) | 0.5190(6) | 0.4469(3) | -0.1722(6) | 4.2(2)   |
| C(21) | 0.2657(5) | 0.3199(3) | 0.3396(6)  | 3.6(2)   |
| C(23) | 0.5509(6) | 0.3599(3) | 0.5700(7)  | 3.8(2)   |
| C(24) | 0.2187(7) | 0.4198(3) | 0.7790(7)  | 4.7(2)   |
| C(25) | 0.9291(5) | 0.4643(3) | -0.0010(7) | 3.8(2)   |
| C(26) | 0.4135(6) | 0.1798(3) | 0.4558(7)  | 4.1(2)   |
| C(27) | 0.7723(6) | 0.4202(3) | 0.4055(6)  | 3.7(2)   |
| C(28) | 0.3284(5) | 0.4034(3) | 0.5069(6)  | 3.8(2)   |
| C(29) | 0.4881(6) | 0.3252(3) | 0.1892(6)  | 4.1(2)   |
| C(30) | 0.6773(6) | 0.3220(3) | 0.6137(8)  | 4.4(2)   |
| C(31) | 0.1217(6) | 0.3219(3) | 0.3958(7)  | 4.2(2)   |
| C(32) | 0.5142(6) | 0.3198(3) | 0.2889(7)  | 4.1(2)   |
| C(33) | 0.3757(5) | 0.4419(3) | 0.5322(6)  | 3.5(2)   |
| C(34) | 0.3261(6) | 0.3167(3) | 0.7257(6)  | 4.2(2)   |
| C(35) | 0.7115(6) | 0.3188(3) | 0.0416(6)  | 3.8(2)   |
| C(36) | 0.4362(5) | 0.2190(3) | 0.4130(6)  | 3.6(2)   |
| C(37) | 0.2951(6) | 0.2872(3) | 0.7950(7)  | 4.4(2)   |
| C(38) | 0.4272(6) | 0.5573(3) | 0.7992(9)  | 5.5(2)   |
| C(39) | 0.1262(7) | 0.3945(4) | 0.7752(9)  | 6.3(3)   |
| C(40) | 0.2012(7) | 0.4663(3) | 0.7705(8)  | 5.9(3)   |
| C(41) | 0.4292(8) | 0.5545(3) | 0.9178(9)  | 6.3(3)   |
| C(42) | 0.5142(7) | 0.5787(4) | 0.7571(10) | 6.4(3)   |

Table 1. Atomic coordinates and  $B_{iso}/B_{eq}$  (continued)

| atom  | x         | y          | z         | $B_{eq}$ |
|-------|-----------|------------|-----------|----------|
| C(43) | 0.4867(8) | 0.6985(5)  | 0.592(1)  | 9.0(4)   |
| C(44) | 0.510(1)  | 0.6963(10) | 0.477(1)  | 19.8(9)  |
| C(45) | 0.465(1)  | 0.7422(6)  | 0.628(2)  | 13.8(7)  |
| C(46) | 0.7209(5) | 0.3642(3)  | 0.1653(6) | 3.3(2)   |
| H(1)  | 0.3786    | 0.4372     | -0.1153   | 4.1      |
| H(2)  | 0.7700    | 0.3016     | 0.1856    | 3.7      |
| H(3)  | 0.6749    | 0.3904     | 0.6285    | 4.3      |
| H(4)  | 0.3544    | 0.1621     | 0.6041    | 3.6      |
| H(5)  | 0.1528    | 0.3326     | 0.2347    | 4.8      |
| H(6)  | 0.7975    | 0.5854     | 0.1569    | 3.3      |
| H(7)  | 0.6678    | 0.4553     | -0.1574   | 3.6      |
| H(8)  | 0.6142    | 0.2635     | 0.5726    | 4.5      |
| H(9)  | 0.8535    | 0.4069     | -0.0233   | 4.6      |
| H(10) | 0.3361    | 0.4290     | 0.3038    | 3.7      |
| H(11) | 0.5345    | 0.5305     | 0.2248    | 3.6      |
| H(12) | 0.1555    | 0.3105     | 0.5565    | 5.2      |
| H(13) | 0.7215    | 0.4805     | 0.3610    | 3.5      |
| H(14) | 0.6427    | 0.3612     | -0.0640   | 3.7      |
| H(15) | 0.6329    | 0.5996     | 0.2371    | 4.1      |
| H(16) | 0.5170    | 0.4317     | 0.3386    | 3.4      |
| H(17) | 0.5080    | 0.4481     | -0.2508   | 5.0      |
| H(18) | 0.9915    | 0.4594     | -0.0346   | 4.1      |
| H(19) | 0.4241    | 0.1517     | 0.4206    | 4.3      |
| H(20) | 0.7901    | 0.4243     | 0.4786    | 4.0      |

Table 1. Atomic coordinates and  $B_{iso}/B_{eq}$  (continued)

| atom  | x      | y      | z       | $B_{eq}$ |
|-------|--------|--------|---------|----------|
| H(21) | 0.2584 | 0.4017 | 0.4861  | 3.7      |
| H(22) | 0.5312 | 0.3278 | 0.1271  | 4.7      |
| H(23) | 0.7419 | 0.3170 | 0.6398  | 5.2      |
| H(24) | 0.0520 | 0.3264 | 0.3969  | 4.5      |
| H(25) | 0.5797 | 0.3204 | 0.3125  | 4.4      |
| H(26) | 0.3449 | 0.4712 | 0.5294  | 4.1      |
| H(27) | 0.3266 | 0.3492 | 0.7409  | 4.7      |
| H(28) | 0.7175 | 0.2935 | -0.0038 | 4.2      |
| H(29) | 0.4685 | 0.2241 | 0.3420  | 4.1      |
| H(30) | 0.2706 | 0.2930 | 0.8684  | 5.1      |
| H(31) | 0.2578 | 0.4105 | 0.7178  | 4.7      |
| H(32) | 0.4234 | 0.5258 | 0.7735  | 6.9      |
| H(33) | 0.0858 | 0.4017 | 0.8354  | 6.5      |
| H(34) | 0.0889 | 0.3975 | 0.7138  | 6.5      |
| H(35) | 0.1389 | 0.3634 | 0.7838  | 6.5      |
| H(36) | 0.2609 | 0.4833 | 0.7768  | 6.0      |
| H(37) | 0.1720 | 0.4763 | 0.7051  | 6.0      |
| H(38) | 0.1599 | 0.4771 | 0.8264  | 6.0      |
| H(39) | 0.4797 | 0.5384 | 0.9478  | 6.6      |
| H(40) | 0.4312 | 0.5832 | 0.9476  | 6.6      |
| H(41) | 0.3685 | 0.5421 | 0.9485  | 6.6      |
| H(42) | 0.5690 | 0.5632 | 0.7798  | 7.3      |
| H(43) | 0.5092 | 0.5795 | 0.6849  | 7.3      |
| H(44) | 0.5130 | 0.6061 | 0.7878  | 7.3      |



Table 1. Atomic coordinates and  $B_{iso}/B_{eq}$  (continued)

| atom  | x      | y      | z      | $B_{eq}$ |
|-------|--------|--------|--------|----------|
| H(45) | 0.5434 | 0.6886 | 0.6270 | 10.7     |
| H(46) | 0.5271 | 0.6679 | 0.4536 | 18.3     |
| H(47) | 0.4565 | 0.7055 | 0.4331 | 18.3     |
| H(48) | 0.5641 | 0.7148 | 0.4558 | 18.3     |
| H(49) | 0.5235 | 0.7602 | 0.6114 | 12.9     |
| H(50) | 0.4159 | 0.7536 | 0.5832 | 12.9     |
| H(51) | 0.4527 | 0.7426 | 0.6953 | 12.9     |
| H(52) | 0.3948 | 0.6649 | 0.6777 | 6.7      |
| H(53) | 0.2807 | 0.6685 | 0.5216 | 6.7      |
| H(54) | 0.1885 | 0.6782 | 0.5227 | 6.7      |
| H(55) | 0.3384 | 0.6158 | 0.7673 | 6.7      |
| H(56) | 0.2298 | 0.3947 | 0.9273 | 6.7      |
| H(57) | 0.1696 | 0.4169 | 1.0766 | 6.7      |
| H(58) | 0.2115 | 0.4283 | 0.9791 | 6.7      |

$$B_{eq} = \frac{8}{3}\pi^2(U_{11}(aa^*)^2 + U_{22}(bb^*)^2 + U_{33}(cc^*)^2 + 2U_{12}aa^*bb^* \cos \gamma + 2U_{13}aa^*cc^* \cos \beta + 2U_{23}bb^*cc^* \cos \alpha)$$

Table 2. Anisotropic Displacement Parameters

| atom  | $U_{11}$  | $U_{22}$  | $U_{33}$  | $U_{12}$   | $U_{13}$   | $U_{23}$  |
|-------|-----------|-----------|-----------|------------|------------|-----------|
| Co(1) | 0.0204(6) | 0.0582(7) | 0.0475(7) | -0.0033(6) | 0.0032(6)  | 0.0011(7) |
| Co(2) | 0.0158(6) | 0.0599(7) | 0.0378(7) | -0.0017(6) | -0.0002(5) | 0.0027(6) |
| O(1)  | 0.033(3)  | 0.081(4)  | 0.049(3)  | -0.004(3)  | -0.001(3)  | 0.010(3)  |
| O(4)  | 0.028(3)  | 0.093(4)  | 0.080(4)  | 0.008(3)   | 0.004(3)   | -0.004(4) |
| O(6)  | 0.043(3)  | 0.100(5)  | 0.060(4)  | 0.001(3)   | -0.001(3)  | 0.002(4)  |
| O(7)  | 0.035(3)  | 0.079(4)  | 0.096(5)  | 0.010(3)   | -0.006(4)  | -0.007(4) |
| O(8)  | 0.064(5)  | 0.193(9)  | 0.052(4)  | -0.007(5)  | -0.004(4)  | 0.006(5)  |
| N(1)  | 0.020(3)  | 0.080(5)  | 0.048(4)  | -0.005(3)  | -0.002(3)  | 0.003(4)  |
| N(2)  | 0.027(4)  | 0.078(5)  | 0.038(4)  | 0.000(3)   | 0.003(3)   | 0.006(3)  |
| N(3)  | 0.029(4)  | 0.061(4)  | 0.040(4)  | 0.007(3)   | -0.002(3)  | 0.000(3)  |
| N(4)  | 0.019(3)  | 0.070(4)  | 0.038(4)  | 0.000(3)   | 0.005(3)   | -0.006(3) |
| N(5)  | 0.017(3)  | 0.067(4)  | 0.060(4)  | -0.004(3)  | -0.001(3)  | -0.004(4) |
| N(6)  | 0.021(3)  | 0.066(4)  | 0.030(3)  | -0.004(3)  | -0.001(3)  | 0.002(3)  |
| N(7)  | 0.023(3)  | 0.054(4)  | 0.035(3)  | 0.001(3)   | 0.000(3)   | -0.001(3) |
| N(8)  | 0.016(3)  | 0.060(4)  | 0.051(4)  | -0.003(3)  | 0.003(3)   | 0.000(3)  |
| N(9)  | 0.032(3)  | 0.073(4)  | 0.038(4)  | -0.001(3)  | 0.007(3)   | -0.008(3) |
| N(10) | 0.026(4)  | 0.058(4)  | 0.042(4)  | -0.003(3)  | 0.001(3)   | 0.006(3)  |
| N(11) | 0.020(3)  | 0.064(4)  | 0.042(4)  | -0.003(3)  | -0.005(3)  | 0.004(3)  |
| N(12) | 0.019(3)  | 0.059(4)  | 0.051(4)  | -0.002(3)  | 0.003(3)   | 0.000(3)  |
| N(13) | 0.016(3)  | 0.078(5)  | 0.045(4)  | -0.013(3)  | 0.006(3)   | -0.002(4) |
| N(14) | 0.017(3)  | 0.051(4)  | 0.045(4)  | -0.010(3)  | -0.001(3)  | 0.004(3)  |
| N(16) | 0.027(4)  | 0.079(5)  | 0.045(4)  | 0.003(3)   | -0.010(3)  | 0.000(4)  |
| N(17) | 0.021(3)  | 0.059(4)  | 0.040(3)  | -0.002(3)  | 0.001(3)   | 0.003(3)  |
| N(18) | 0.025(3)  | 0.065(4)  | 0.040(4)  | 0.004(3)   | -0.004(3)  | 0.003(3)  |

Table 2. Anisotropic Displacement Parameters (continued)

| atom  | $U_{11}$ | $U_{22}$ | $U_{33}$ | $U_{12}$  | $U_{13}$  | $U_{23}$  |
|-------|----------|----------|----------|-----------|-----------|-----------|
| N(20) | 0.035(4) | 0.059(4) | 0.047(4) | 0.002(3)  | -0.002(3) | 0.001(3)  |
| N(21) | 0.038(4) | 0.054(4) | 0.048(4) | 0.003(3)  | 0.005(3)  | -0.009(3) |
| N(22) | 0.033(4) | 0.076(5) | 0.050(4) | -0.005(3) | 0.005(4)  | 0.002(4)  |
| N(24) | 0.028(3) | 0.059(4) | 0.051(4) | 0.006(3)  | -0.001(3) | 0.003(3)  |
| N(25) | 0.017(3) | 0.072(4) | 0.046(4) | 0.005(3)  | 0.003(3)  | -0.002(3) |
| N(26) | 0.016(3) | 0.065(4) | 0.048(4) | 0.006(3)  | 0.000(3)  | 0.012(3)  |
| N(27) | 0.026(3) | 0.065(4) | 0.032(3) | 0.000(3)  | -0.002(3) | 0.005(3)  |
| C(1)  | 0.032(4) | 0.065(5) | 0.031(4) | -0.013(4) | 0.003(4)  | -0.003(4) |
| C(2)  | 0.022(4) | 0.049(4) | 0.038(4) | -0.001(3) | -0.004(3) | 0.003(4)  |
| C(3)  | 0.020(4) | 0.069(5) | 0.047(5) | 0.002(4)  | 0.001(4)  | 0.003(5)  |
| C(4)  | 0.027(4) | 0.057(5) | 0.063(5) | 0.006(4)  | 0.009(4)  | 0.002(4)  |
| C(5)  | 0.020(4) | 0.053(5) | 0.048(5) | 0.002(4)  | 0.007(4)  | 0.001(4)  |
| C(6)  | 0.017(4) | 0.063(5) | 0.030(4) | 0.002(4)  | 0.001(3)  | 0.002(3)  |
| C(7)  | 0.015(4) | 0.069(5) | 0.032(4) | -0.001(4) | 0.000(3)  | 0.010(4)  |
| C(8)  | 0.014(4) | 0.062(4) | 0.052(5) | 0.008(4)  | -0.001(4) | -0.003(4) |
| C(9)  | 0.019(4) | 0.060(5) | 0.039(4) | 0.000(3)  | 0.002(4)  | 0.000(4)  |
| C(10) | 0.023(4) | 0.070(5) | 0.056(5) | 0.001(4)  | 0.002(4)  | -0.004(4) |
| C(11) | 0.018(4) | 0.061(5) | 0.047(5) | 0.002(4)  | 0.000(4)  | 0.003(4)  |
| C(12) | 0.025(4) | 0.072(5) | 0.035(4) | 0.003(4)  | 0.003(4)  | 0.004(4)  |
| C(13) | 0.023(4) | 0.079(6) | 0.050(5) | -0.005(4) | 0.001(4)  | -0.007(4) |
| C(14) | 0.025(4) | 0.073(5) | 0.032(4) | 0.017(4)  | -0.002(4) | -0.004(4) |
| C(15) | 0.024(4) | 0.066(5) | 0.046(5) | -0.005(4) | 0.002(4)  | 0.000(4)  |
| C(16) | 0.022(4) | 0.065(5) | 0.038(4) | 0.006(4)  | -0.002(4) | 0.006(4)  |
| C(17) | 0.024(4) | 0.080(5) | 0.033(4) | 0.001(4)  | 0.002(4)  | -0.006(4) |

Table 2. Anisotropic Displacement Parameters (continued)

| atom  | U <sub>11</sub> | U <sub>22</sub> | U <sub>33</sub> | U <sub>12</sub> | U <sub>13</sub> | U <sub>23</sub> |
|-------|-----------------|-----------------|-----------------|-----------------|-----------------|-----------------|
| C(18) | 0.030(4)        | 0.066(5)        | 0.041(4)        | 0.007(4)        | 0.005(4)        | -0.002(4)       |
| C(19) | 0.027(4)        | 0.067(5)        | 0.037(4)        | -0.004(4)       | 0.002(4)        | 0.003(4)        |
| C(20) | 0.040(5)        | 0.079(6)        | 0.040(5)        | 0.004(5)        | -0.004(4)       | -0.001(4)       |
| C(21) | 0.017(4)        | 0.078(6)        | 0.044(5)        | -0.001(4)       | 0.002(4)        | 0.006(4)        |
| C(23) | 0.024(4)        | 0.068(5)        | 0.053(5)        | -0.006(4)       | 0.001(4)        | 0.007(4)        |
| C(24) | 0.048(6)        | 0.082(6)        | 0.047(5)        | -0.005(5)       | -0.001(5)       | -0.003(5)       |
| C(25) | 0.018(4)        | 0.074(5)        | 0.053(5)        | 0.003(4)        | 0.007(4)        | -0.015(5)       |
| C(26) | 0.027(5)        | 0.077(6)        | 0.053(5)        | -0.004(4)       | 0.001(4)        | -0.001(5)       |
| C(27) | 0.034(4)        | 0.075(5)        | 0.032(4)        | -0.001(4)       | -0.003(4)       | -0.004(4)       |
| C(28) | 0.017(4)        | 0.078(5)        | 0.050(5)        | -0.004(4)       | -0.002(4)       | 0.005(5)        |
| C(29) | 0.030(4)        | 0.082(6)        | 0.045(5)        | -0.015(4)       | 0.018(4)        | -0.008(4)       |
| C(30) | 0.024(4)        | 0.066(5)        | 0.079(6)        | 0.005(4)        | 0.000(5)        | 0.005(5)        |
| C(31) | 0.037(5)        | 0.064(5)        | 0.060(5)        | -0.012(4)       | 0.010(5)        | -0.002(4)       |
| C(32) | 0.024(4)        | 0.082(6)        | 0.052(5)        | -0.006(4)       | 0.021(4)        | -0.001(5)       |
| C(33) | 0.024(4)        | 0.067(5)        | 0.044(5)        | 0.002(4)        | -0.003(4)       | 0.004(4)        |
| C(34) | 0.042(5)        | 0.083(6)        | 0.035(4)        | -0.004(5)       | 0.015(4)        | -0.003(4)       |
| C(35) | 0.029(4)        | 0.069(5)        | 0.047(5)        | 0.005(4)        | -0.002(4)       | -0.003(4)       |
| C(36) | 0.019(4)        | 0.074(5)        | 0.046(5)        | -0.004(4)       | 0.003(4)        | 0.003(4)        |
| C(37) | 0.041(5)        | 0.069(5)        | 0.057(5)        | 0.008(4)        | 0.011(5)        | -0.001(5)       |
| C(38) | 0.032(5)        | 0.077(6)        | 0.101(8)        | 0.012(5)        | -0.014(5)       | -0.004(6)       |
| C(39) | 0.045(6)        | 0.100(7)        | 0.095(8)        | 0.008(5)        | -0.020(6)       | 0.003(6)        |
| C(40) | 0.053(6)        | 0.085(7)        | 0.084(7)        | 0.012(5)        | -0.008(6)       | 0.007(6)        |
| C(41) | 0.067(7)        | 0.071(6)        | 0.100(8)        | 0.021(6)        | 0.004(7)        | 0.009(6)        |
| C(42) | 0.033(5)        | 0.120(9)        | 0.091(8)        | 0.003(6)        | -0.006(6)       | -0.021(7)       |

Table 2. Anisotropic Displacement Parameters (continued)

| atom  | U <sub>11</sub> | U <sub>22</sub> | U <sub>33</sub> | U <sub>12</sub> | U <sub>13</sub> | U <sub>23</sub> |
|-------|-----------------|-----------------|-----------------|-----------------|-----------------|-----------------|
| C(43) | 0.039(6)        | 0.19(1)         | 0.11(1)         | -0.033(8)       | -0.019(7)       | 0.04(1)         |
| C(44) | 0.10(1)         | 0.54(5)         | 0.11(1)         | -0.05(2)        | 0.04(1)         | 0.06(2)         |
| C(45) | 0.09(1)         | 0.18(2)         | 0.25(2)         | -0.03(1)        | -0.03(1)        | 0.09(2)         |
| C(46) | 0.019(4)        | 0.065(5)        | 0.040(4)        | -0.001(4)       | -0.001(4)       | 0.001(4)        |

The general temperature factor expression:

$$\exp(-2\pi^2(a^*U_{11}h^2 + b^*U_{22}k^2 + c^*U_{33}l^2 + 2a^*b^*U_{12}hk + 2a^*c^*U_{13}hl + 2b^*c^*U_{23}kl))$$

Table 3. Bond Lengths( $\text{\AA}$ )

| atom  | atom  | distance  | atom  | atom  | distance  |
|-------|-------|-----------|-------|-------|-----------|
| Co(1) | N(4)  | 1.918(7)  | Co(1) | N(8)  | 1.904(6)  |
| Co(1) | N(12) | 1.934(7)  | Co(1) | N(13) | 1.918(7)  |
| Co(1) | N(20) | 1.922(7)  | Co(1) | N(24) | 1.921(7)  |
| Co(2) | N(6)  | 1.913(6)  | Co(2) | N(7)  | 1.930(6)  |
| Co(2) | N(11) | 1.929(6)  | Co(2) | N(14) | 1.915(7)  |
| Co(2) | N(26) | 1.897(6)  | Co(2) | N(27) | 1.921(7)  |
| O(1)  | C(24) | 1.43(1)   | O(1)  | H(56) | 0.94      |
| O(4)  | H(57) | 1.08      | O(4)  | H(58) | 1.22      |
| O(6)  | H(53) | 0.73      | O(6)  | H(54) | 0.80      |
| O(7)  | C(38) | 1.45(1)   | O(7)  | H(55) | 1.14      |
| O(8)  | C(43) | 1.45(1)   | O(8)  | H(52) | 0.95      |
| N(1)  | C(3)  | 1.33(1)   | N(1)  | C(20) | 1.37(1)   |
| N(1)  | H(1)  | 0.98      | N(2)  | C(10) | 1.36(1)   |
| N(2)  | C(11) | 1.374(10) | N(3)  | C(35) | 1.355(10) |
| N(3)  | C(46) | 1.347(10) | N(3)  | H(2)  | 0.95      |
| N(4)  | C(9)  | 1.337(10) | N(4)  | C(36) | 1.38(1)   |
| N(5)  | C(23) | 1.34(1)   | N(5)  | C(30) | 1.37(1)   |
| N(5)  | H(3)  | 1.02      | N(6)  | C(17) | 1.368(10) |
| N(6)  | C(46) | 1.334(9)  | N(7)  | C(6)  | 1.331(9)  |
| N(7)  | C(14) | 1.365(9)  | N(8)  | C(5)  | 1.345(10) |
| N(8)  | C(28) | 1.368(10) | N(9)  | C(6)  | 1.347(9)  |
| N(9)  | C(27) | 1.38(1)   | N(10) | C(9)  | 1.34(1)   |
| N(10) | C(26) | 1.38(1)   | N(10) | H(4)  | 0.99      |
| N(11) | C(1)  | 1.357(10) | N(11) | C(3)  | 1.389(10) |

Table 3. Bond Lengths( $\text{\AA}$ ) (continued)

| atom  | atom  | distance  | atom  | atom  | distance  |
|-------|-------|-----------|-------|-------|-----------|
| N(12) | C(4)  | 1.39(1)   | N(12) | C(23) | 1.33(1)   |
| N(13) | C(13) | 1.37(1)   | N(13) | C(21) | 1.330(10) |
| N(14) | C(7)  | 1.319(10) | N(14) | C(8)  | 1.375(9)  |
| N(16) | C(21) | 1.33(1)   | N(16) | C(31) | 1.36(1)   |
| N(16) | H(5)  | 0.99      | N(17) | C(2)  | 1.316(9)  |
| N(17) | C(18) | 1.379(10) | N(17) | H(6)  | 0.97      |
| N(18) | C(5)  | 1.323(10) | N(18) | C(33) | 1.39(1)   |
| N(20) | C(15) | 1.31(1)   | N(20) | C(32) | 1.40(1)   |
| N(21) | C(16) | 1.346(10) | N(21) | C(37) | 1.40(1)   |
| N(22) | C(15) | 1.35(1)   | N(22) | C(29) | 1.43(1)   |
| N(24) | C(16) | 1.340(10) | N(24) | C(34) | 1.356(10) |
| N(25) | C(7)  | 1.352(9)  | N(25) | C(25) | 1.398(10) |
| N(26) | C(2)  | 1.363(10) | N(26) | C(12) | 1.388(10) |
| N(27) | C(11) | 1.313(9)  | N(27) | C(19) | 1.373(10) |
| C(1)  | C(20) | 1.37(1)   | C(1)  | H(7)  | 0.99      |
| C(2)  | C(7)  | 1.45(1)   | C(3)  | C(11) | 1.40(1)   |
| C(4)  | C(30) | 1.36(1)   | C(4)  | H(8)  | 0.98      |
| C(5)  | C(23) | 1.44(1)   | C(6)  | C(46) | 1.43(1)   |
| C(8)  | C(25) | 1.36(1)   | C(8)  | H(9)  | 1.01      |
| C(9)  | C(16) | 1.43(1)   | C(10) | C(19) | 1.38(1)   |
| C(10) | H(10) | 0.99      | C(12) | C(18) | 1.37(1)   |
| C(12) | H(11) | 1.01      | C(13) | C(31) | 1.35(1)   |
| C(13) | H(12) | 1.04      | C(14) | C(27) | 1.34(1)   |
| C(14) | H(13) | 1.00      | C(15) | C(21) | 1.46(1)   |

Table 3. Bond Lengths( $\text{\AA}$ ) (continued)

| atom  | atom  | distance | atom  | atom  | distance |
|-------|-------|----------|-------|-------|----------|
| C(17) | C(35) | 1.37(1)  | C(17) | H(14) | 1.00     |
| C(18) | H(15) | 1.01     | C(19) | H(16) | 1.03     |
| C(20) | H(17) | 1.01     | C(24) | C(39) | 1.51(1)  |
| C(24) | C(40) | 1.48(1)  | C(24) | H(31) | 0.99     |
| C(25) | H(18) | 0.98     | C(26) | C(36) | 1.38(1)  |
| C(26) | H(19) | 0.99     | C(27) | H(20) | 0.97     |
| C(28) | C(33) | 1.41(1)  | C(28) | H(21) | 1.01     |
| C(29) | C(32) | 1.33(1)  | C(29) | H(22) | 0.99     |
| C(30) | H(23) | 0.97     | C(31) | H(24) | 0.98     |
| C(32) | H(25) | 0.96     | C(33) | H(26) | 1.01     |
| C(34) | C(37) | 1.35(1)  | C(34) | H(27) | 1.03     |
| C(35) | H(28) | 0.98     | C(36) | H(29) | 1.02     |
| C(37) | H(30) | 1.01     | C(38) | C(41) | 1.51(2)  |
| C(38) | C(42) | 1.48(1)  | C(38) | H(32) | 1.04     |
| C(39) | H(33) | 0.98     | C(39) | H(34) | 0.94     |
| C(39) | H(35) | 0.99     | C(40) | H(36) | 0.99     |
| C(40) | H(37) | 0.98     | C(40) | H(38) | 0.97     |
| C(41) | H(39) | 0.94     | C(41) | H(40) | 0.97     |
| C(41) | H(41) | 1.01     | C(42) | H(42) | 0.95     |
| C(42) | H(43) | 0.92     | C(42) | H(44) | 0.94     |
| C(43) | C(44) | 1.49(2)  | C(43) | C(45) | 1.47(2)  |
| C(43) | H(45) | 0.96     | C(44) | H(46) | 0.96     |
| C(44) | H(47) | 0.98     | C(44) | H(48) | 0.98     |
| C(45) | H(49) | 1.01     | C(45) | H(50) | 0.96     |



Table 3. Bond Lengths( $\text{\AA}$ ) (continued)

| atom  | atom  | distance | atom | atom | distance |
|-------|-------|----------|------|------|----------|
| C(45) | H(51) | 0.87     |      |      |          |

Table 4. Bond Angles(°)

| atom  | atom  | atom  | angle    | atom  | atom  | atom  | angle    |
|-------|-------|-------|----------|-------|-------|-------|----------|
| N(4)  | Co(1) | N(8)  | 175.7(3) | N(4)  | Co(1) | N(12) | 96.1(3)  |
| N(4)  | Co(1) | N(13) | 92.8(3)  | N(4)  | Co(1) | N(20) | 91.7(3)  |
| N(4)  | Co(1) | N(24) | 82.7(3)  | N(8)  | Co(1) | N(12) | 81.6(3)  |
| N(8)  | Co(1) | N(13) | 89.6(3)  | N(8)  | Co(1) | N(20) | 92.2(3)  |
| N(8)  | Co(1) | N(24) | 93.6(3)  | N(12) | Co(1) | N(13) | 170.6(3) |
| N(12) | Co(1) | N(20) | 95.1(3)  | N(12) | Co(1) | N(24) | 91.5(3)  |
| N(13) | Co(1) | N(20) | 81.9(3)  | N(13) | Co(1) | N(24) | 92.4(3)  |
| N(20) | Co(1) | N(24) | 171.8(3) | N(6)  | Co(2) | N(7)  | 82.6(3)  |
| N(6)  | Co(2) | N(11) | 91.3(3)  | N(6)  | Co(2) | N(14) | 90.5(3)  |
| N(6)  | Co(2) | N(26) | 170.2(3) | N(6)  | Co(2) | N(27) | 94.9(3)  |
| N(7)  | Co(2) | N(11) | 171.6(3) | N(7)  | Co(2) | N(14) | 90.8(3)  |
| N(7)  | Co(2) | N(26) | 90.5(3)  | N(7)  | Co(2) | N(27) | 91.8(3)  |
| N(11) | Co(2) | N(14) | 95.2(3)  | N(11) | Co(2) | N(26) | 96.2(3)  |
| N(11) | Co(2) | N(27) | 82.9(3)  | N(14) | Co(2) | N(26) | 82.5(3)  |
| N(14) | Co(2) | N(27) | 174.3(3) | N(26) | Co(2) | N(27) | 92.4(3)  |
| C(24) | O(1)  | H(56) | 118.0    | H(57) | O(4)  | H(58) | 75.6     |
| H(53) | O(6)  | H(54) | 119.5    | C(38) | O(7)  | H(55) | 119.2    |
| C(43) | O(8)  | H(52) | 109.8    | C(3)  | N(1)  | C(20) | 105.1(6) |
| C(3)  | N(1)  | H(1)  | 128.2    | C(20) | N(1)  | H(1)  | 126.6    |
| C(10) | N(2)  | C(11) | 106.8(7) | C(35) | N(3)  | C(46) | 103.4(6) |
| C(35) | N(3)  | H(2)  | 127.2    | C(46) | N(3)  | H(2)  | 129.3    |
| Co(1) | N(4)  | C(9)  | 114.7(5) | Co(1) | N(4)  | C(36) | 139.6(6) |
| C(9)  | N(4)  | C(36) | 105.4(7) | C(23) | N(5)  | C(30) | 108.0(7) |
| C(23) | N(5)  | H(3)  | 125.0    | C(30) | N(5)  | H(3)  | 127.0    |

Table 4. Bond Angles(°) (continued)

| atom  | atom  | atom  | angle    | atom  | atom  | atom  | angle    |
|-------|-------|-------|----------|-------|-------|-------|----------|
| Co(2) | N(6)  | C(17) | 140.0(5) | Co(2) | N(6)  | C(46) | 114.3(5) |
| C(17) | N(6)  | C(46) | 105.1(6) | Co(2) | N(7)  | C(6)  | 113.8(5) |
| Co(2) | N(7)  | C(14) | 139.0(5) | C(6)  | N(7)  | C(14) | 107.2(6) |
| Co(1) | N(8)  | C(5)  | 116.5(5) | Co(1) | N(8)  | C(28) | 138.4(5) |
| C(5)  | N(8)  | C(28) | 104.8(6) | C(6)  | N(9)  | C(27) | 105.6(7) |
| C(9)  | N(10) | C(26) | 102.9(7) | C(9)  | N(10) | H(4)  | 130.2    |
| C(26) | N(10) | H(4)  | 126.8    | Co(2) | N(11) | C(1)  | 139.8(5) |
| Co(2) | N(11) | C(3)  | 112.8(5) | C(1)  | N(11) | C(3)  | 105.6(6) |
| Co(1) | N(12) | C(4)  | 138.2(6) | Co(1) | N(12) | C(23) | 114.5(5) |
| C(4)  | N(12) | C(23) | 107.1(7) | Co(1) | N(13) | C(13) | 138.4(5) |
| Co(1) | N(13) | C(21) | 114.8(5) | C(13) | N(13) | C(21) | 105.7(7) |
| Co(2) | N(14) | C(7)  | 114.4(5) | Co(2) | N(14) | C(8)  | 138.2(5) |
| C(7)  | N(14) | C(8)  | 107.0(6) | C(21) | N(16) | C(31) | 104.2(7) |
| C(21) | N(16) | H(5)  | 128.3    | C(31) | N(16) | H(5)  | 127.5    |
| C(2)  | N(17) | C(18) | 103.8(6) | C(2)  | N(17) | H(6)  | 129.5    |
| C(18) | N(17) | H(6)  | 126.6    | C(5)  | N(18) | C(33) | 103.4(7) |
| Co(1) | N(20) | C(15) | 115.8(5) | Co(1) | N(20) | C(32) | 138.1(6) |
| C(15) | N(20) | C(32) | 106.1(7) | C(16) | N(21) | C(37) | 105.5(7) |
| C(15) | N(22) | C(29) | 103.7(7) | Co(1) | N(24) | C(16) | 113.2(5) |
| Co(1) | N(24) | C(34) | 139.8(6) | C(16) | N(24) | C(34) | 106.8(7) |
| C(7)  | N(25) | C(25) | 104.9(7) | Co(2) | N(26) | C(2)  | 115.6(5) |
| Co(2) | N(26) | C(12) | 141.3(5) | C(2)  | N(26) | C(12) | 102.8(6) |
| Co(2) | N(27) | C(11) | 113.5(5) | Co(2) | N(27) | C(19) | 138.2(5) |
| C(11) | N(27) | C(19) | 108.1(6) | N(11) | C(1)  | C(20) | 107.6(7) |

Table 4. Bond Angles(°) (continued)

| atom  | atom  | atom  | angle    | atom  | atom  | atom  | angle    |
|-------|-------|-------|----------|-------|-------|-------|----------|
| N(11) | C(1)  | H(7)  | 127.8    | C(20) | C(1)  | H(7)  | 124.6    |
| N(17) | C(2)  | N(26) | 115.6(6) | N(17) | C(2)  | C(7)  | 133.1(7) |
| N(26) | C(2)  | C(7)  | 111.1(7) | N(1)  | C(3)  | N(11) | 111.5(7) |
| N(1)  | C(3)  | C(11) | 135.6(7) | N(11) | C(3)  | C(11) | 112.7(7) |
| N(12) | C(4)  | C(30) | 107.5(7) | N(12) | C(4)  | H(8)  | 126.9    |
| C(30) | C(4)  | H(8)  | 125.5    | N(8)  | C(5)  | N(18) | 115.8(7) |
| N(8)  | C(5)  | C(23) | 111.9(7) | N(18) | C(5)  | C(23) | 132.3(7) |
| N(7)  | C(6)  | N(9)  | 110.5(7) | N(7)  | C(6)  | C(46) | 114.7(6) |
| N(9)  | C(6)  | C(46) | 134.8(7) | N(14) | C(7)  | N(25) | 112.3(7) |
| N(14) | C(7)  | C(2)  | 115.4(6) | N(25) | C(7)  | C(2)  | 132.3(7) |
| N(14) | C(8)  | C(25) | 107.9(7) | N(14) | C(8)  | H(9)  | 128.4    |
| C(25) | C(8)  | H(9)  | 123.6    | N(4)  | C(9)  | N(10) | 114.6(7) |
| N(4)  | C(9)  | C(16) | 113.2(7) | N(10) | C(9)  | C(16) | 132.2(7) |
| N(2)  | C(10) | C(19) | 107.4(7) | N(2)  | C(10) | H(10) | 126.2    |
| C(19) | C(10) | H(10) | 126.2    | N(2)  | C(11) | N(27) | 110.2(7) |
| N(2)  | C(11) | C(3)  | 132.1(7) | N(27) | C(11) | C(3)  | 117.7(7) |
| N(26) | C(12) | C(18) | 108.3(7) | N(26) | C(12) | H(11) | 124.9    |
| C(18) | C(12) | H(11) | 126.7    | N(13) | C(13) | C(31) | 107.1(7) |
| N(13) | C(13) | H(12) | 128.1    | C(31) | C(13) | H(12) | 124.6    |
| N(7)  | C(14) | C(27) | 107.9(7) | N(7)  | C(14) | H(13) | 126.5    |
| C(27) | C(14) | H(13) | 125.6    | N(20) | C(15) | N(22) | 113.4(7) |
| N(20) | C(15) | C(21) | 113.5(7) | N(22) | C(15) | C(21) | 132.8(7) |
| N(21) | C(16) | N(24) | 110.9(7) | N(21) | C(16) | C(9)  | 133.5(7) |
| N(24) | C(16) | C(9)  | 115.5(7) | N(6)  | C(17) | C(35) | 107.3(7) |

Table 4. Bond Angles(°) (continued)

| atom  | atom  | atom  | angle    | atom  | atom  | atom  | angle    |
|-------|-------|-------|----------|-------|-------|-------|----------|
| N(6)  | C(17) | H(14) | 126.7    | C(35) | C(17) | H(14) | 125.9    |
| N(17) | C(18) | C(12) | 109.4(7) | N(17) | C(18) | H(15) | 125.4    |
| C(12) | C(18) | H(15) | 125.2    | N(27) | C(19) | C(10) | 107.5(7) |
| N(27) | C(19) | H(16) | 127.6    | C(10) | C(19) | H(16) | 124.8    |
| N(1)  | C(20) | C(1)  | 110.0(7) | N(1)  | C(20) | H(17) | 123.6    |
| C(1)  | C(20) | H(17) | 126.2    | N(13) | C(21) | N(16) | 113.0(7) |
| N(13) | C(21) | C(15) | 113.8(7) | N(16) | C(21) | C(15) | 133.0(7) |
| N(5)  | C(23) | N(12) | 110.0(7) | N(5)  | C(23) | C(5)  | 134.9(8) |
| N(12) | C(23) | C(5)  | 115.1(7) | O(1)  | C(24) | C(39) | 107.1(8) |
| O(1)  | C(24) | C(40) | 111.1(8) | O(1)  | C(24) | H(31) | 111.1    |
| C(39) | C(24) | C(40) | 111.9(9) | C(39) | C(24) | H(31) | 106.8    |
| C(40) | C(24) | H(31) | 108.7    | N(25) | C(25) | C(8)  | 107.9(6) |
| N(25) | C(25) | H(18) | 123.9    | C(8)  | C(25) | H(18) | 128.1    |
| N(10) | C(26) | C(36) | 110.3(8) | N(10) | C(26) | H(19) | 124.9    |
| C(36) | C(26) | H(19) | 124.8    | N(9)  | C(27) | C(14) | 108.8(7) |
| N(9)  | C(27) | H(20) | 125.0    | C(14) | C(27) | H(20) | 126.0    |
| N(8)  | C(28) | C(33) | 107.4(6) | N(8)  | C(28) | H(21) | 128.7    |
| C(33) | C(28) | H(21) | 123.8    | N(22) | C(29) | C(32) | 107.8(7) |
| N(22) | C(29) | H(22) | 125.0    | C(32) | C(29) | H(22) | 127.1    |
| N(5)  | C(30) | C(4)  | 107.3(7) | N(5)  | C(30) | H(23) | 120.7    |
| C(4)  | C(30) | H(23) | 132.0    | N(16) | C(31) | C(13) | 109.9(7) |
| N(16) | C(31) | H(24) | 122.9    | C(13) | C(31) | H(24) | 127.0    |
| N(20) | C(32) | C(29) | 108.9(7) | N(20) | C(32) | H(25) | 127.0    |
| C(29) | C(32) | H(25) | 123.7    | N(18) | C(33) | C(28) | 108.6(7) |

Table 4. Bond Angles(°) (continued)

| atom  | atom  | atom  | angle    | atom  | atom  | atom  | angle    |
|-------|-------|-------|----------|-------|-------|-------|----------|
| N(18) | C(33) | H(26) | 126.9    | C(28) | C(33) | H(26) | 124.5    |
| N(24) | C(34) | C(37) | 109.3(8) | N(24) | C(34) | H(27) | 127.2    |
| C(37) | C(34) | H(27) | 123.5    | N(3)  | C(35) | C(17) | 110.4(7) |
| N(3)  | C(35) | H(28) | 127.5    | C(17) | C(35) | H(28) | 122.1    |
| N(4)  | C(36) | C(26) | 106.8(7) | N(4)  | C(36) | H(29) | 126.9    |
| C(26) | C(36) | H(29) | 126.2    | N(21) | C(37) | C(34) | 107.4(7) |
| N(21) | C(37) | H(30) | 126.5    | C(34) | C(37) | H(30) | 126.1    |
| O(7)  | C(38) | C(41) | 110.8(9) | O(7)  | C(38) | C(42) | 110.3(9) |
| O(7)  | C(38) | H(32) | 107.8    | C(41) | C(38) | C(42) | 111.8(9) |
| C(41) | C(38) | H(32) | 105.1    | C(42) | C(38) | H(32) | 110.8    |
| C(24) | C(39) | H(33) | 110.0    | C(24) | C(39) | H(34) | 116.3    |
| C(24) | C(39) | H(35) | 110.8    | H(33) | C(39) | H(34) | 108.0    |
| H(33) | C(39) | H(35) | 104.1    | H(34) | C(39) | H(35) | 106.7    |
| C(24) | C(40) | H(36) | 112.5    | C(24) | C(40) | H(37) | 116.3    |
| C(24) | C(40) | H(38) | 112.6    | H(36) | C(40) | H(37) | 104.3    |
| H(36) | C(40) | H(38) | 104.6    | H(37) | C(40) | H(38) | 105.4    |
| C(38) | C(41) | H(39) | 116.6    | C(38) | C(41) | H(40) | 109.7    |
| C(38) | C(41) | H(41) | 113.2    | H(39) | C(41) | H(40) | 108.1    |
| H(39) | C(41) | H(41) | 105.1    | H(40) | C(41) | H(41) | 103.2    |
| C(38) | C(42) | H(42) | 108.5    | C(38) | C(42) | H(43) | 108.1    |
| C(38) | C(42) | H(44) | 104.2    | H(42) | C(42) | H(43) | 112.2    |
| H(42) | C(42) | H(44) | 110.6    | H(43) | C(42) | H(44) | 112.9    |
| O(8)  | C(43) | C(44) | 104(1)   | O(8)  | C(43) | C(45) | 111(1)   |
| O(8)  | C(43) | H(45) | 112.9    | C(44) | C(43) | C(45) | 113(1)   |

Table 4. Bond Angles(°) (continued)

| atom  | atom  | atom  | angle    | atom  | atom  | atom  | angle    |
|-------|-------|-------|----------|-------|-------|-------|----------|
| C(44) | C(43) | H(45) | 105.0    | C(45) | C(43) | H(45) | 108.6    |
| C(43) | C(44) | H(46) | 113.7    | C(43) | C(44) | H(47) | 112.1    |
| C(43) | C(44) | H(48) | 114.3    | H(46) | C(44) | H(47) | 105.8    |
| H(46) | C(44) | H(48) | 105.7    | H(47) | C(44) | H(48) | 104.3    |
| C(43) | C(45) | H(49) | 106.5    | C(43) | C(45) | H(50) | 107.5    |
| C(43) | C(45) | H(51) | 111.3    | H(49) | C(45) | H(50) | 103.9    |
| H(49) | C(45) | H(51) | 110.9    | H(50) | C(45) | H(51) | 116.1    |
| N(3)  | C(46) | N(6)  | 113.8(7) | N(3)  | C(46) | C(6)  | 131.6(7) |
| N(6)  | C(46) | C(6)  | 114.5(7) |       |       |       |          |
